# Supplementary material
Source: PubMed Central journal article supplement (PMC9162962)
Supplement: mmc1.pdf [file mmc1.pdf]

## Supplementary Materials

Discovery of 2-(furan-2-ylmethylene)hydrazine-1-carbothioamide derivatives as novel inhibitors of SARS-CoV-2 main protease

Xiaodong Dou<sup>a,#</sup>, Qi Sun<sup>b,#</sup>, Guofeng Xu<sup>a,#</sup>, Yameng Liu<sup>a</sup>, Caifang Zhang<sup>a</sup>, Bingding Wang<sup>a</sup>, Yangbin Lu<sup>b</sup>, Zheng Guo<sup>b</sup>, Lingyu Su<sup>a</sup>, Tongyu Huo<sup>a</sup>, Xinyi Zhao<sup>a</sup>, Chen Wang<sup>a</sup>, Zhongtian Yu<sup>b</sup>, Song Song<sup>a</sup>, Liangren Zhang<sup>a</sup>, Zhenming Liu<sup>a</sup>, Luhua Lai<sup>b,c,\*</sup>, Ning Jiao<sup>a,\*</sup>

<sup>a</sup>State Key Laboratory of Natural and Biomimetic Drugs, School of Pharmaceutical Sciences, Peking University, Beijing 100191, China

<sup>b</sup>BNLMS, Peking-Tsinghua Center for Life Sciences at College of Chemistry and Molecular Engineering, Peking University, Beijing 100871, China

<sup>c</sup>Center for Quantitative Biology, Academy for Advanced Interdisciplinary Studies, Peking University, Beijing 100871, China

# These authors contributed equally to this work.

\* To whom correspondence should be addressed.

L. Lai: lhlai@pku.edu.cn; N. Jiao: jiaoning@pku.edu.cn

### Figure Legends

|                                                                                                                     |     |
|---------------------------------------------------------------------------------------------------------------------|-----|
| <b>Figure S1.</b> The concentration-activity relationship for identified SARS-CoV-2 M <sup>Pro</sup> inhibitors ... | S2  |
| <b>Figure S2.</b> Predicted binding mode of compound <b>F8-S43</b> .....                                            | S3  |
| <b>Figure S3.</b> Dose-response curves of the inhibition activity of <b>F8-B6</b> .....                             | S4  |
| <b>Figure S4.</b> The inhibition of compounds <b>F8-B6</b> and <b>F8-B22</b> against Cathepsin L .....              | S5  |
| <b>Table S1.</b> The chemical structures and enzymatic activities of the 27 analogs of <b>F8</b> .....              | S6  |
| <b>Table S2.</b> Enzymatic activity and chemical structures of the 22 analogs of <b>F8-S43</b> .....                | S9  |
| <b>NMR Spectra</b> .....                                                                                            | S11 |

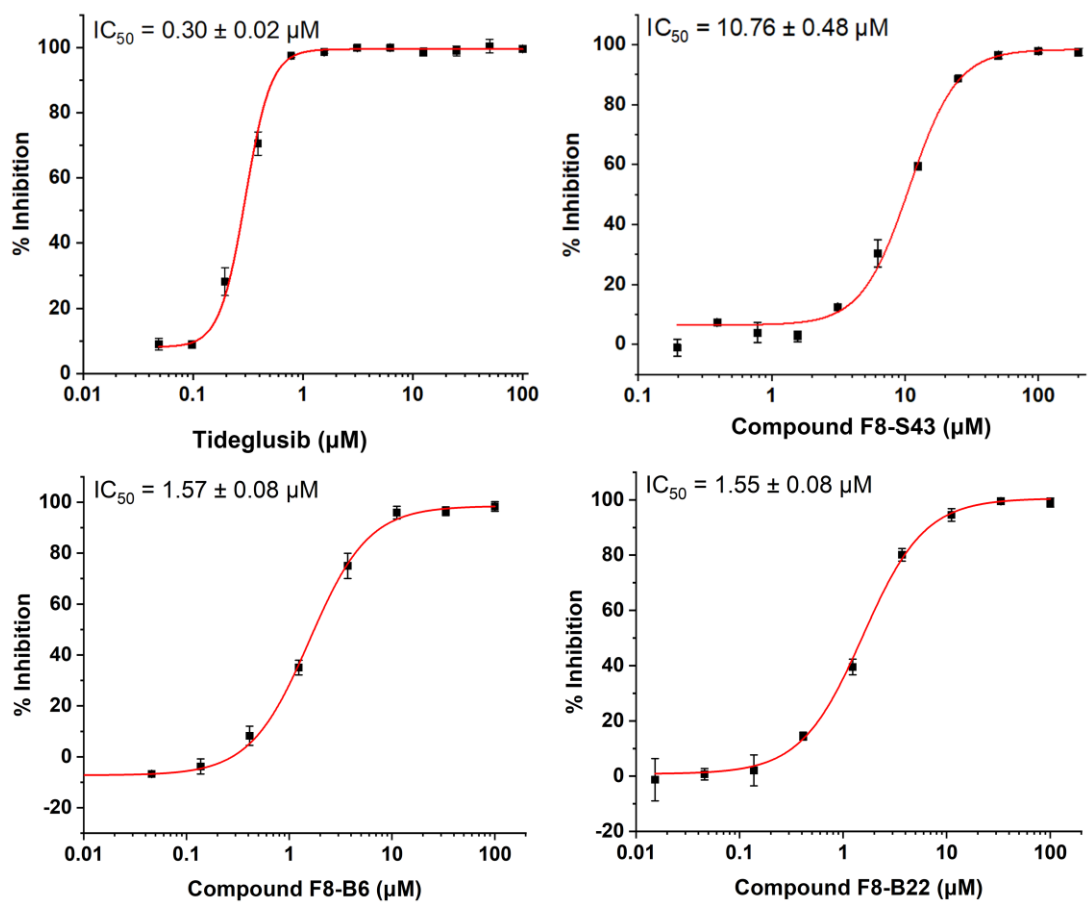

**Figure S1.** The concentration-activity relationship for identified SARS-CoV-2 M<sup>pro</sup> inhibitors.

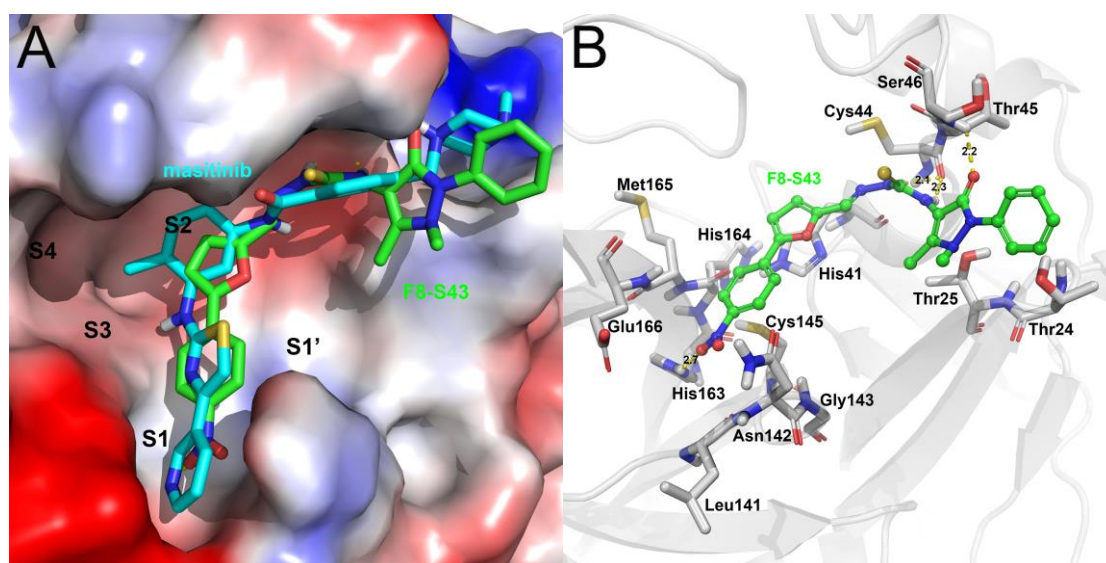

**Figure S2.** Predicted binding mode of compound **F8-S43**. (A) Superimposition of the crystal structure of SARS-CoV-2 M<sup>pro</sup> (PDB ID: 7JU7) with compound **F8-S43**. (B) The binding modes of compound **F8-S43** with SARS-CoV-2 M<sup>pro</sup> in the cartoon. Hydrogen bonds are represented by yellow lines. Images depicting the proposed binding modes were generated using PyMOL software.

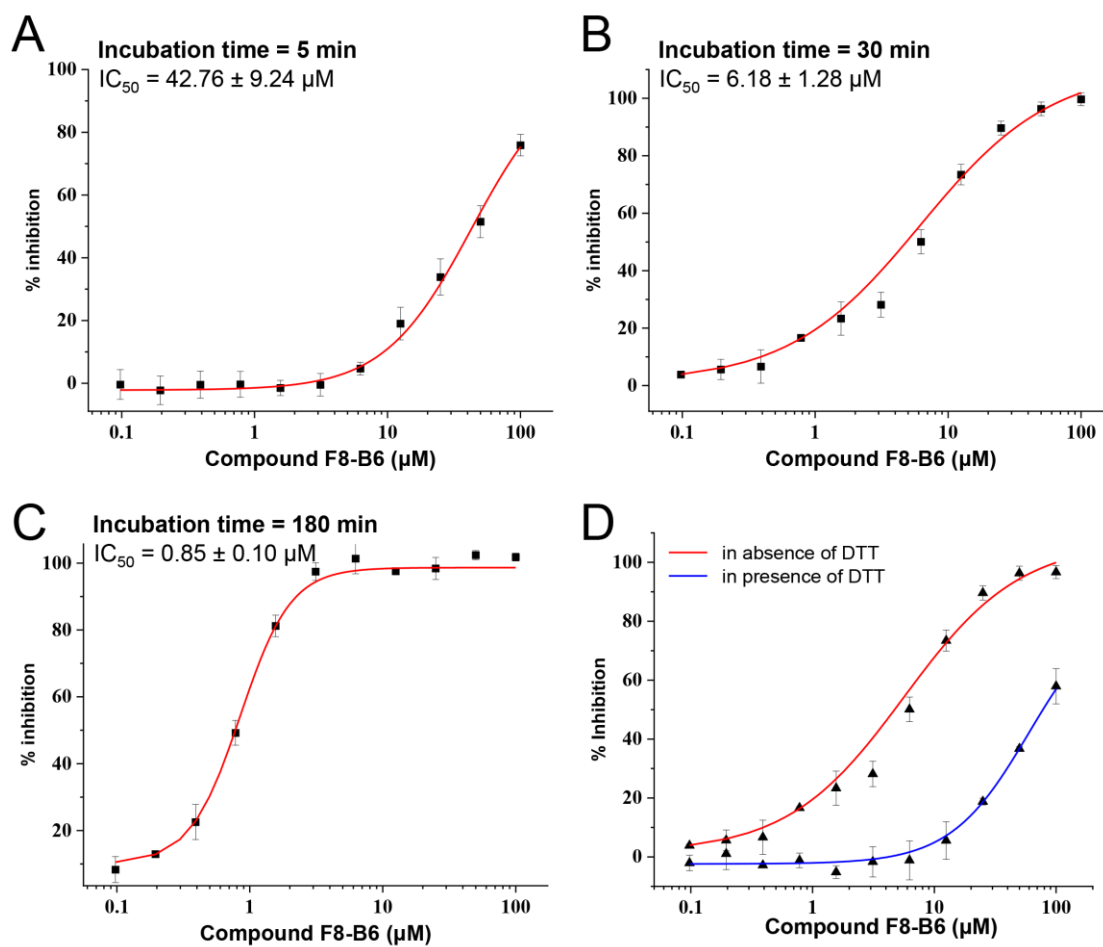

**Figure S3.** Dose-response curves of the inhibition activity of **F8-B6** under different incubation times 5 min (A), 30 min (B), 180 min (C). (D) Dose-response curves of the inhibition activity of **F8-B6** in the presence or absence of DTT.

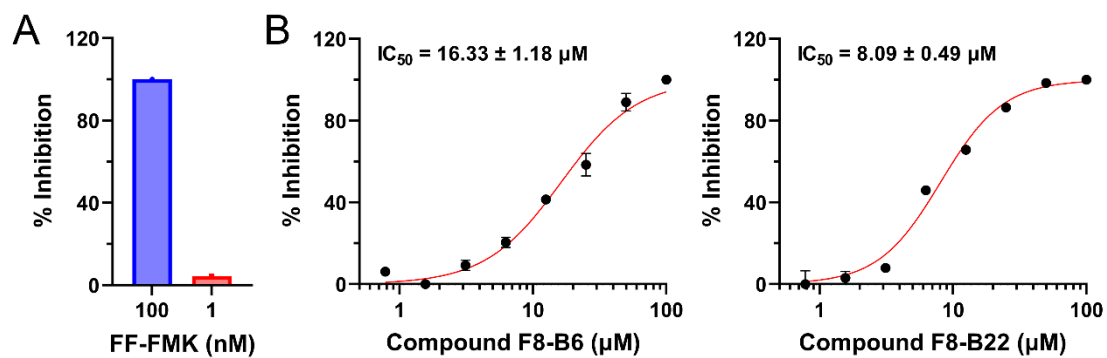

**Figure S4.** (A) The inhibition of Cathepsin L inhibitor **FF-FMK**. (B) The concentration-activity relationship for compounds **F8-B6** and **F8-B22** against Cathepsin L. Data are presented as geometric mean values of at least two independent runs.

**Table S1.** The chemical structures and enzymatic activities of the 27 analogs of **F8**.

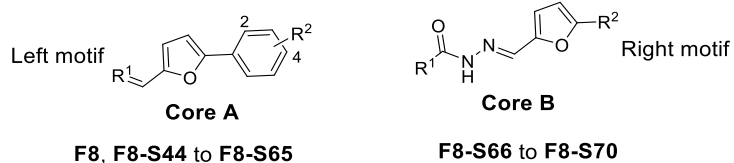

| Compounds  | Core | R <sup>1</sup> | R <sup>2</sup>    | Inhibition%<br>(50 μM) <sup>a</sup> | IC <sub>50</sub> ± SD<br>(μM) <sup>a</sup> |
|------------|------|----------------|-------------------|-------------------------------------|--------------------------------------------|
| Tideglusib | —    | —              | —                 | 98.6                                | 0.30 ± 0.02                                |
| F8         | A    |                | 3-COOH            | 65.0                                | 21.28 ± 0.89                               |
| F8-S44     | A    |                | 3-COOH,<br>4-Cl   | < 20.0                              | N.T. <sup>b</sup>                          |
| F8-S45     | A    |                | 3-COOH            | 28.2                                | N.T.                                       |
| F8-S46     | A    |                | 3-COOH,<br>4-OH   | < 20.0                              | N.T.                                       |
| F8-S47     | A    |                | 3-COOH            | 34.6                                | N.T.                                       |
| F8-S48     | A    |                | 3-COOH,<br>4-OH   | 45.9                                | N.T.                                       |
| F8-S49     | A    |                | 3-NO <sub>2</sub> | < 20.0                              | N.T.                                       |
| F8-S50     | A    |                | 3-COOH,<br>4-Cl   | < 20.0                              | N.T.                                       |
| F8-S51     | A    |                | 4-NO <sub>2</sub> | 21.3                                | N.T.                                       |
| F8-S52     | A    |                | 3-COOH            | 30.0                                | N.T.                                       |

|        |   |                                                                                     |                 |        |      |
|--------|---|-------------------------------------------------------------------------------------|-----------------|--------|------|
| F8-S53 | A | 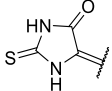   | 2-COOH          | < 20.0 | N.T. |
| F8-S54 | A |    | 3-COOH          | < 20.0 | N.T. |
| F8-S55 | A |    | 3-COOH          | < 20.0 | N.T. |
| F8-S56 | A |    | 3-COOH          | < 20.0 | N.T. |
| F8-S57 | A |    | 3-COOH,<br>4-Cl | 27.1   | N.T. |
| F8-S58 | A |   | 3-COOH          | 33.8   | N.T. |
| F8-S59 | A |  | 3-COOH          | 28.5   | N.T. |
| F8-S60 | A |  | 4-COOH          | < 20.0 | N.T. |
| F8-S61 | A |  | 3-COOH          | 30.3   | N.T. |
| F8-S62 | A |  | 3-COOH          | < 20.0 | N.T. |
| F8-S63 | A |  | 3-COOH,<br>4-Cl | 53.4   | N.T. |
| F8-S64 | A |  | 3-COOH          | 24.2   | N.T. |

|        |   |                                                                                   |                   |        |      |
|--------|---|-----------------------------------------------------------------------------------|-------------------|--------|------|
| F8-S65 | A | 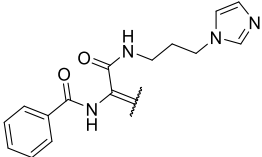 | 3-NO <sub>2</sub> | 28.8   | N.T. |
| F8-S66 | B |  | NO <sub>2</sub>   | < 20.0 | N.T. |
| F8-S67 | B |  | NO <sub>2</sub>   | < 20.0 | N.T. |
| F8-S68 | B |  | NO <sub>2</sub>   | < 20.0 | N.T. |
| F8-S69 | B |  | NO <sub>2</sub>   | < 20.0 | N.T. |
| F8-S70 | B |  | NO <sub>2</sub>   | < 20.0 | N.T. |

<sup>a</sup> Data are presented as geometric mean values of at least two independent runs. <sup>b</sup> Not tested.



**Table S2.** Enzymatic activity and chemical structures of the 22 analogs of **F8-S43**.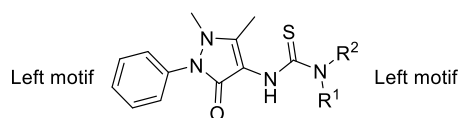

| Compounds  | R <sup>1</sup> | R <sup>2</sup> | Inhibition%<br>(50 μM) <sup>a</sup> | IC <sub>50</sub> ± SD<br>(μM) <sup>a</sup> |
|------------|----------------|----------------|-------------------------------------|--------------------------------------------|
| Tideglusib | -----          | -----          | 98.6                                | 0.30 ± 0.02                                |
| F8-S43     | H              |                | 95.0                                | 10.76 ± 0.48                               |
| F8-S43-S11 | H              | H              | < 20.0                              | N.T. <sup>b</sup>                          |
| F8-S43-S12 | H              |                | < 20.0                              | N.T.                                       |
| F8-S43-S13 | H              |                | < 20.0                              | N.T.                                       |
| F8-S43-S14 | Me             |                | < 20.0                              | N.T.                                       |
| F8-S43-S15 | H              |                | < 20.0                              | N.T.                                       |
| F8-S43-S16 | H              |                | < 20.0                              | N.T.                                       |
| F8-S43-S17 | H              |                | < 20.0                              | N.T.                                       |
| F8-S43-S18 | H              |                | < 20.0                              | N.T.                                       |
| F8-S43-S19 | H              |                | < 20.0                              | N.T.                                       |
| F8-S43-S20 | H              |                | < 20.0                              | N.T.                                       |
| F8-S43-S21 | H              |                | < 20.0                              | N.T.                                       |
| F8-S43-S22 | H              |                | < 20.0                              | N.T.                                       |
| F8-S43-S23 | H              |                | < 20.0                              | N.T.                                       |
| F8-S43-S24 | H              |                | < 20.0                              | N.T.                                       |

|            |   |                                                                                    |        |      |
|------------|---|------------------------------------------------------------------------------------|--------|------|
| F8-S43-S25 | H | 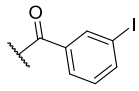  | < 20.0 | N.T. |
| F8-S43-S26 | H |   | < 20.0 | N.T. |
| F8-S43-S27 | H |   | < 20.0 | N.T. |
| F8-S43-S28 | H |   | < 20.0 | N.T. |
| F8-S43-S29 | H |   | < 20.0 | N.T. |
| F8-S43-S30 | H |   | < 20.0 | N.T. |
| F8-S43-S31 | H |   | < 20.0 | N.T. |
| F8-S43-S32 | H |  | 21.2   | N.T. |

<sup>a</sup> Data are presented as geometric mean values of at least two independent runs. <sup>b</sup> Not tested.

# NMR Spectra

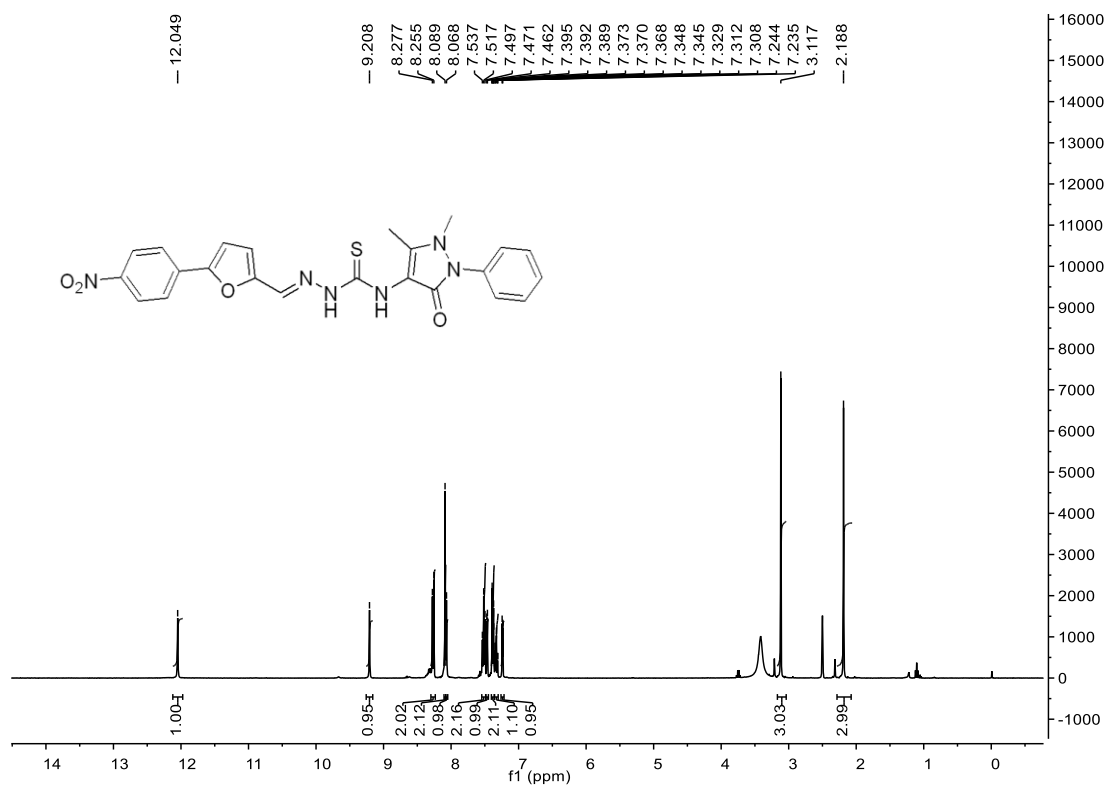

<sup>1</sup>H NMR of compound F8-S43 (400 MHz, DMSO-*d*<sub>6</sub>)

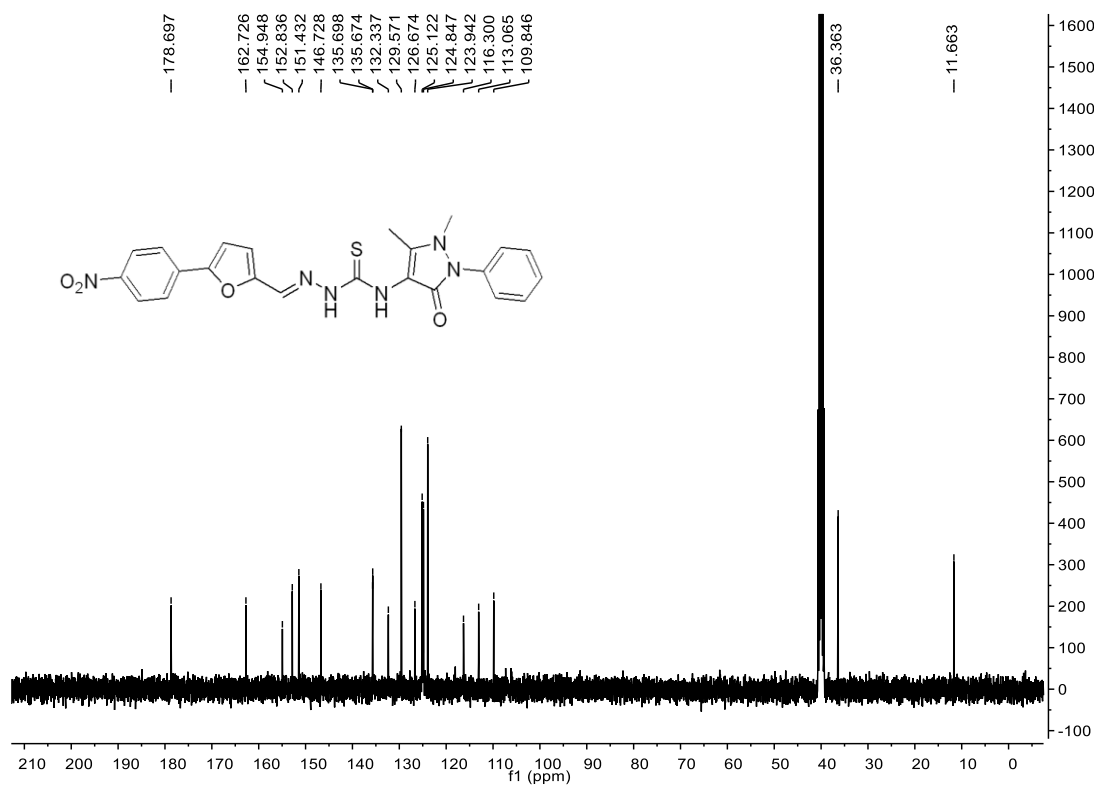

<sup>13</sup>C NMR of compound F8-S43 (100 MHz, DMSO-*d*<sub>6</sub>)

XEVO-G2QTOF#NotSet  
dxid-4-4A\_POS 13 (0.237) Cm (11:16-(2:8+27:51))

27-Jul-2020

Waters  
TOF MS ES+  
1.73e7

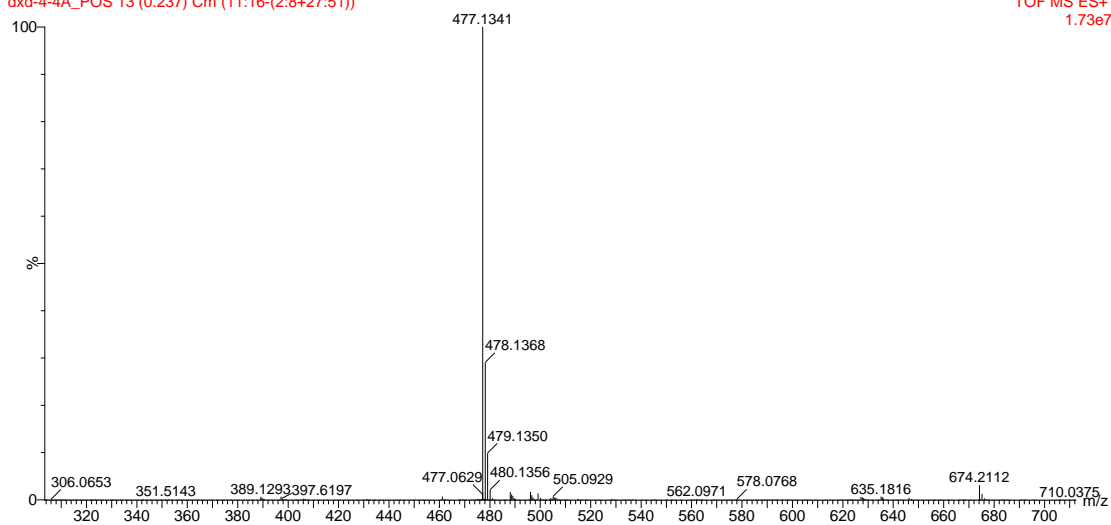

HRMS of compound **F8-S43** (ESI)

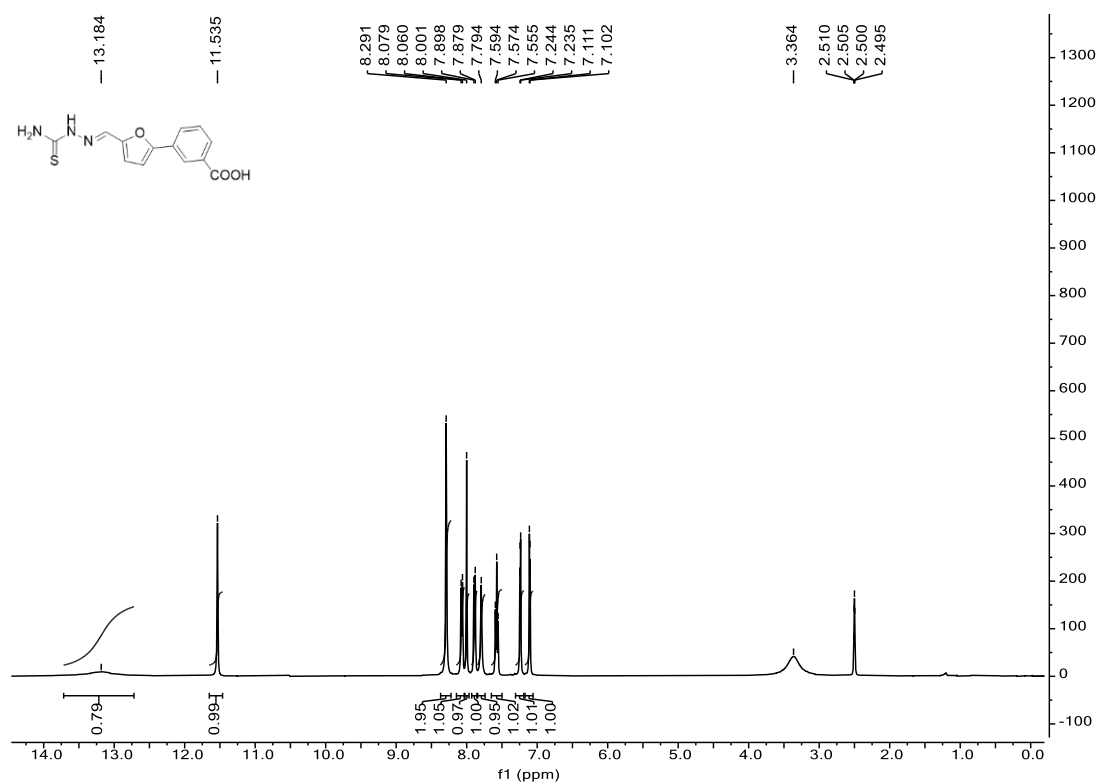

$^1\text{H}$  NMR of compound **F8-A1** (400 MHz,  $\text{DMSO-}d_6$ )

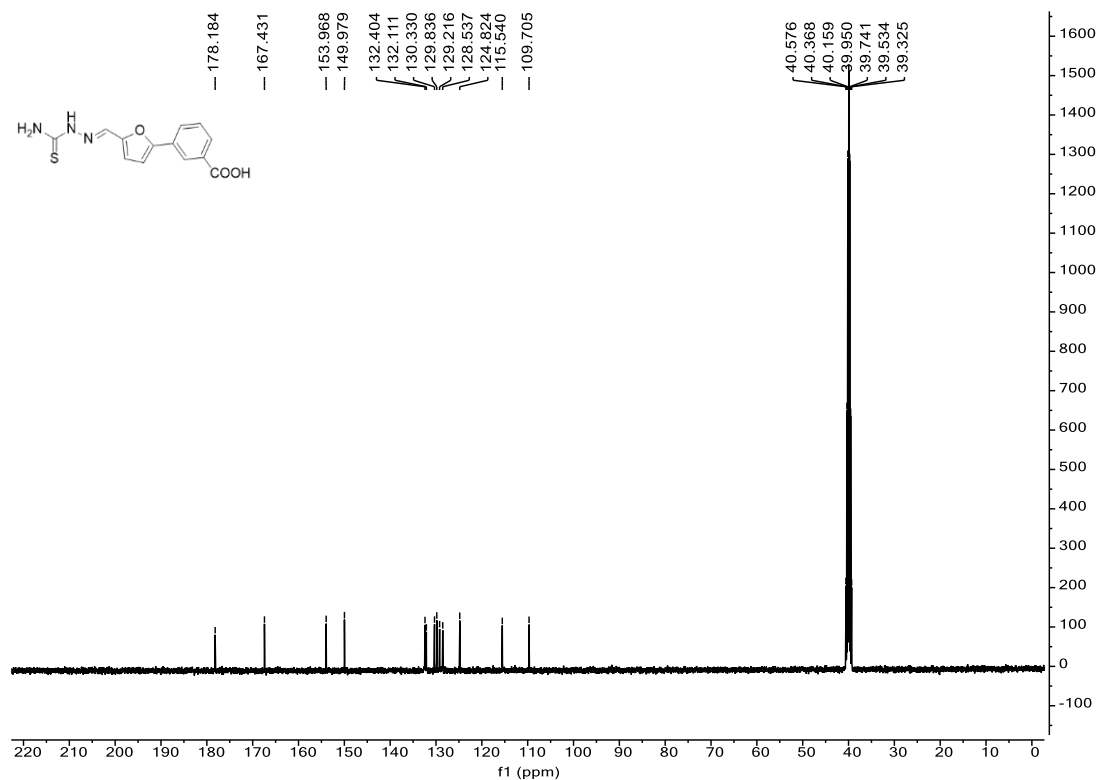

<sup>13</sup>C NMR of compound **F8-A1** (100 MHz, DMSO-*d*<sub>6</sub>)

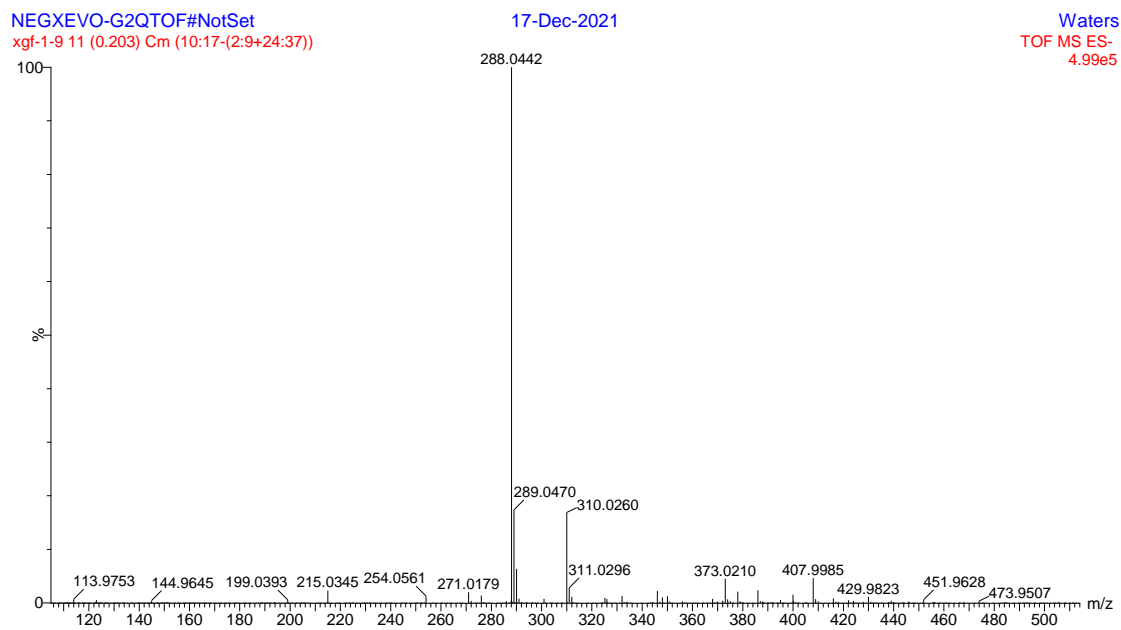

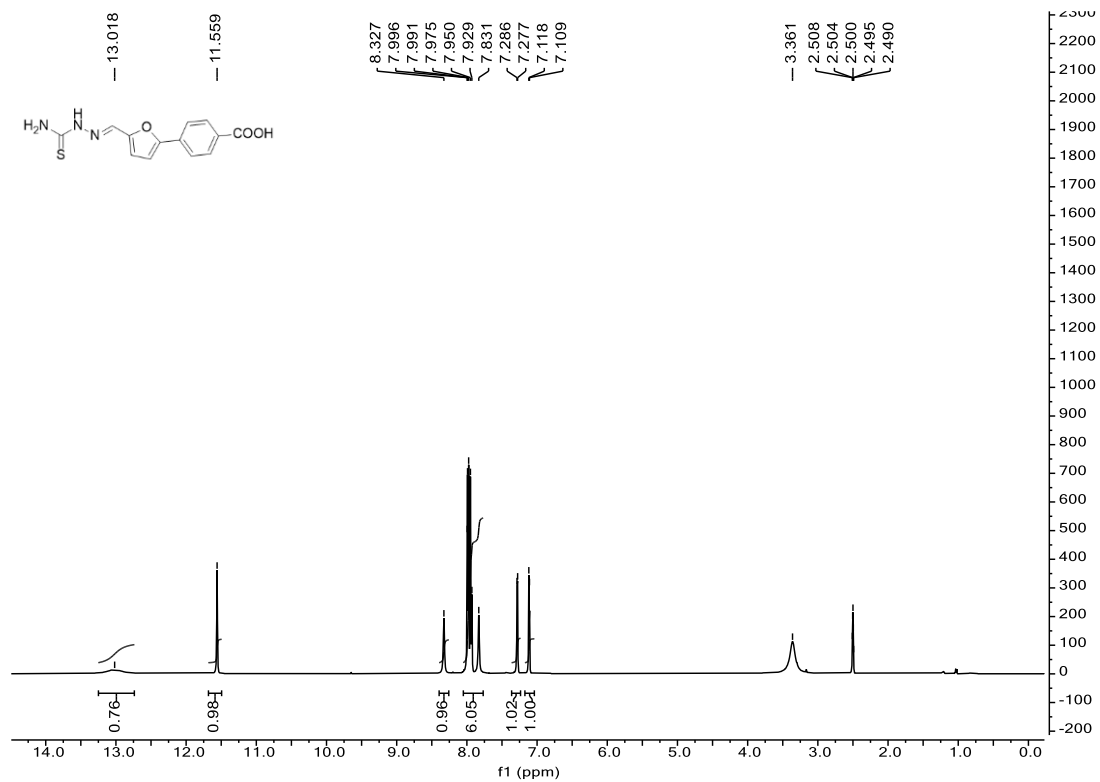

<sup>1</sup>H NMR of compound **F8-A2** (400 MHz, DMSO-*d*<sub>6</sub>)

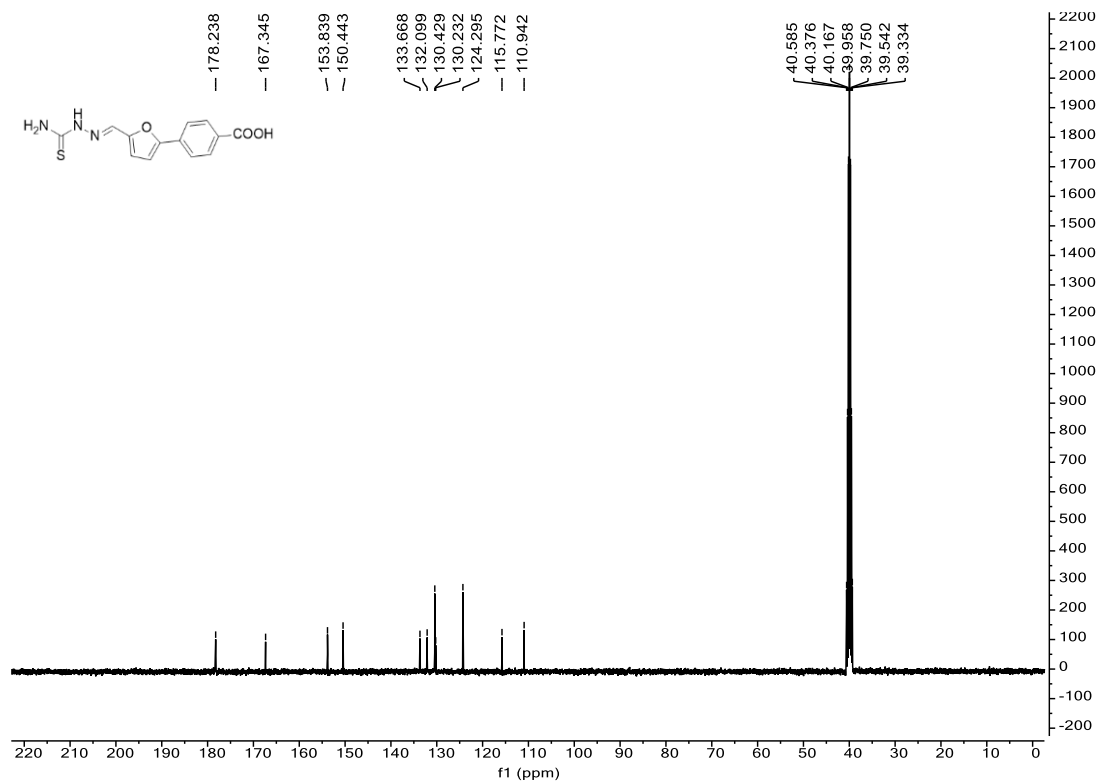

<sup>13</sup>C NMR of compound **F8-A2** (100 MHz, DMSO-*d*<sub>6</sub>)

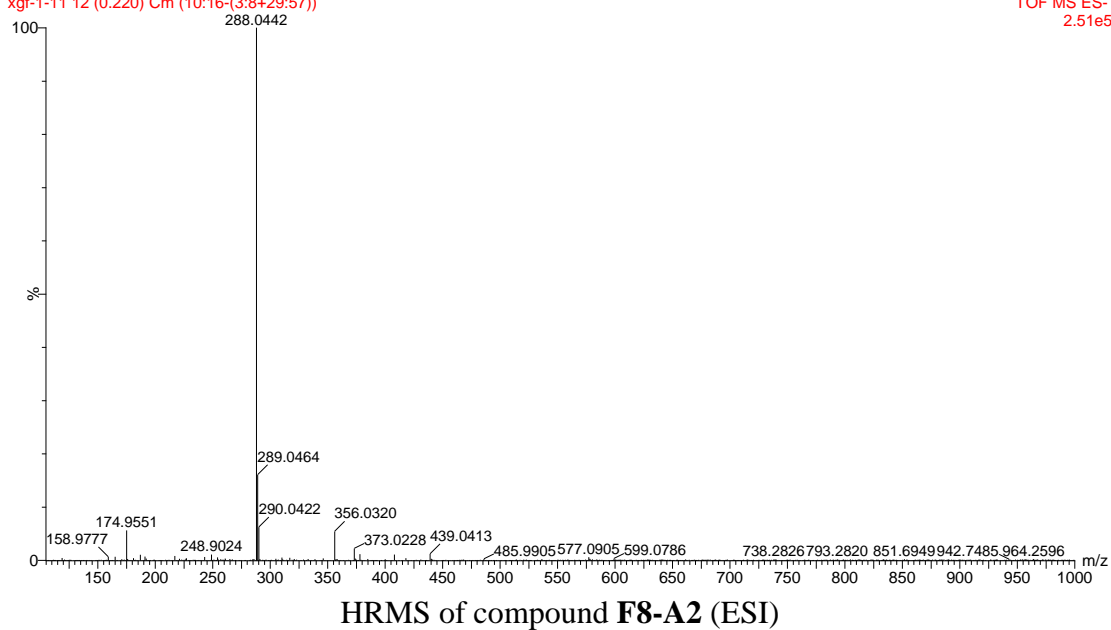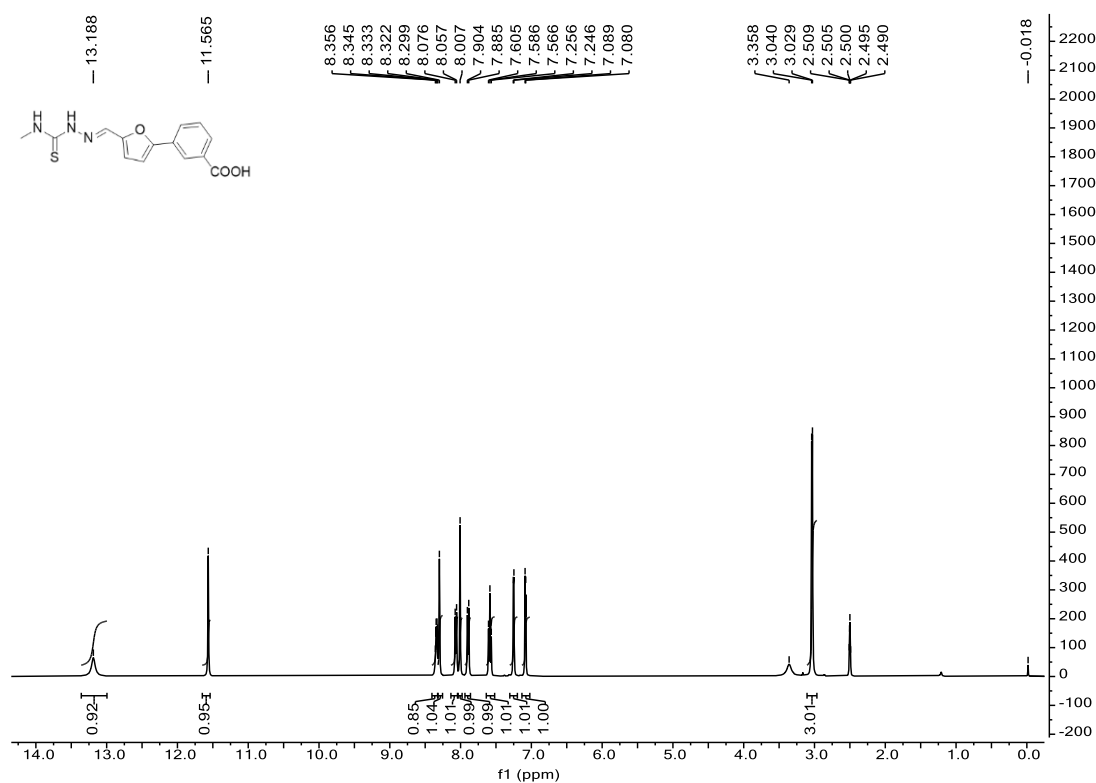

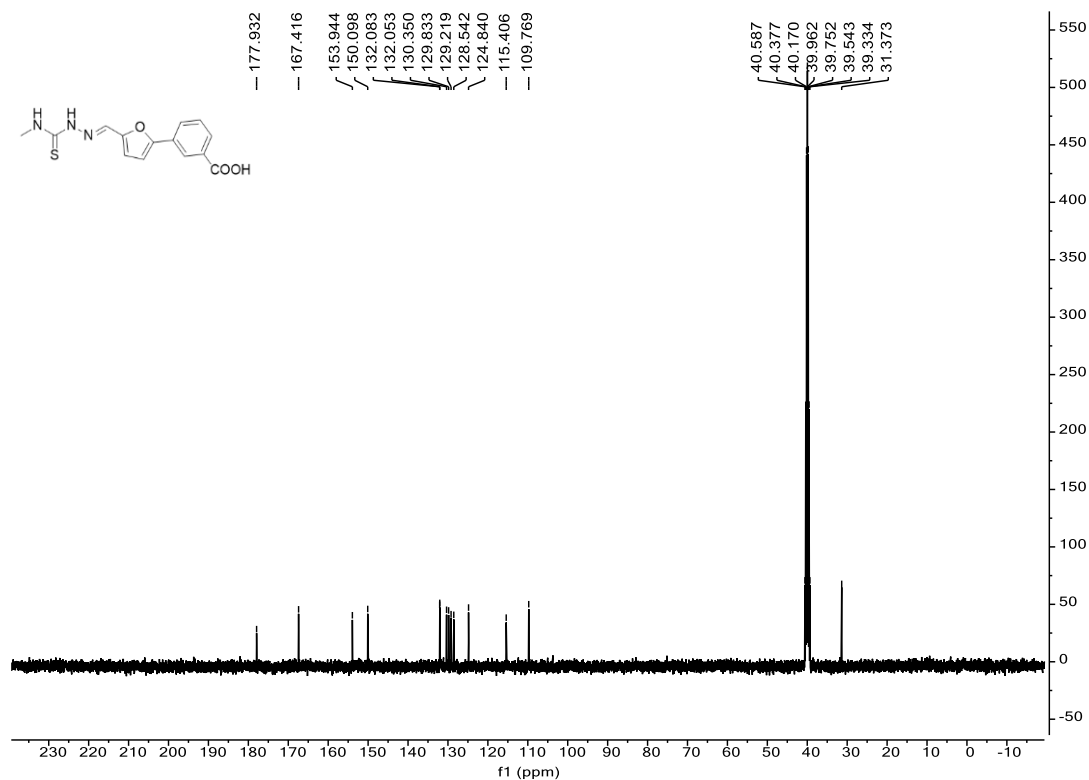

<sup>13</sup>C NMR of compound **F8-A3** (100 MHz, DMSO-*d*<sub>6</sub>)

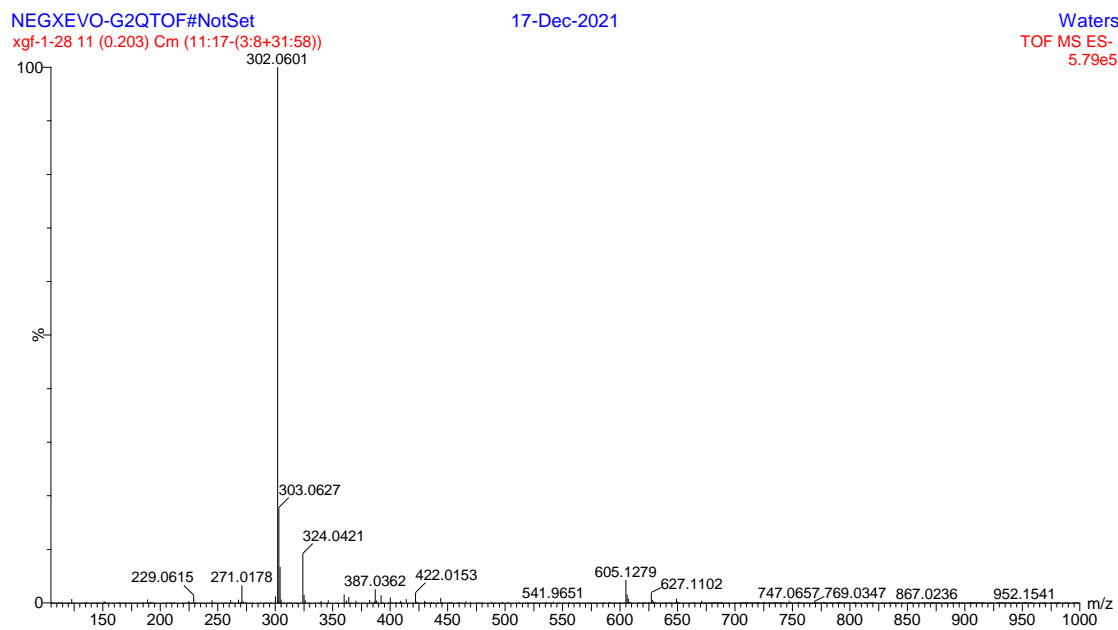

HRMS of compound **F8-A3** (ESI)



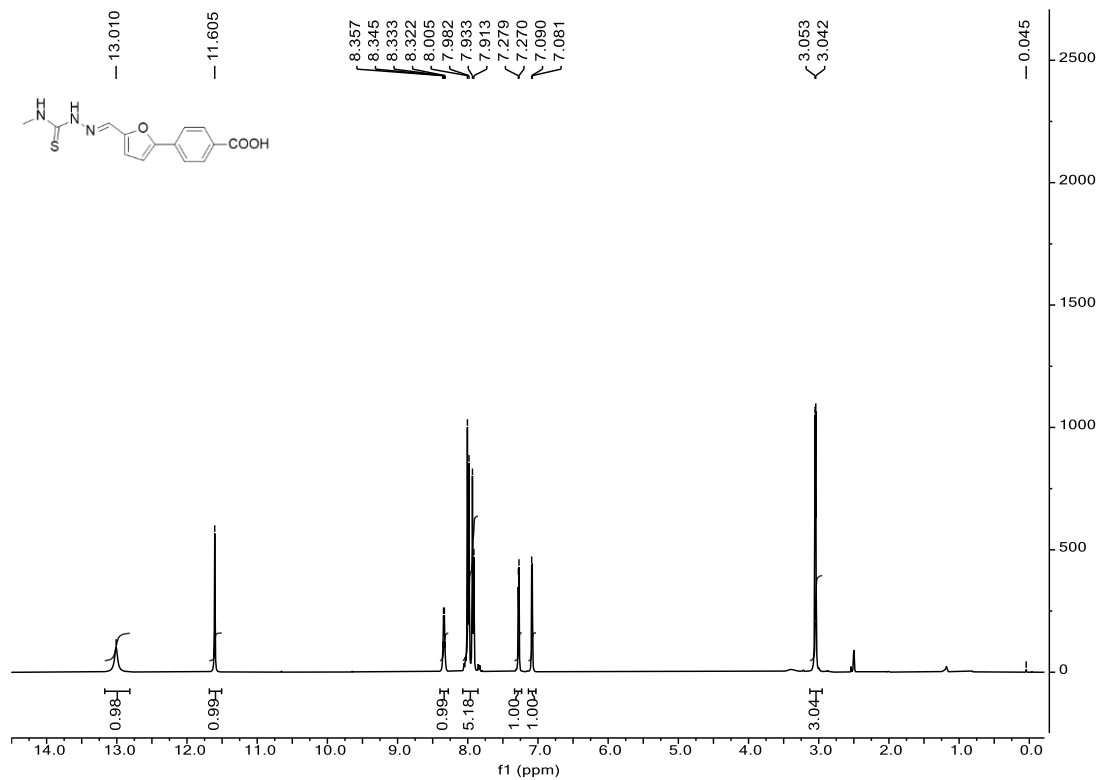

<sup>1</sup>H NMR of compound **F8-A4** (400 MHz, DMSO-*d*<sub>6</sub>)

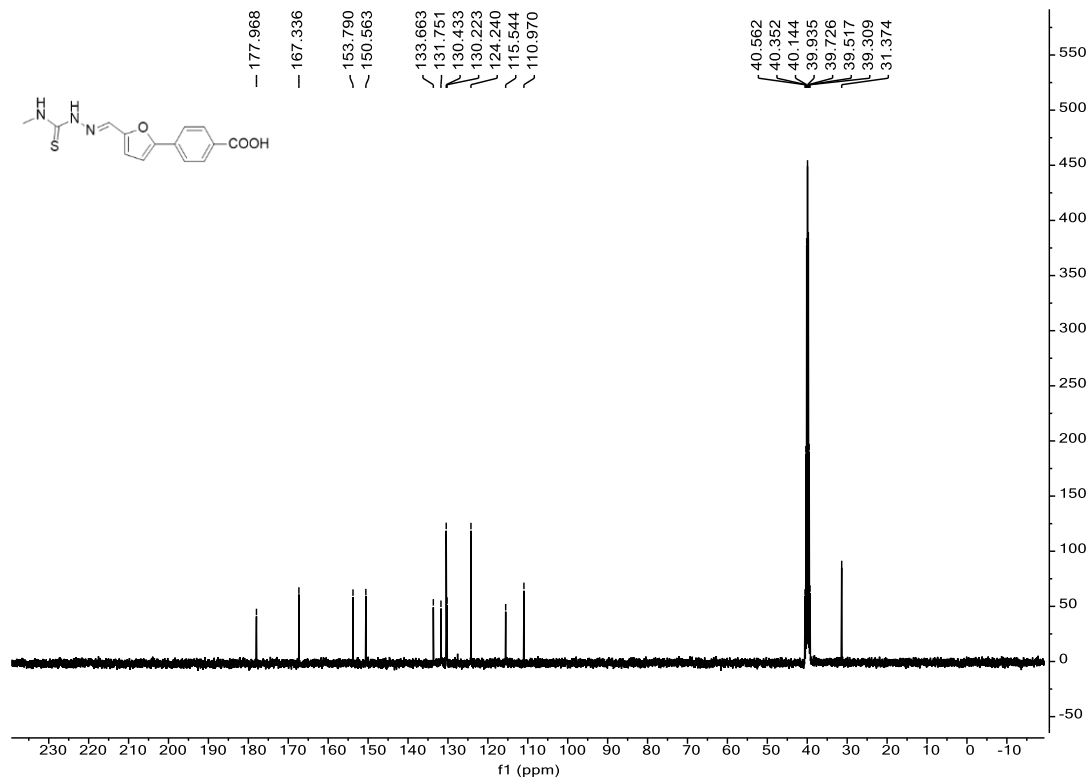

<sup>13</sup>C NMR of compound **F8-A4** (100 MHz, DMSO-*d*<sub>6</sub>)

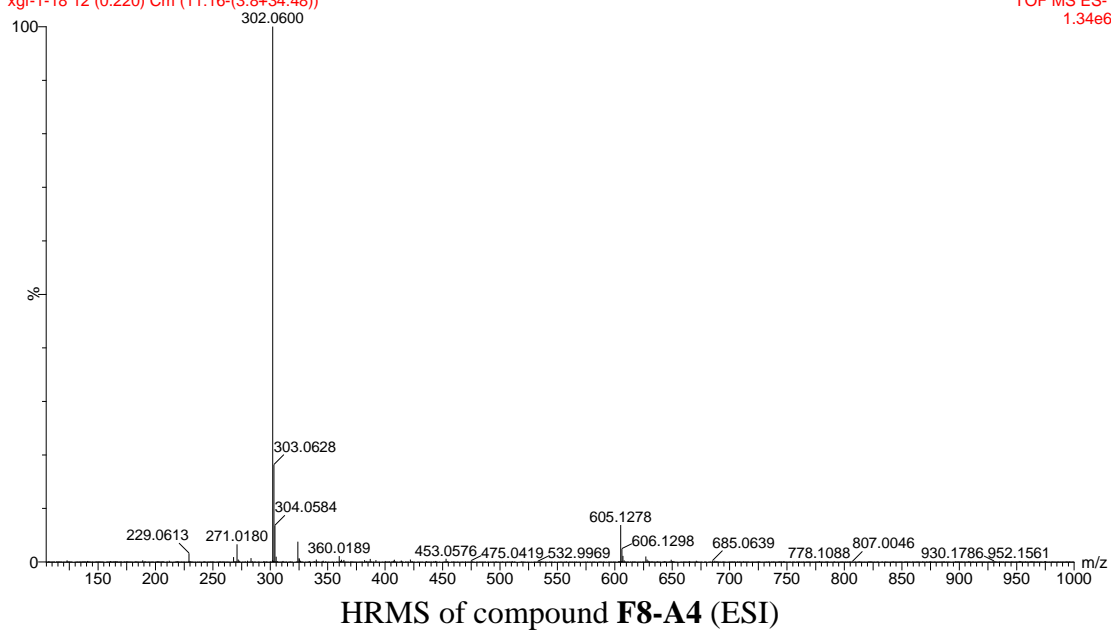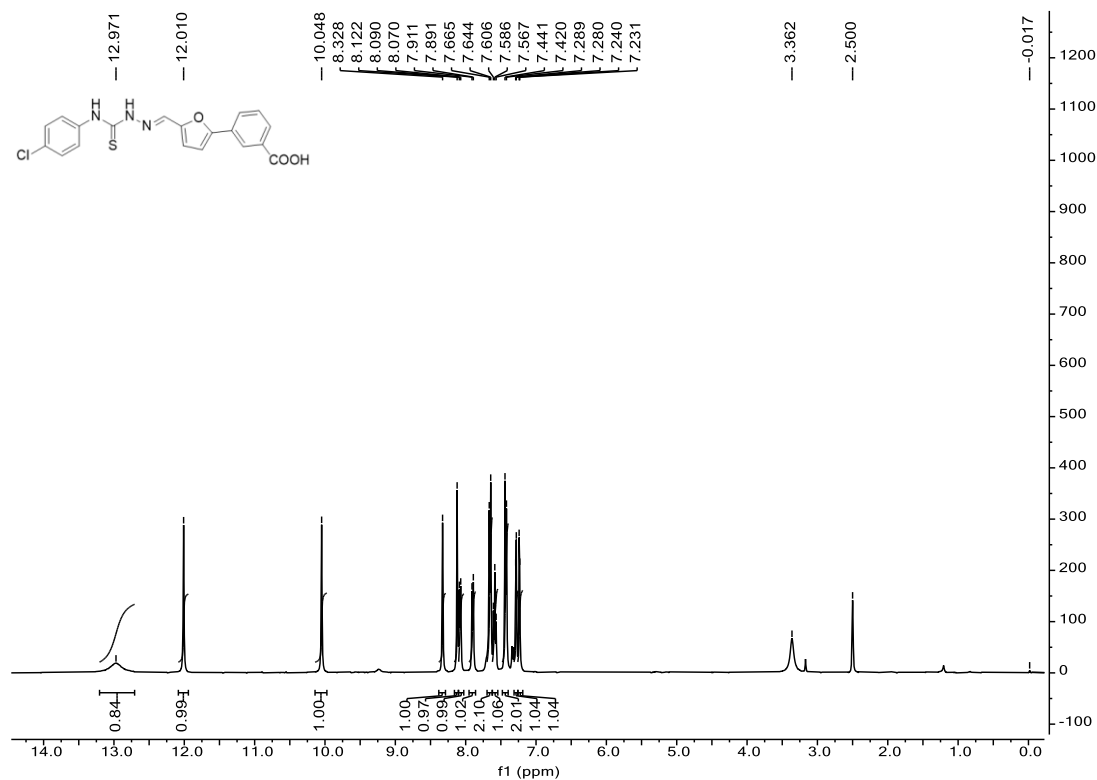

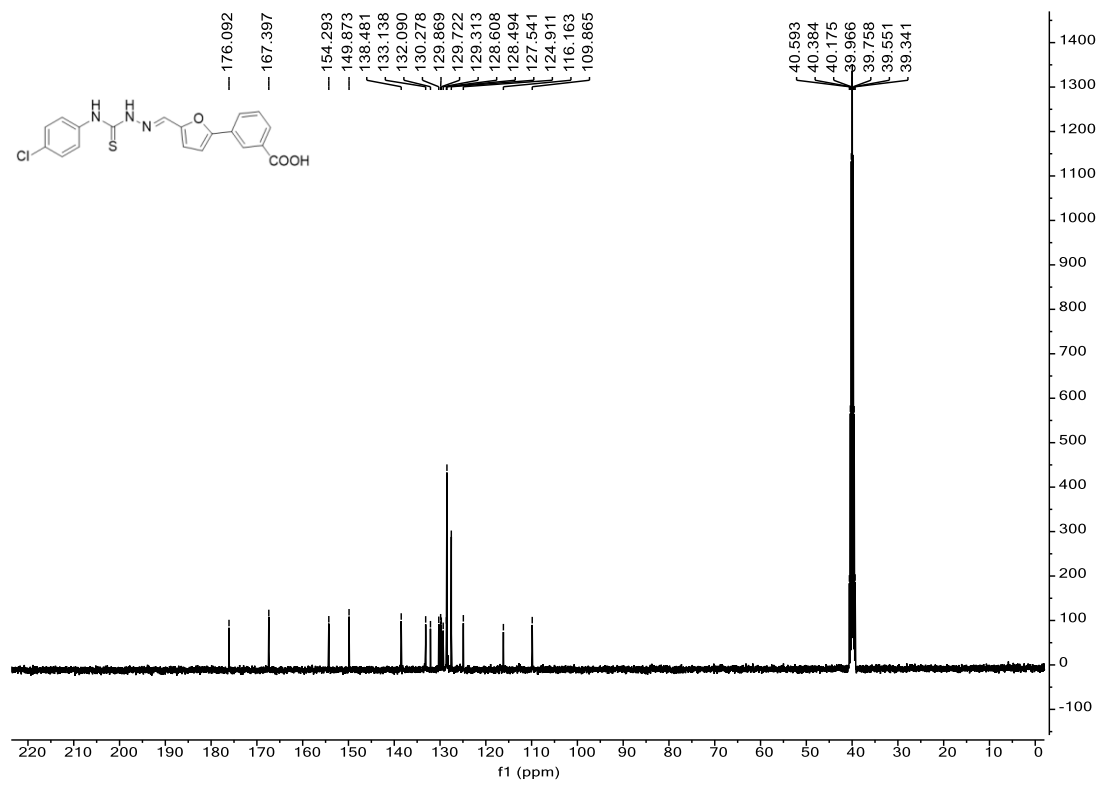

<sup>13</sup>C NMR of compound **F8-A5** (100 MHz, DMSO-*d*<sub>6</sub>)

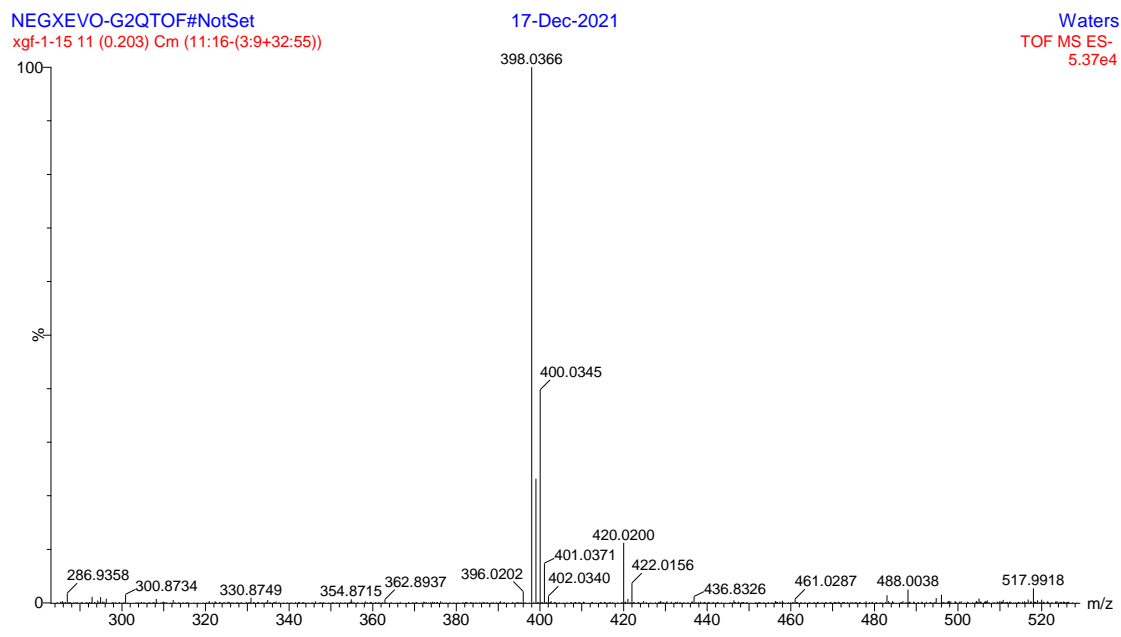

HRMS of compound **F8-A5** (ESI)

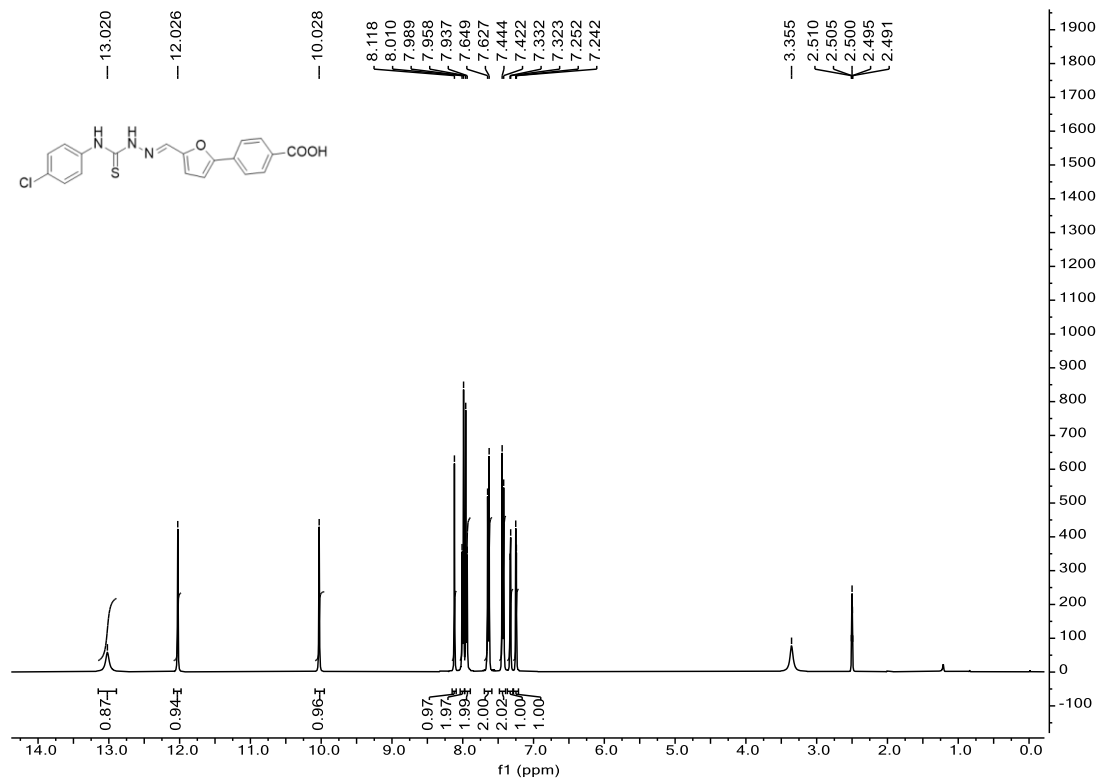

<sup>1</sup>H NMR of compound **F8-A6** (400 MHz, DMSO-*d*<sub>6</sub>)

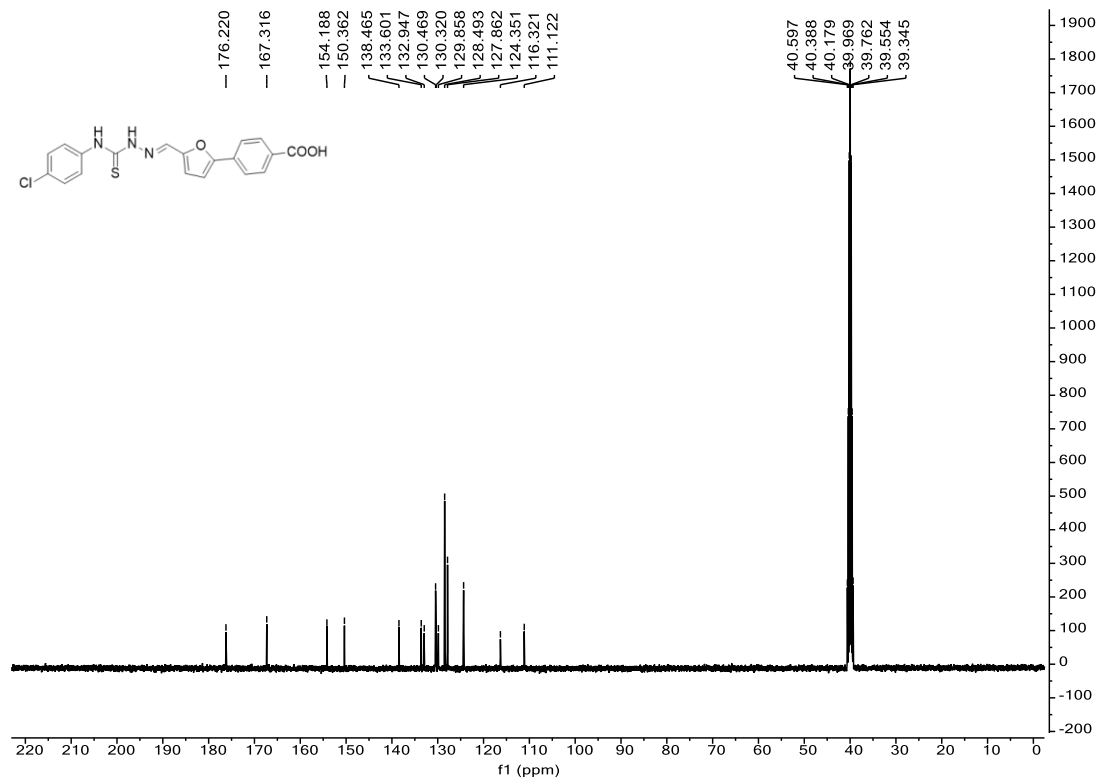

<sup>13</sup>C NMR of compound **F8-A6** (100 MHz, DMSO-*d*<sub>6</sub>)

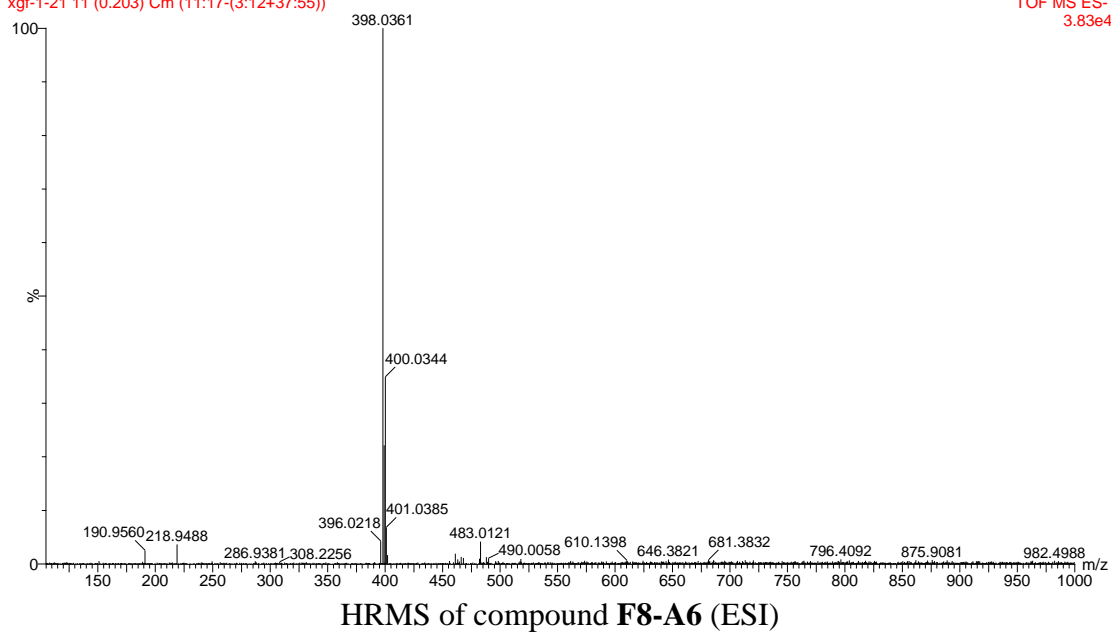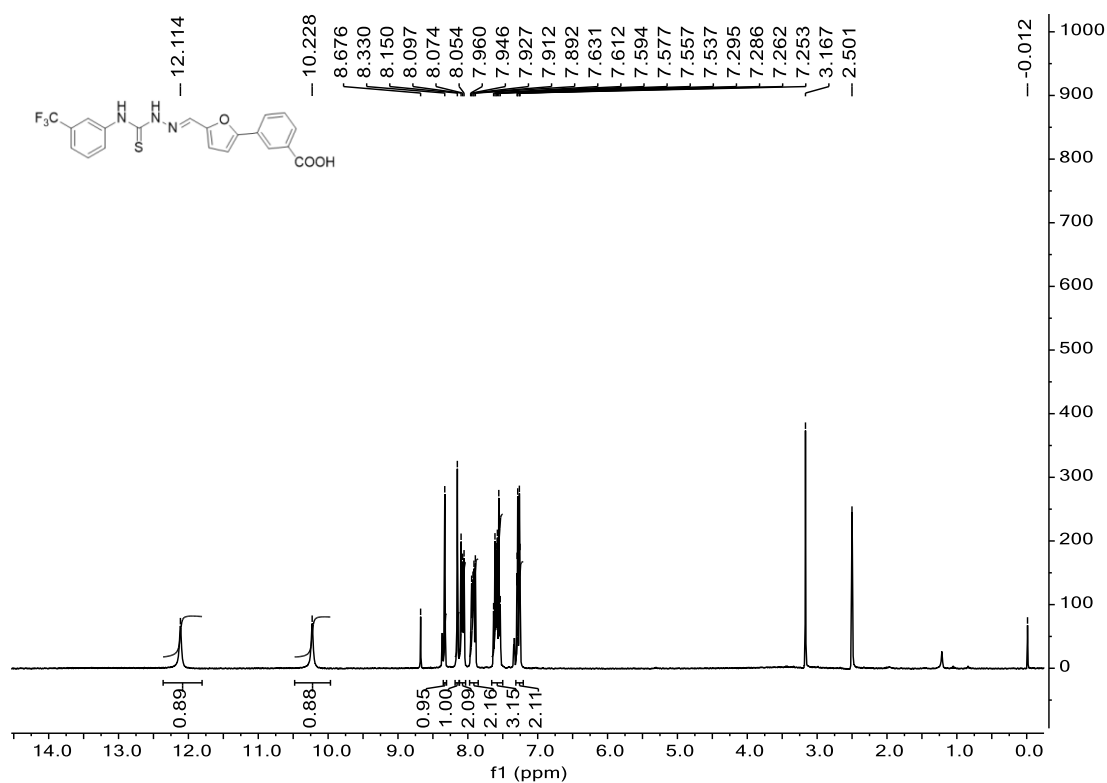

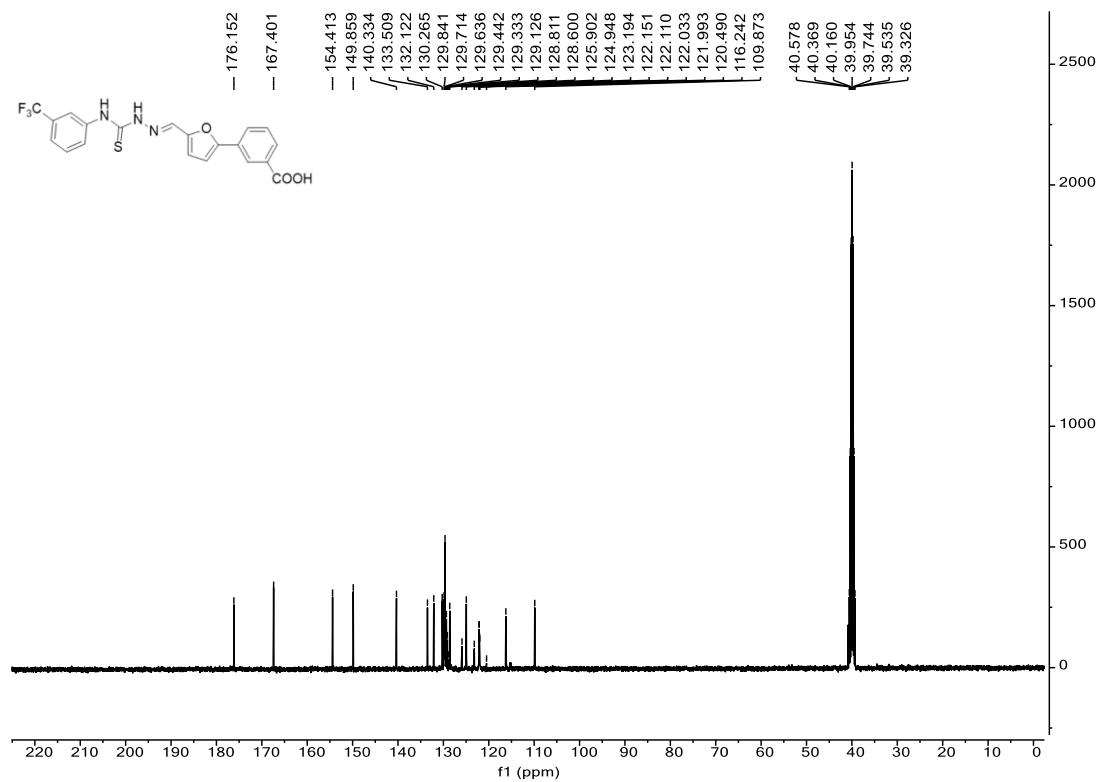

<sup>13</sup>C NMR of compound **F8-A7** (100 MHz, DMSO-*d*<sub>6</sub>)

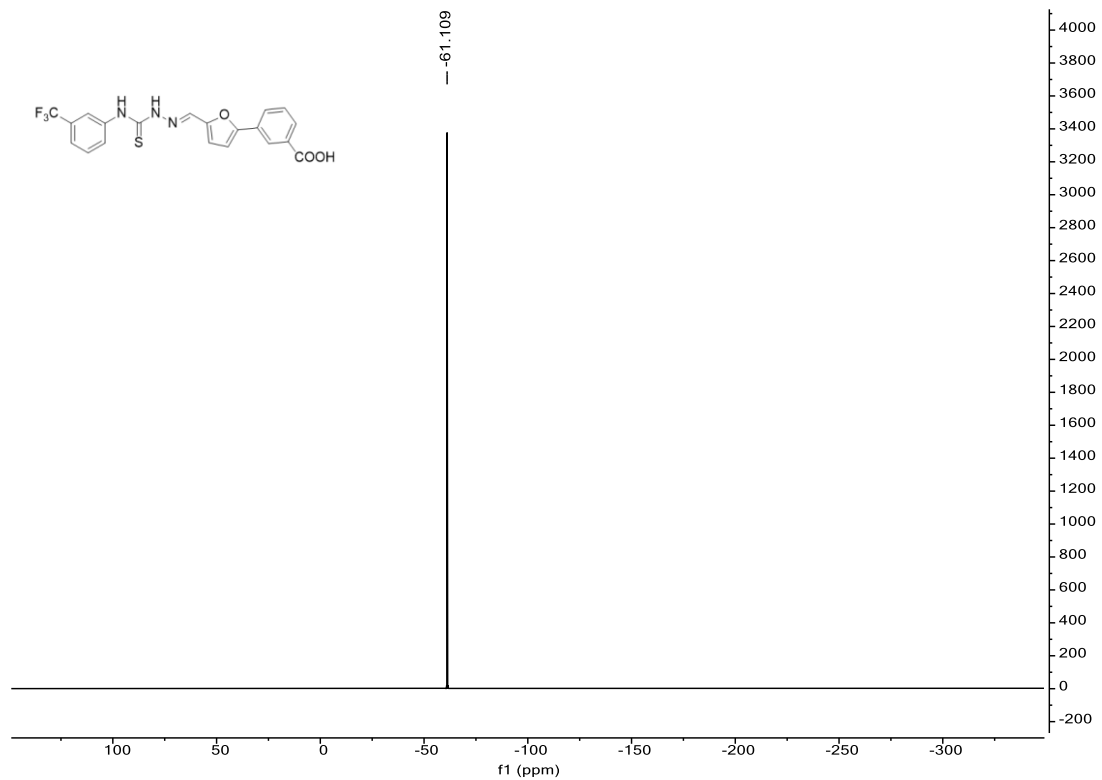

<sup>19</sup>F NMR of compound **F8-A7** (376 MHz, DMSO-*d*<sub>6</sub>)

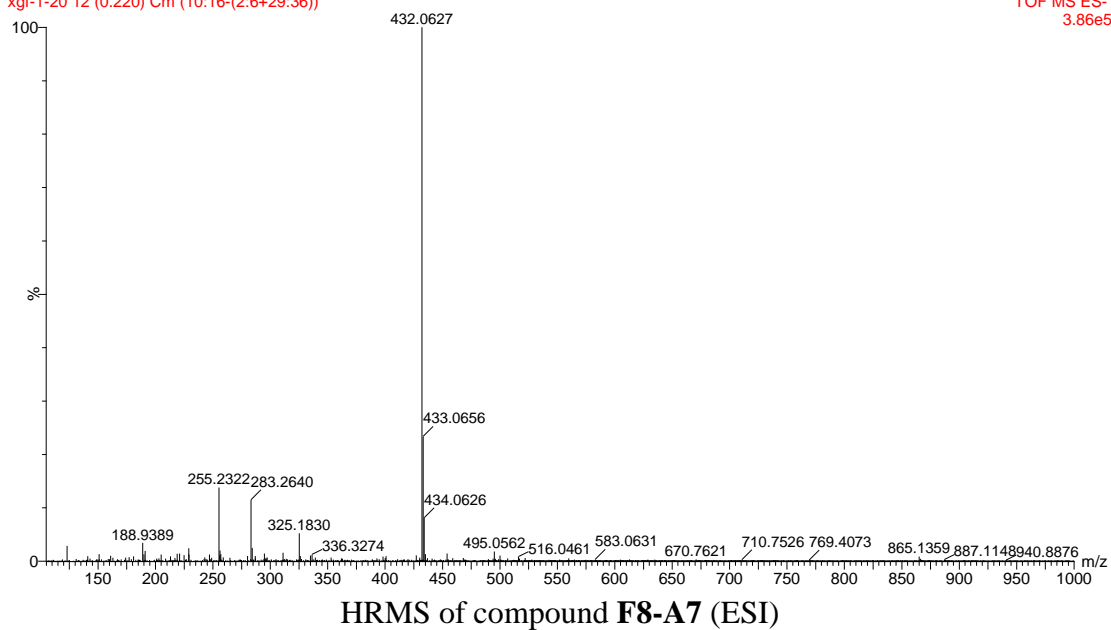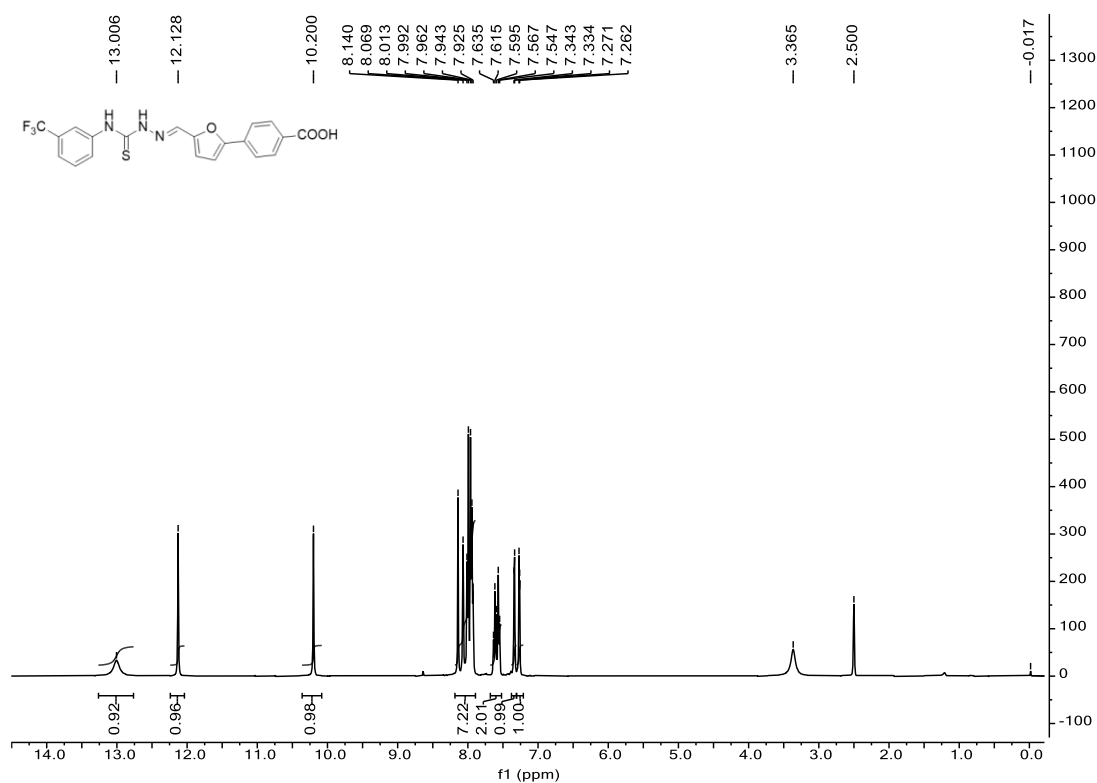

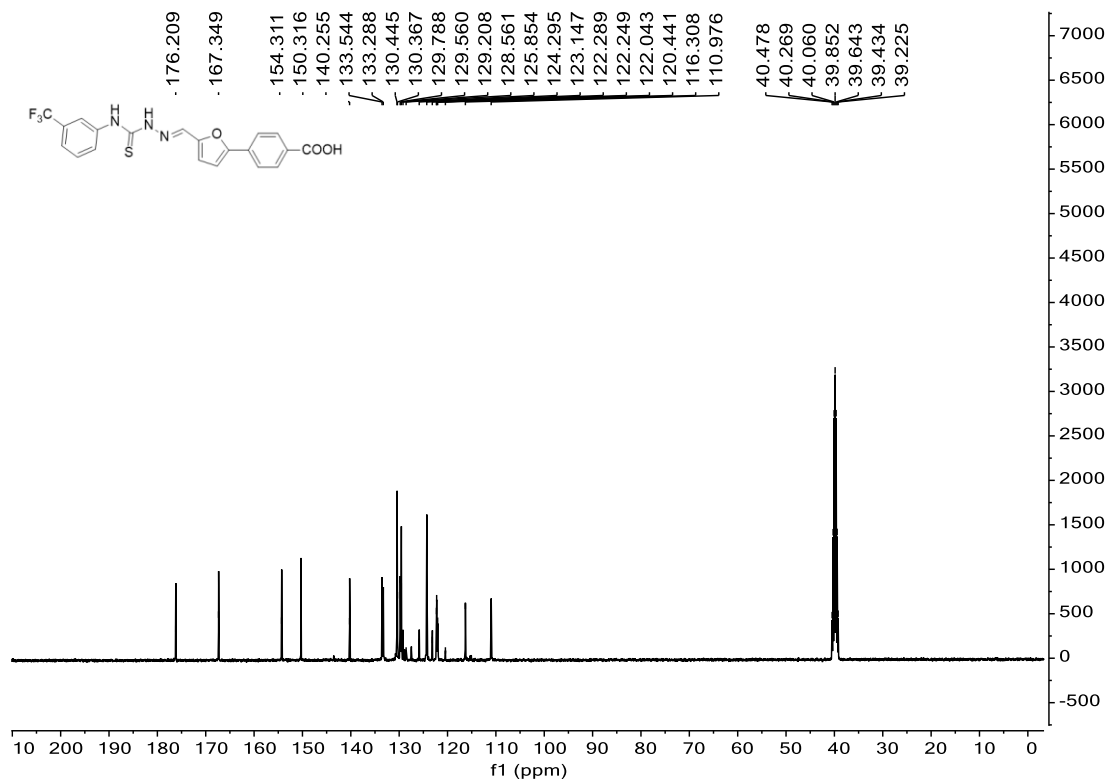

<sup>13</sup>C NMR of compound **F8-A8** (400 MHz, DMSO-*d*<sub>6</sub>)

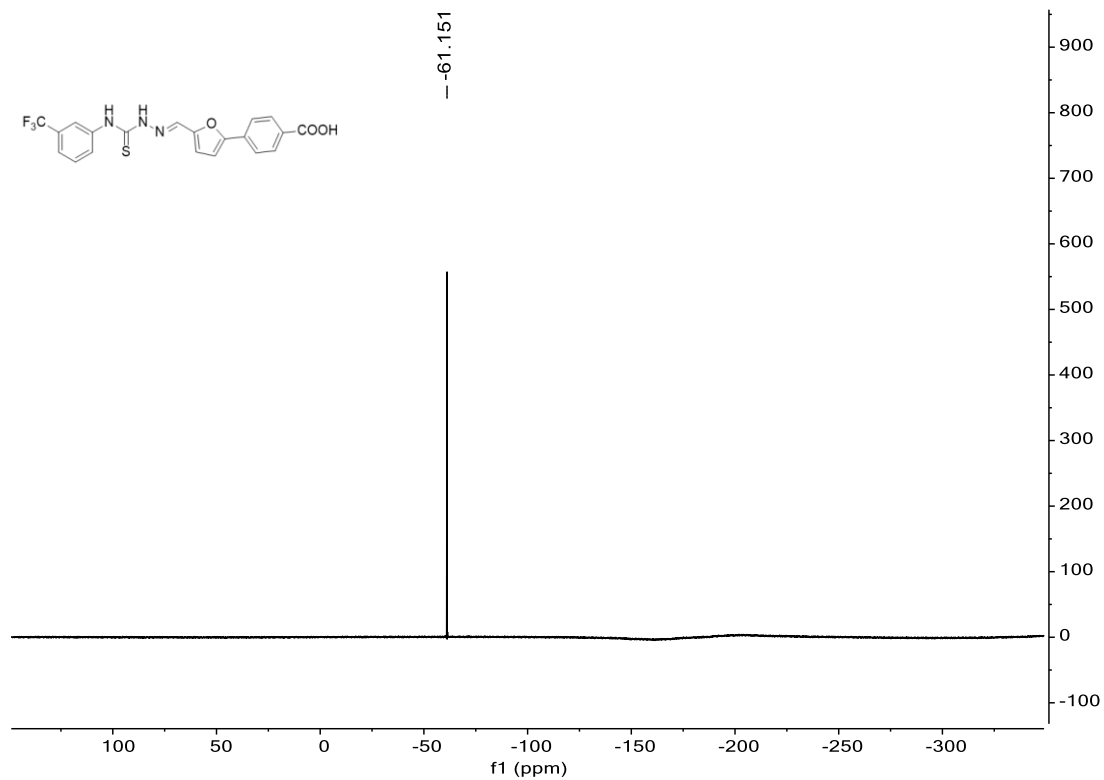

<sup>19</sup>F NMR of compound **F8-A8** (376 MHz, DMSO-*d*<sub>6</sub>)



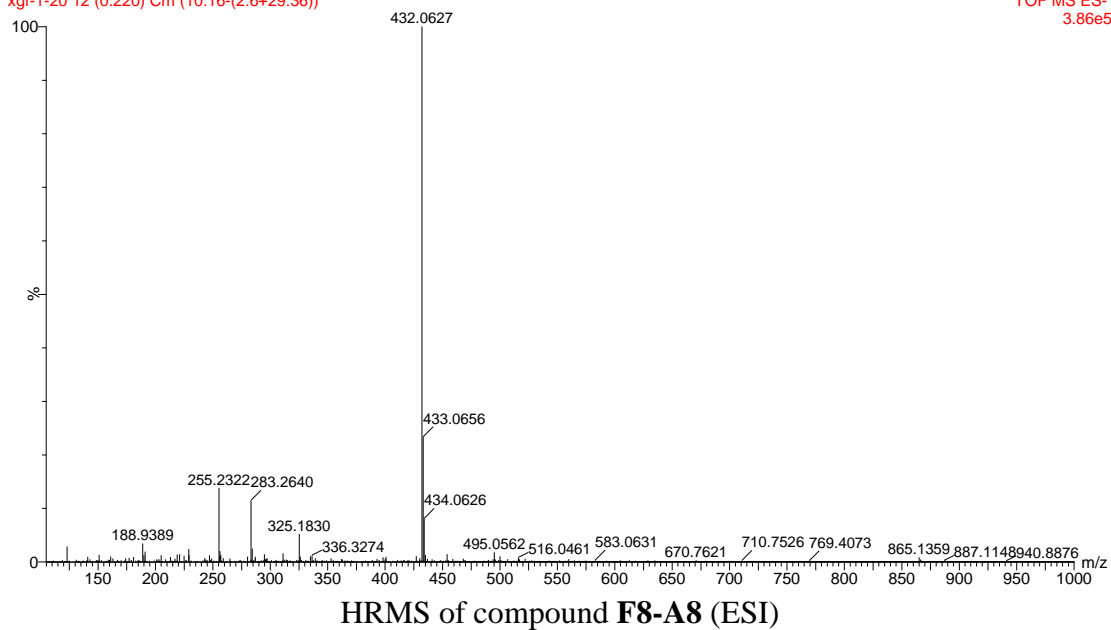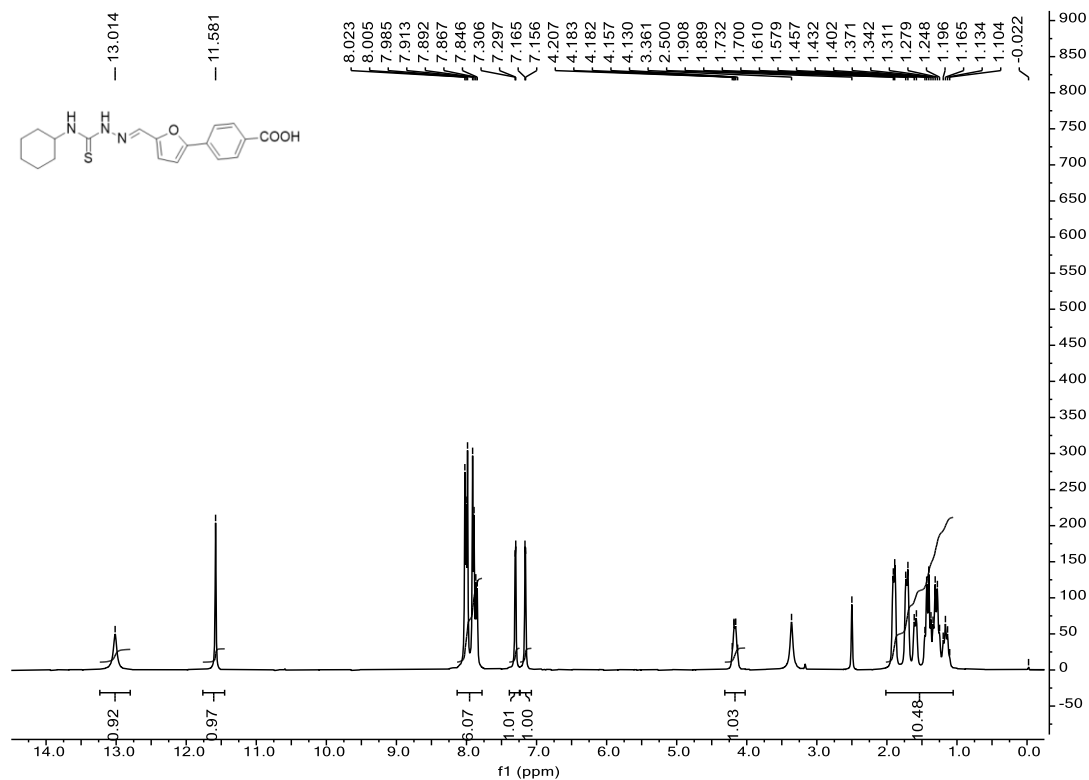

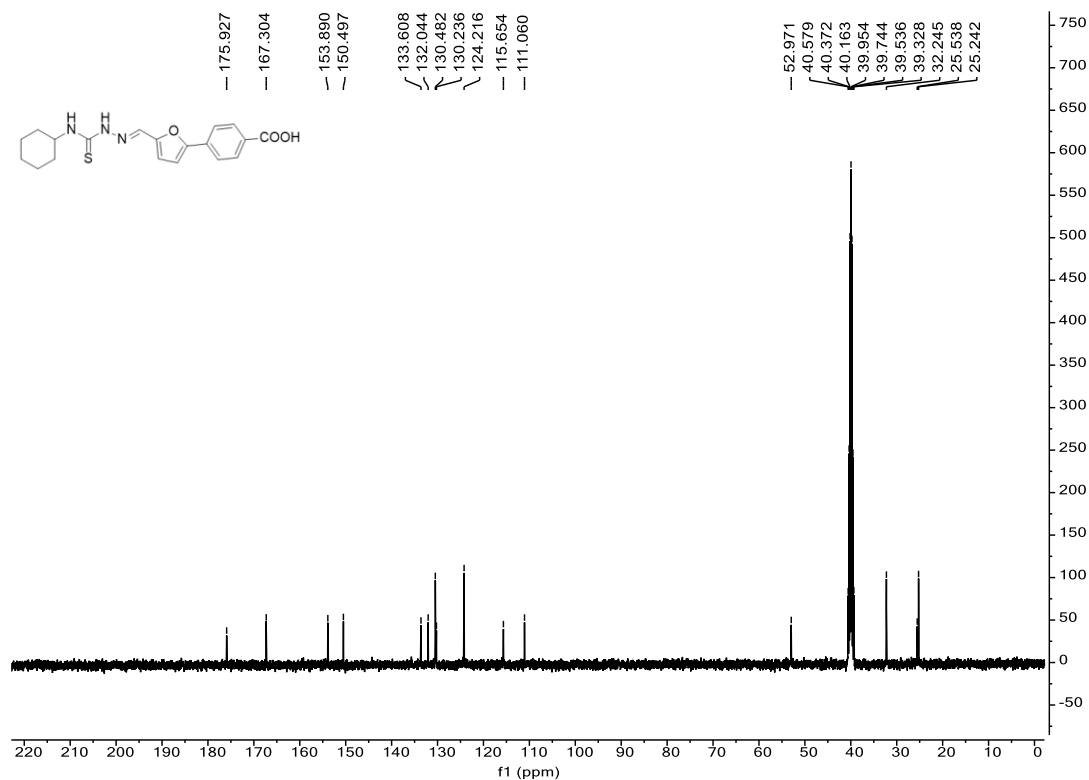

$^{13}\text{C}$  NMR of compound **F8-A9** (100 MHz, DMSO- $d_6$ )

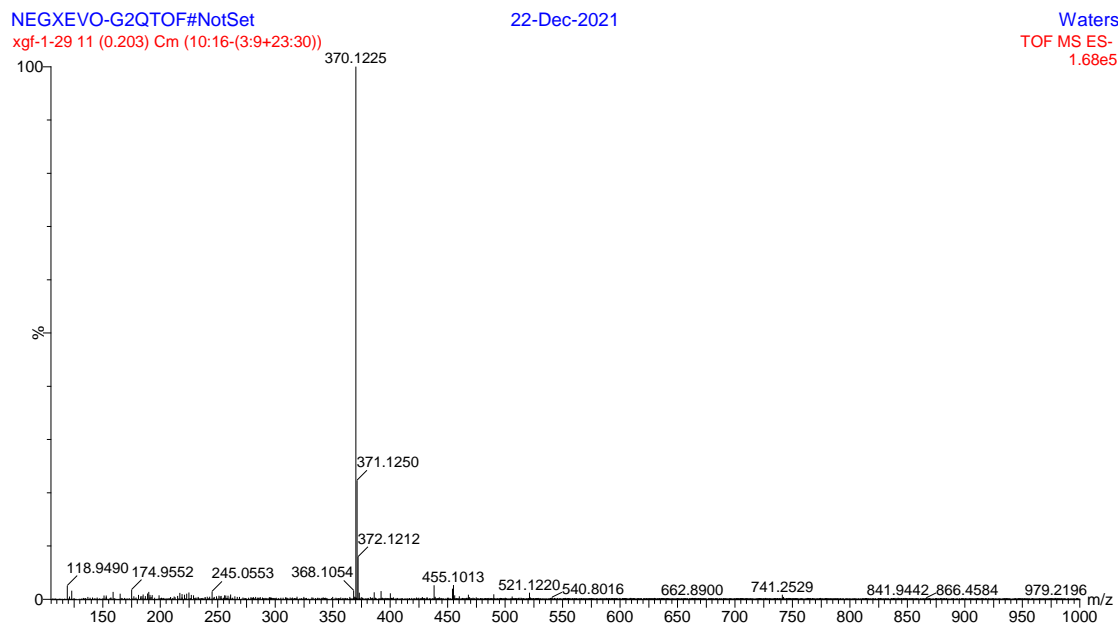

HRMS of compound **F8-A9** (ESI)

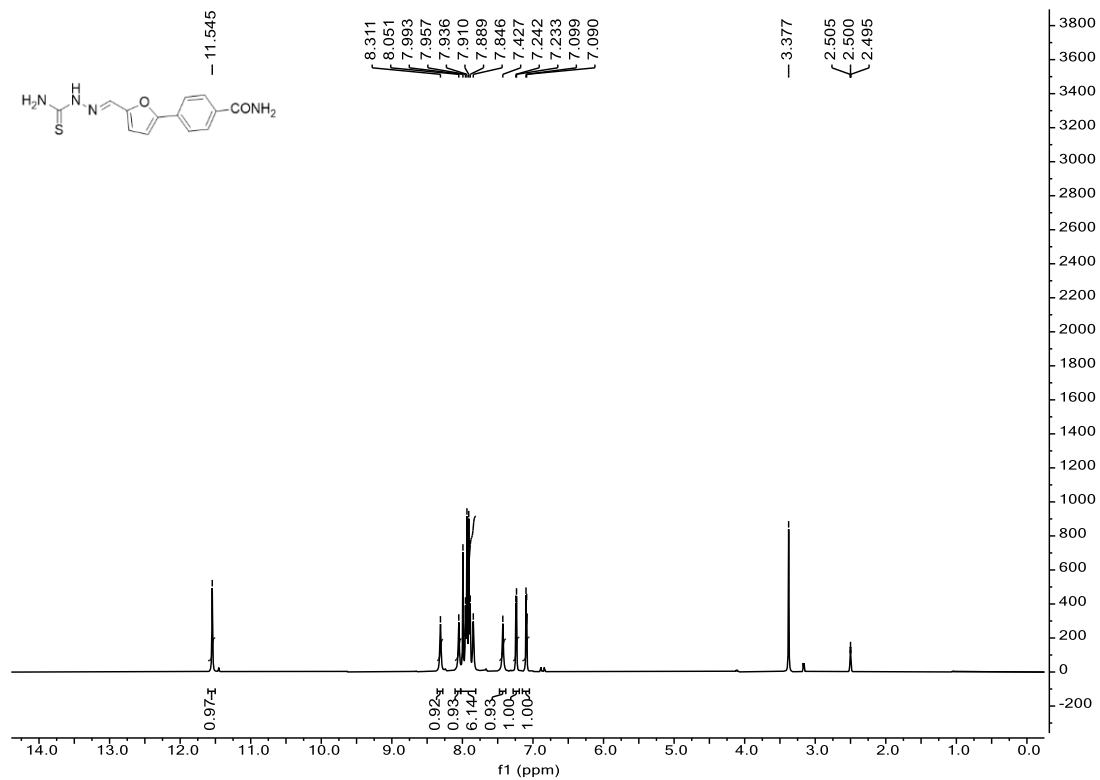

<sup>1</sup>H NMR of compound **F8-B1** (400 MHz, DMSO-*d*<sub>6</sub>)

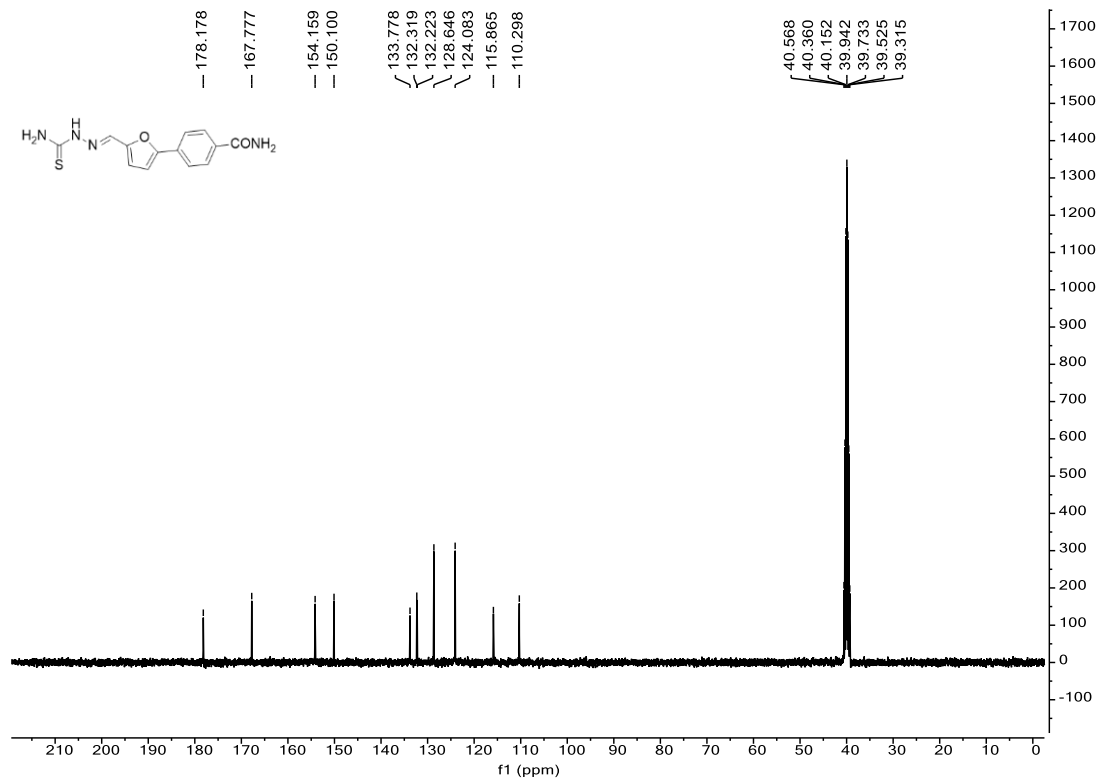

<sup>13</sup>C NMR of compound **F8-B1** (100 MHz, DMSO-*d*<sub>6</sub>)

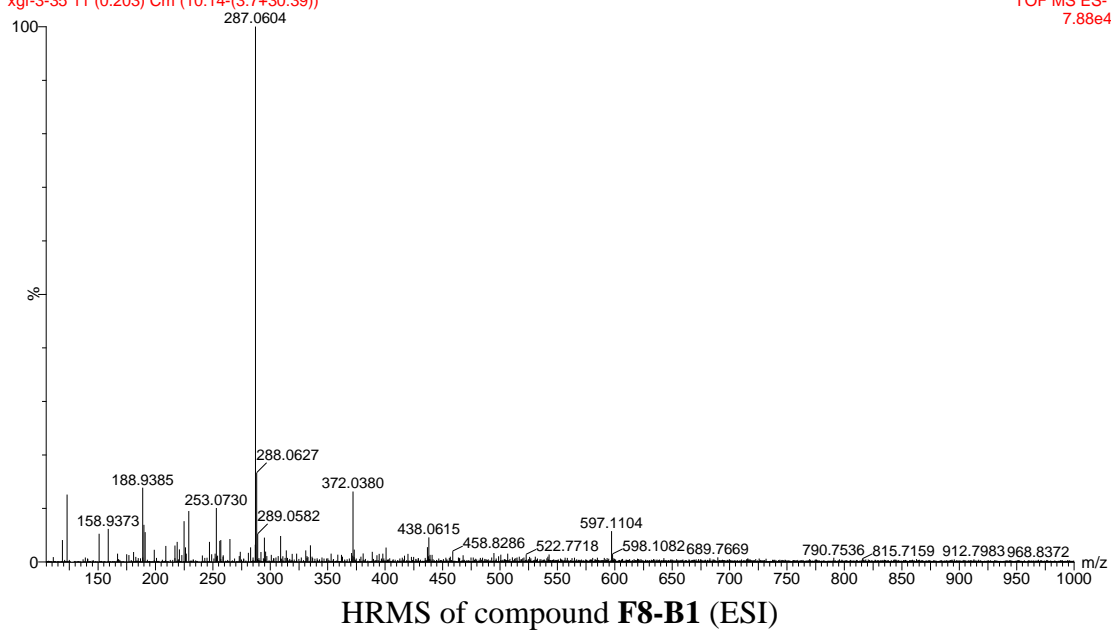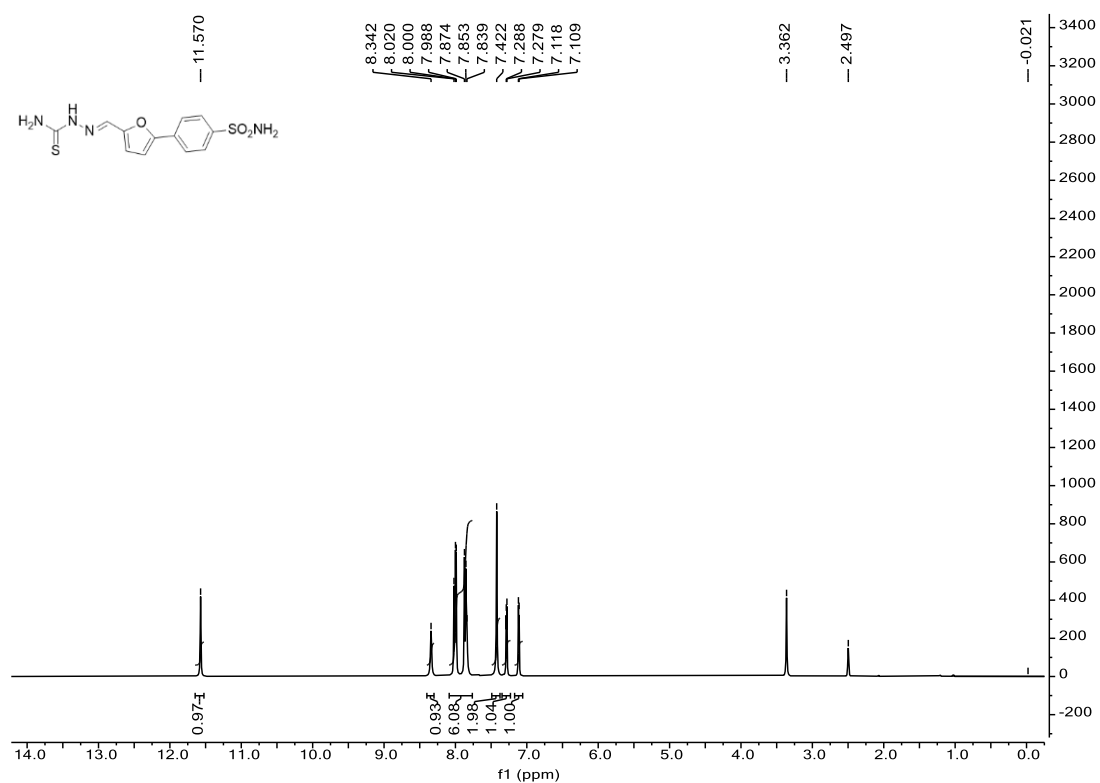

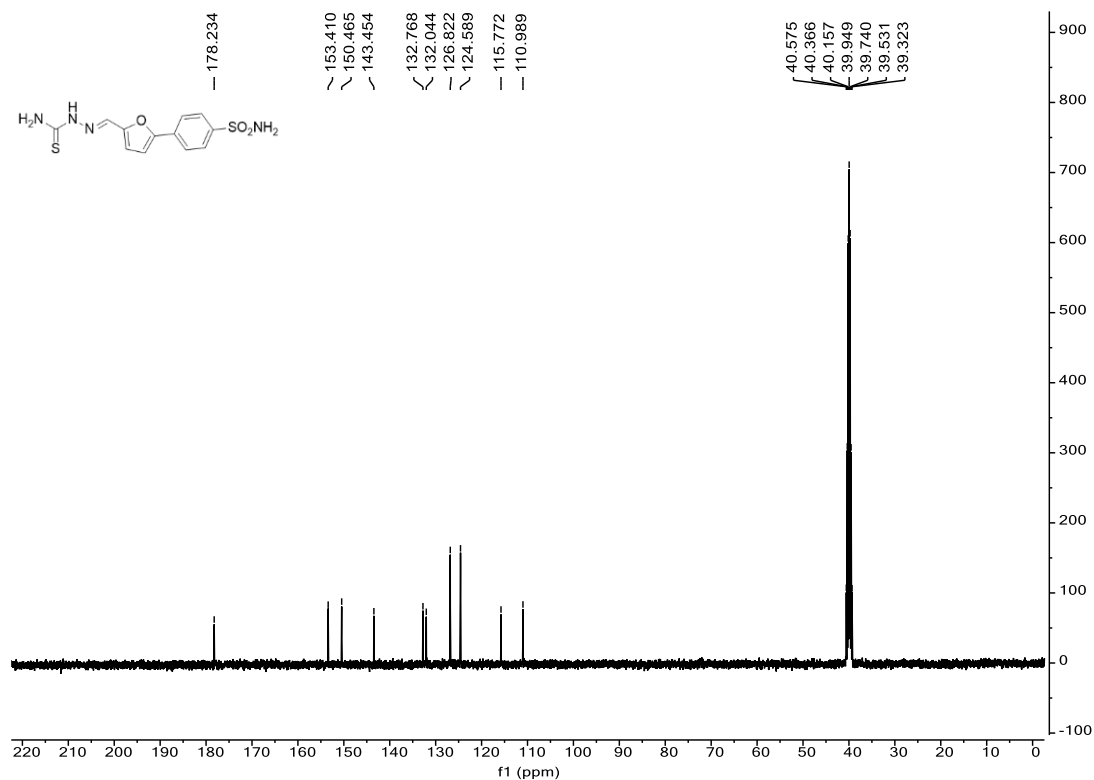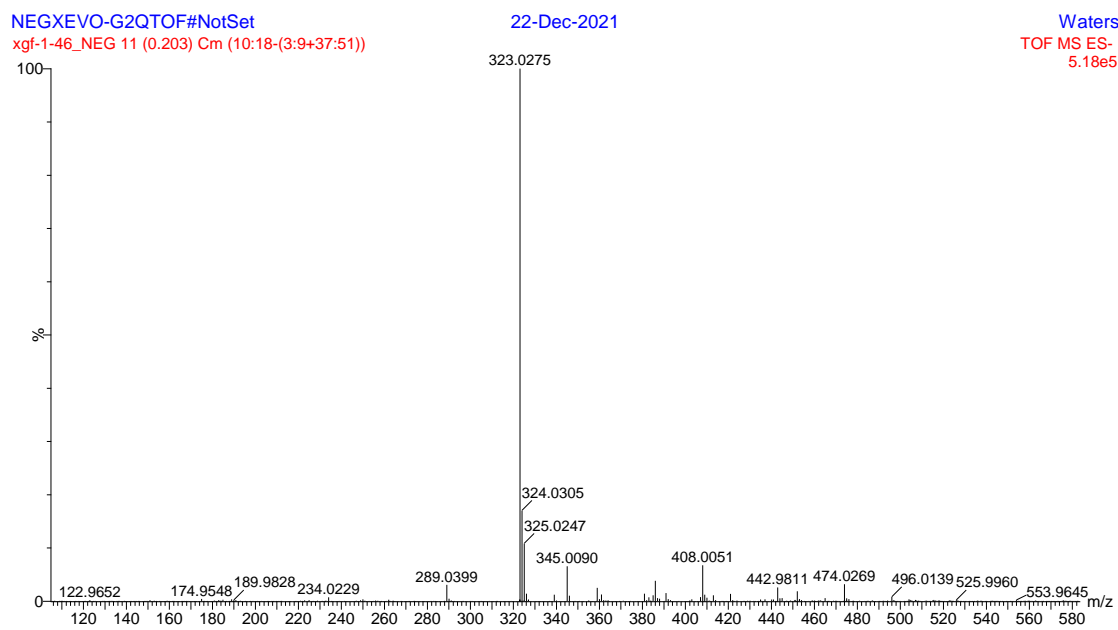

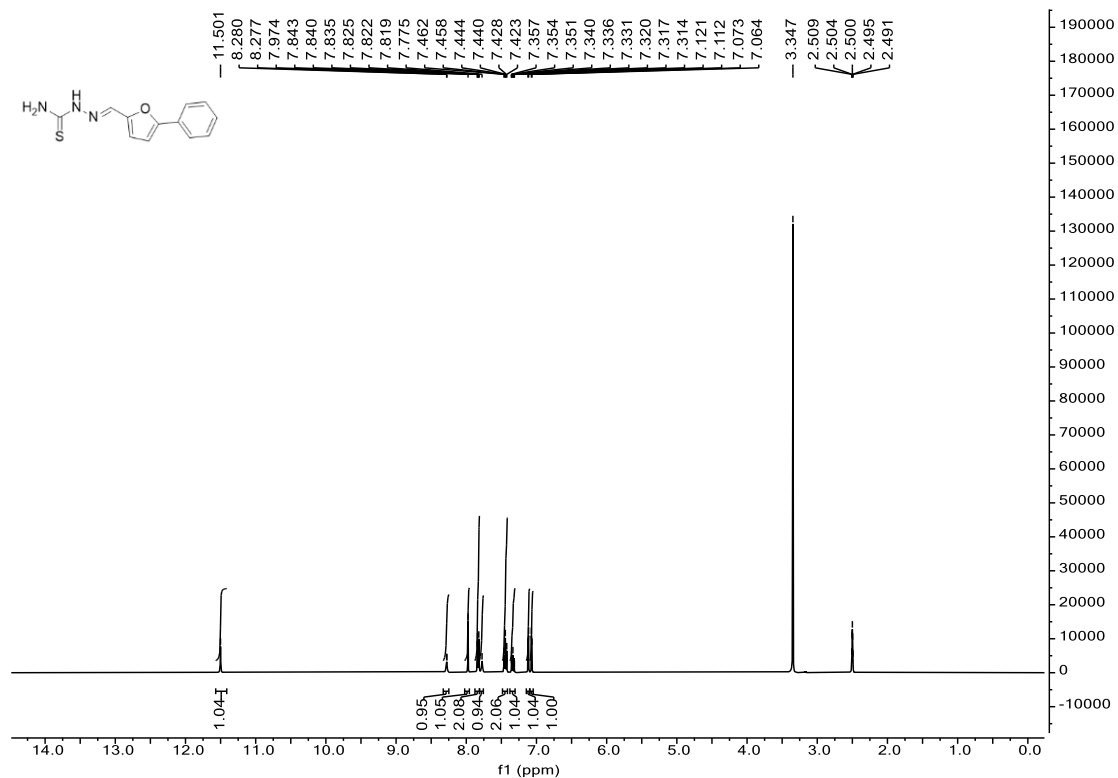

<sup>1</sup>H NMR of compound **F8-B3** (400 MHz, DMSO-*d*<sub>6</sub>)

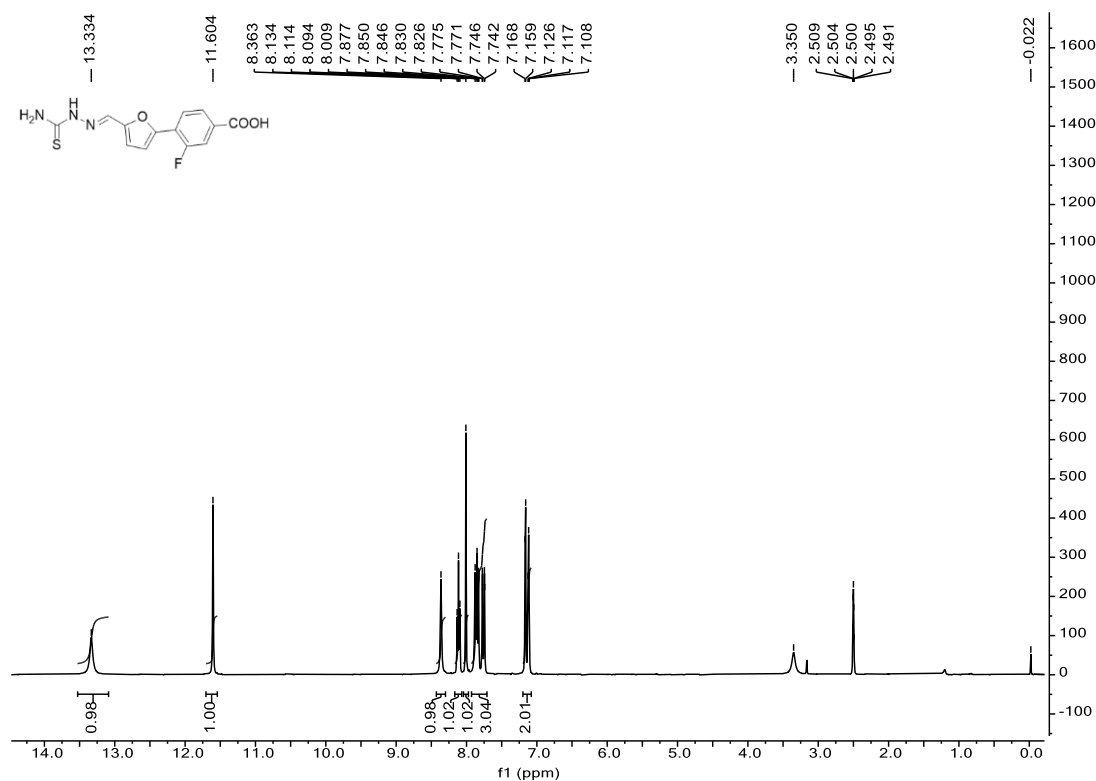

<sup>1</sup>H NMR of compound **F8-B4** (400 MHz, DMSO-*d*<sub>6</sub>)

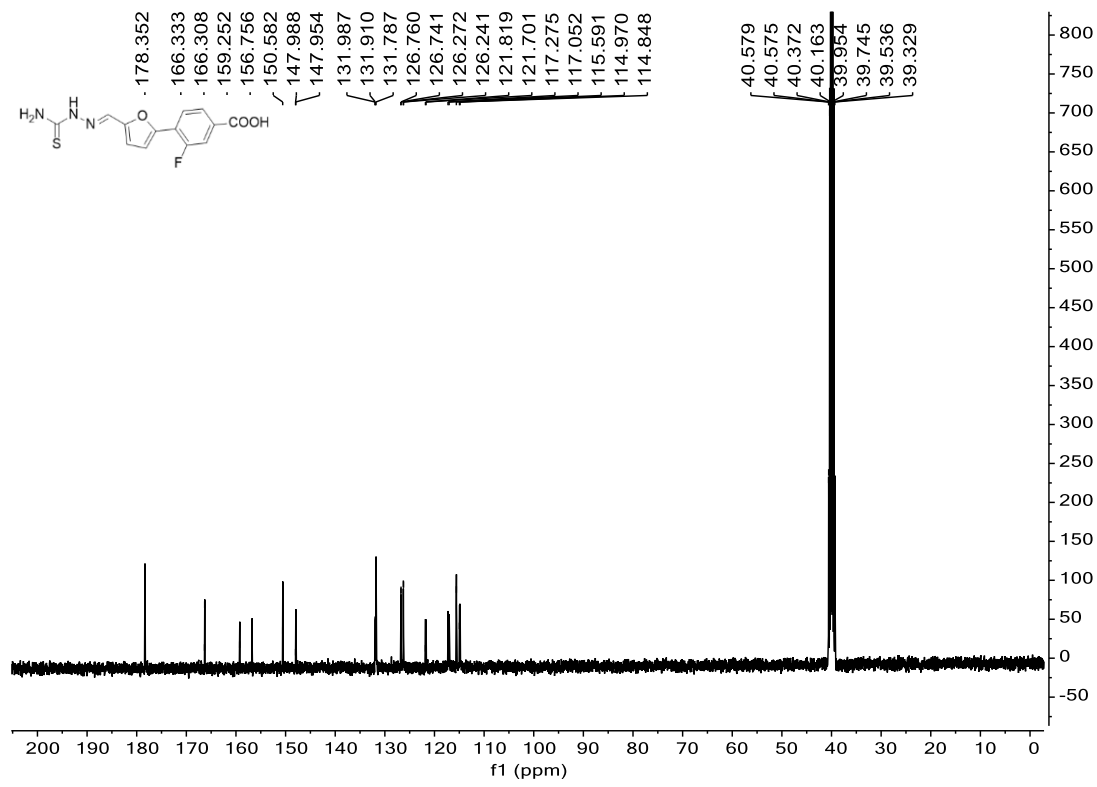

<sup>13</sup>C NMR of compound **F8-B4** ((100 MHz, DMSO-*d*<sub>6</sub>)

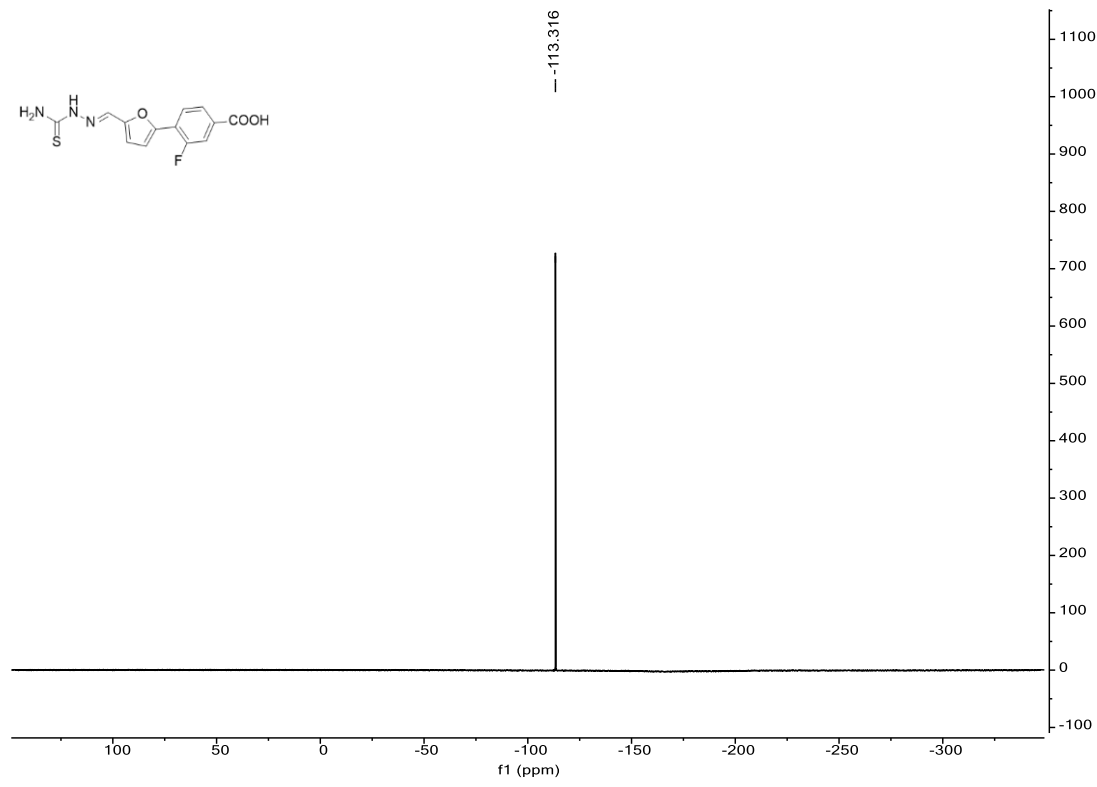

<sup>19</sup>F NMR of compound **F8-B4** (376 MHz, DMSO-*d*<sub>6</sub>)

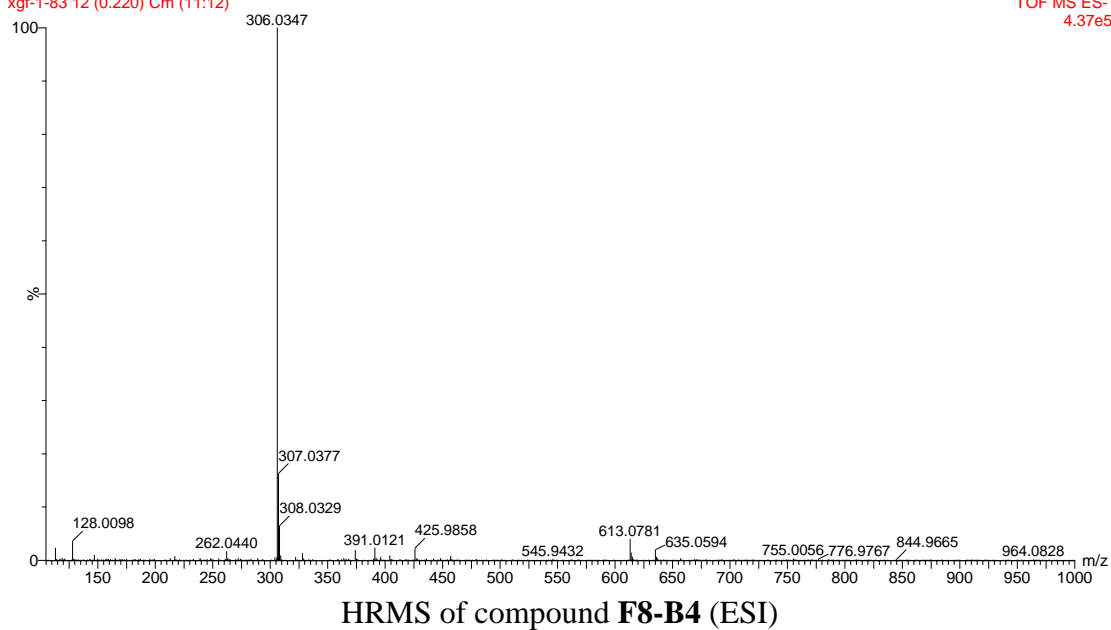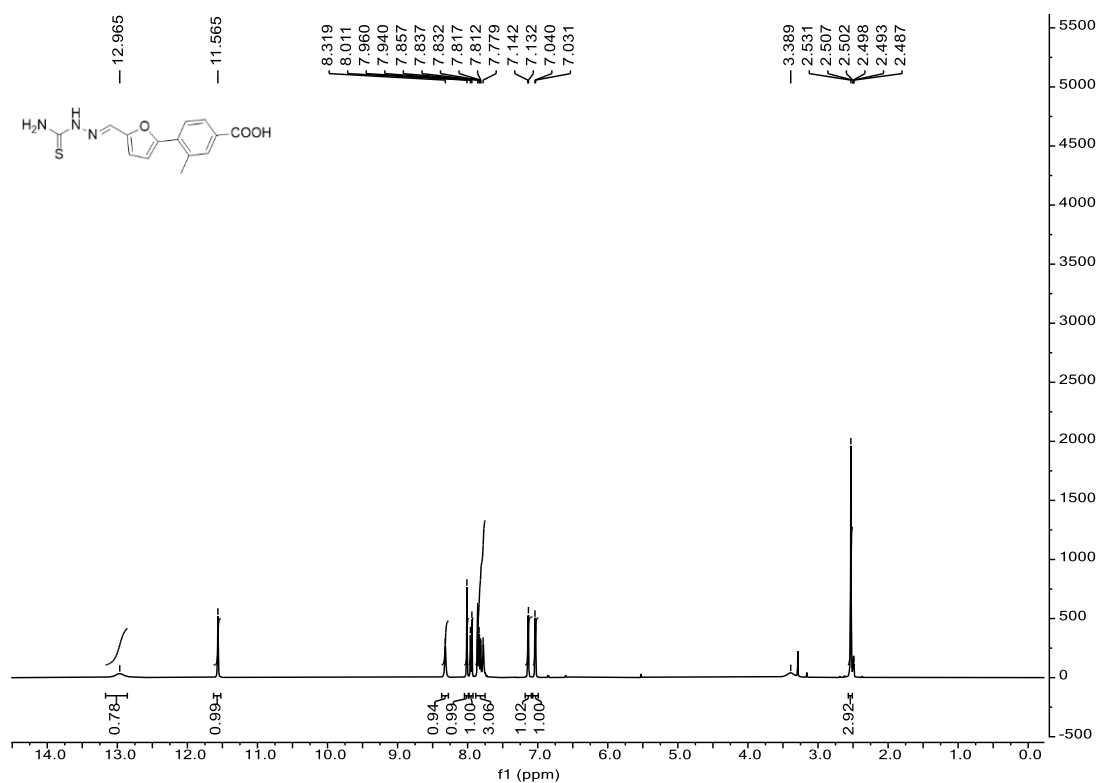



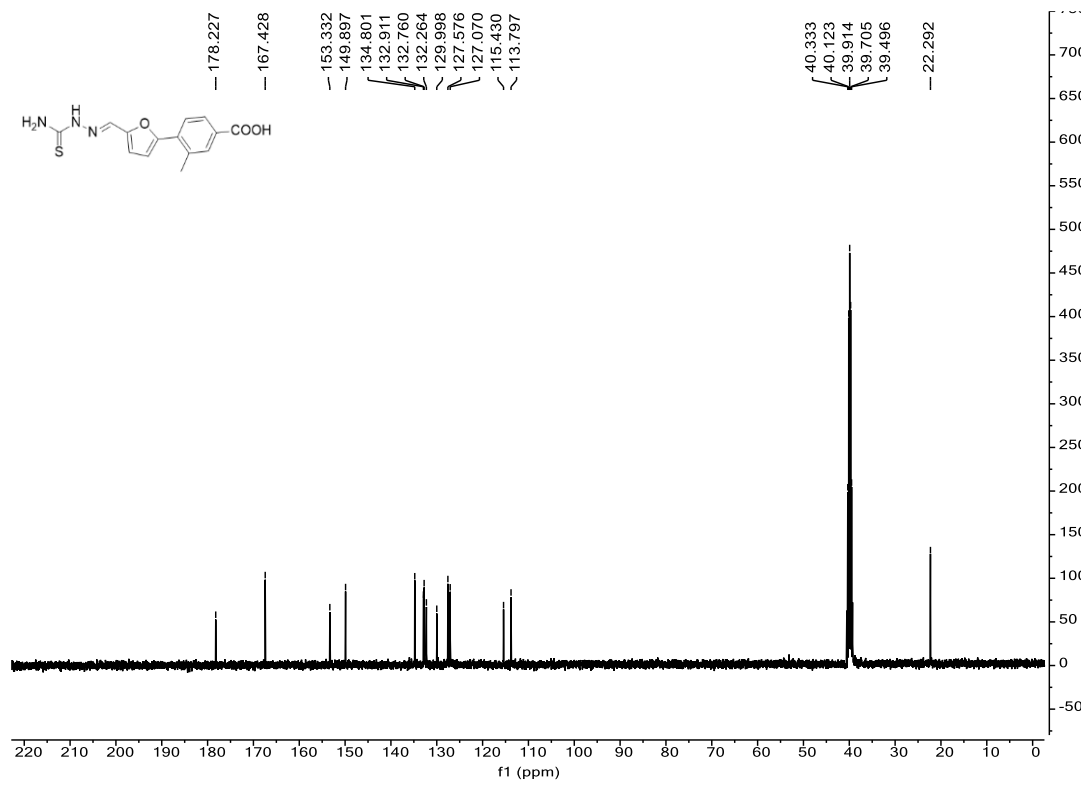

<sup>13</sup>C NMR of compound **F8-B5** ((100 MHz, DMSO-*d*<sub>6</sub>)

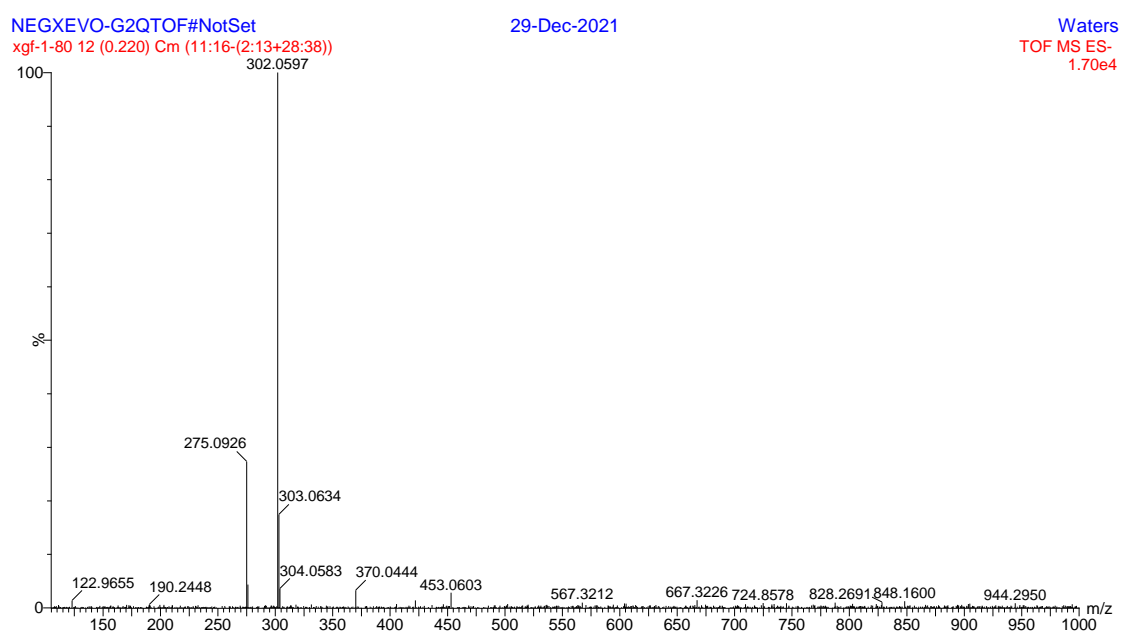

HRMS of compound **F8-B5** (ESI)

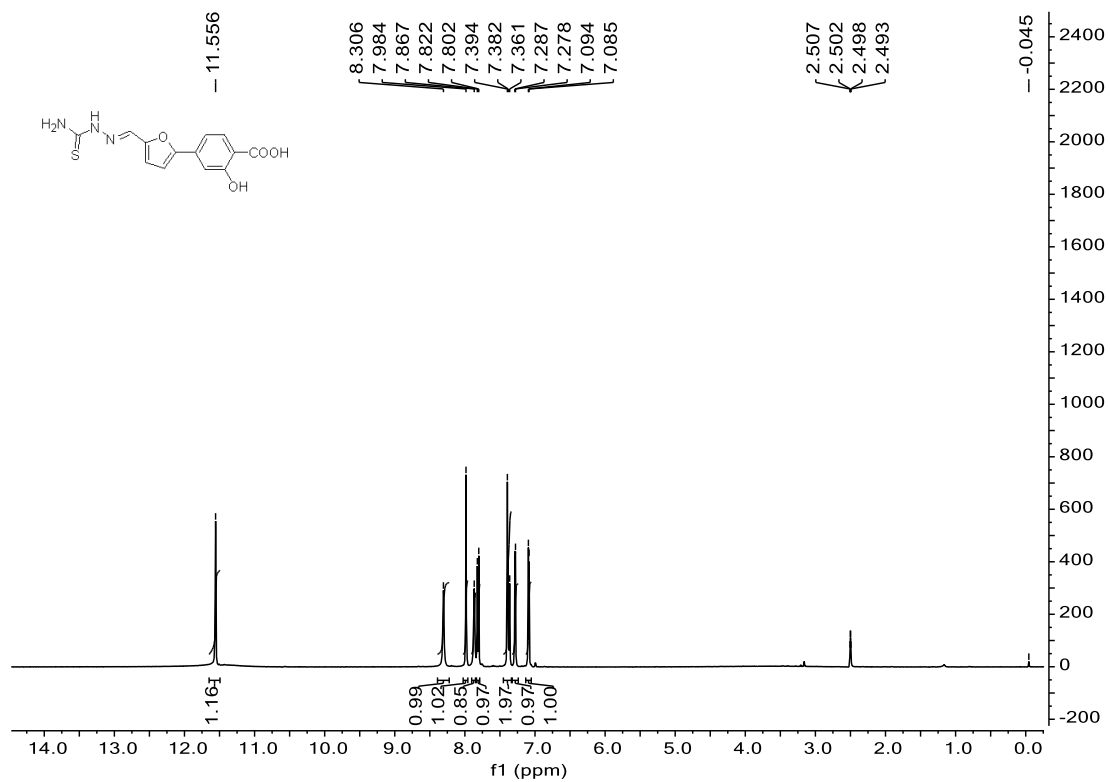

<sup>1</sup>H NMR of compound **F8-B6** (400 MHz, DMSO-*d*<sub>6</sub>)

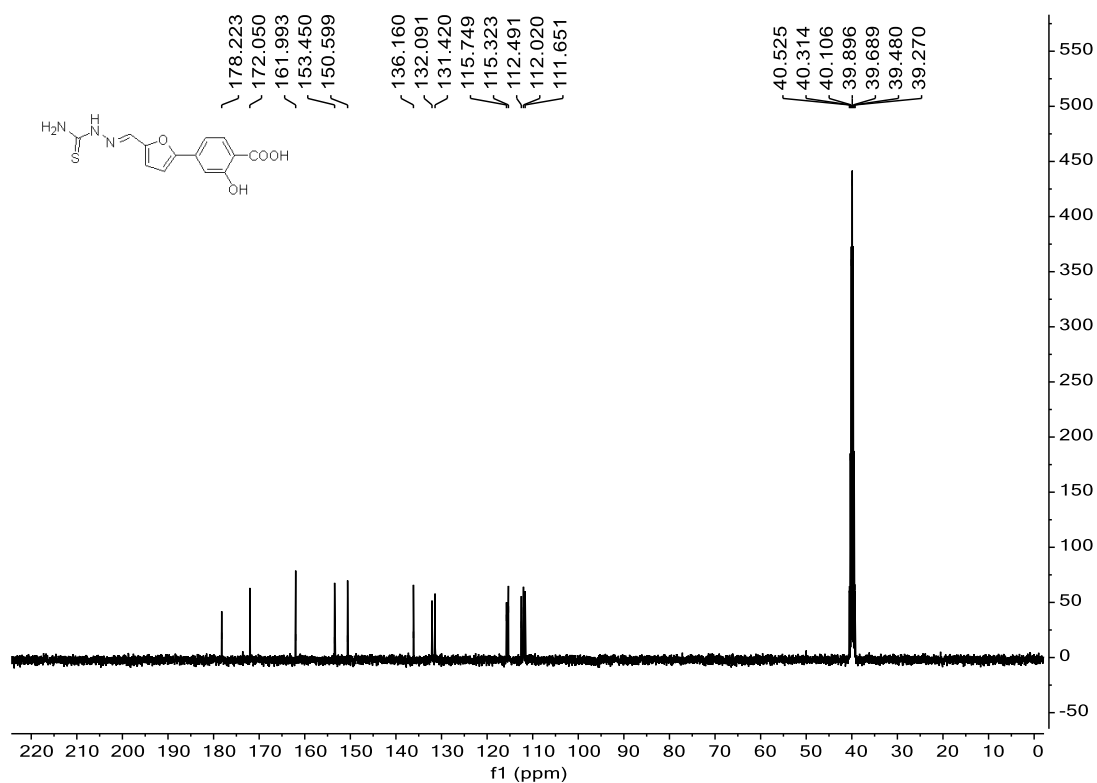

<sup>13</sup>C NMR of compound **F8-B6** ((100 MHz, DMSO-*d*<sub>6</sub>)

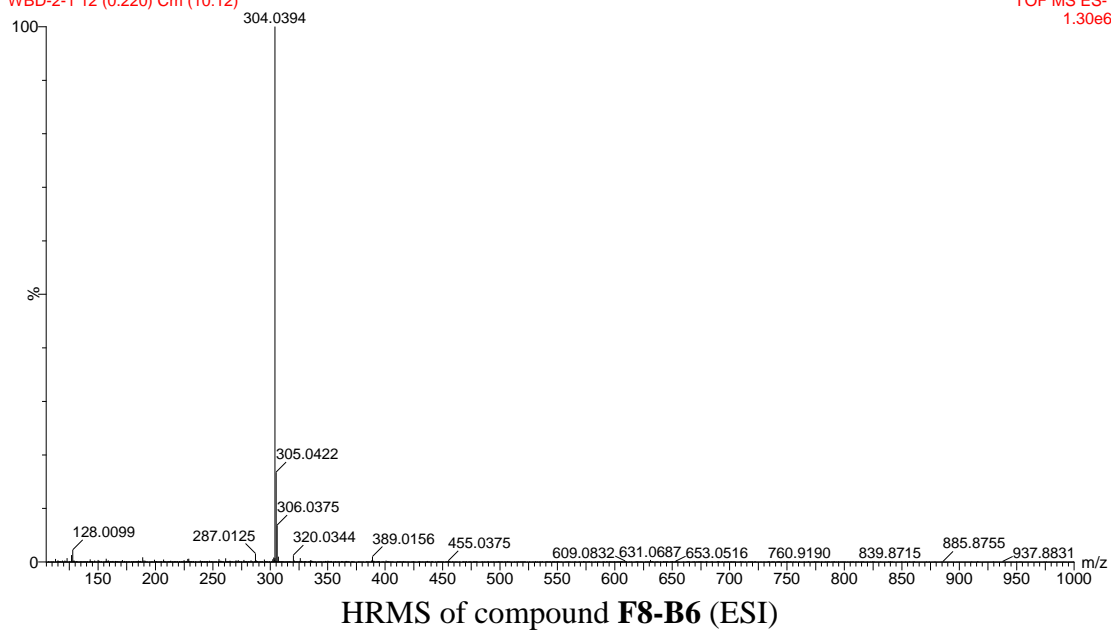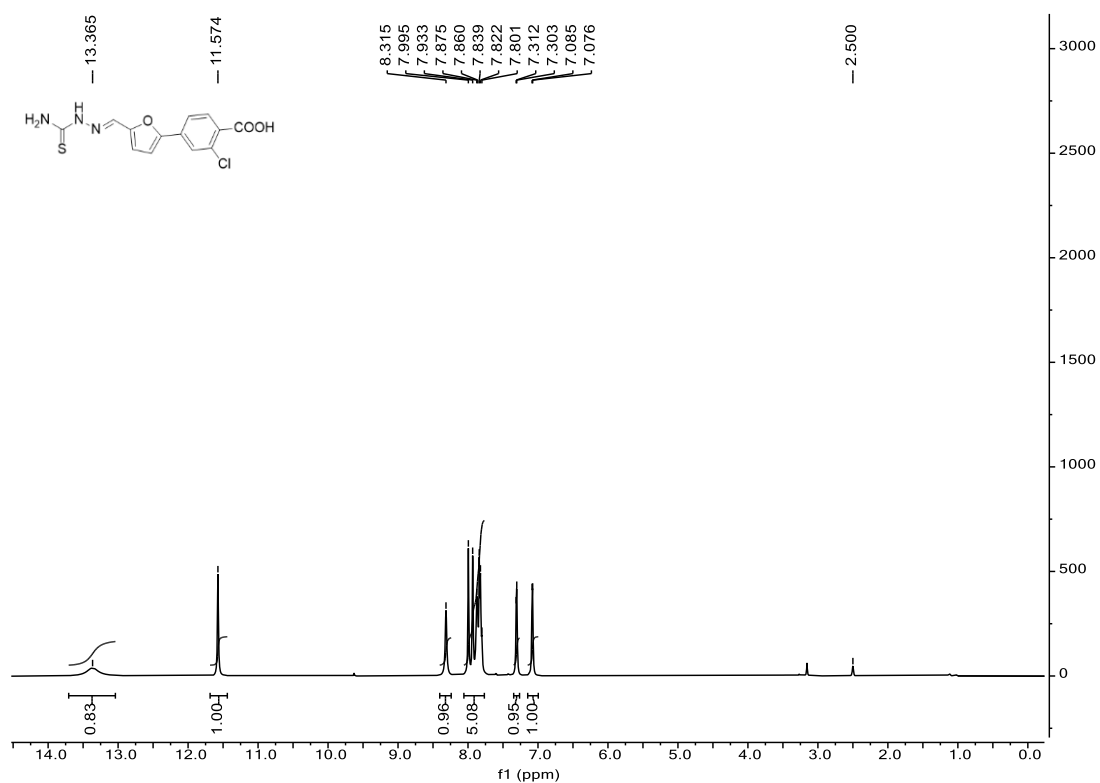

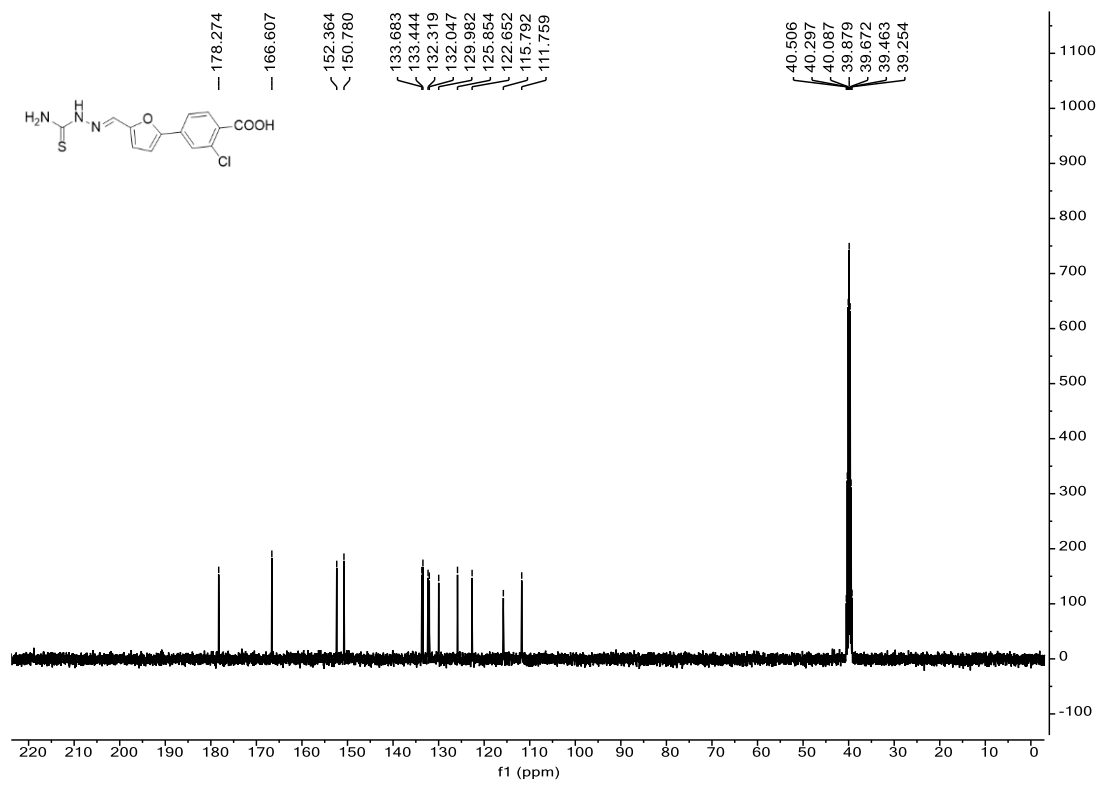

<sup>13</sup>C NMR of compound **F8-B7** ((100 MHz, DMSO-*d*<sub>6</sub>)

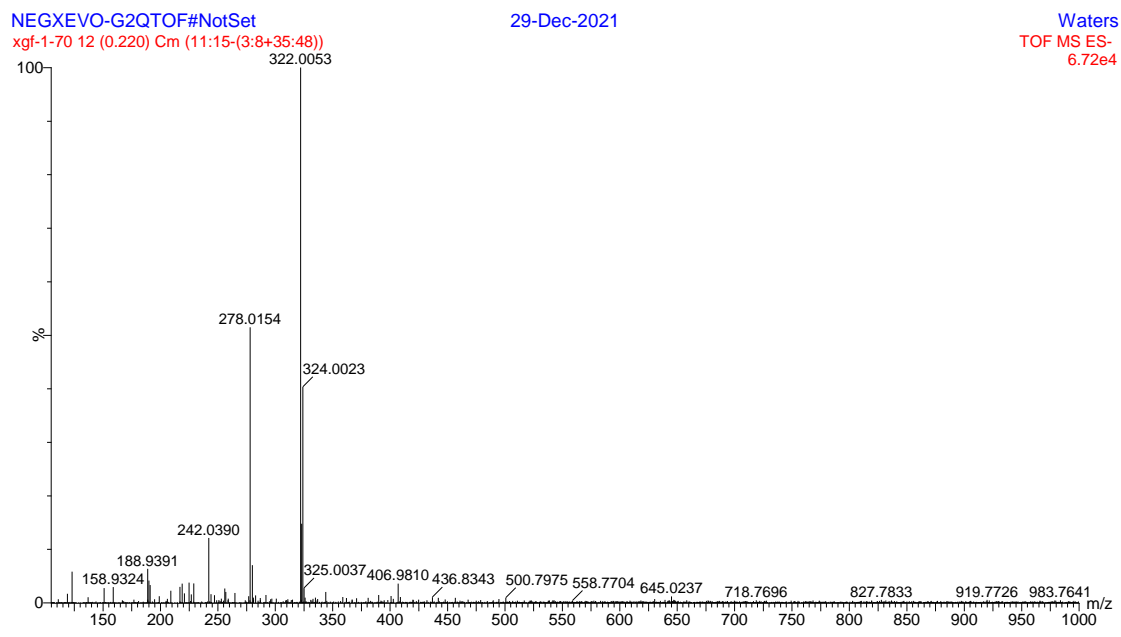

HRMS of compound **F8-B7** (ESI)

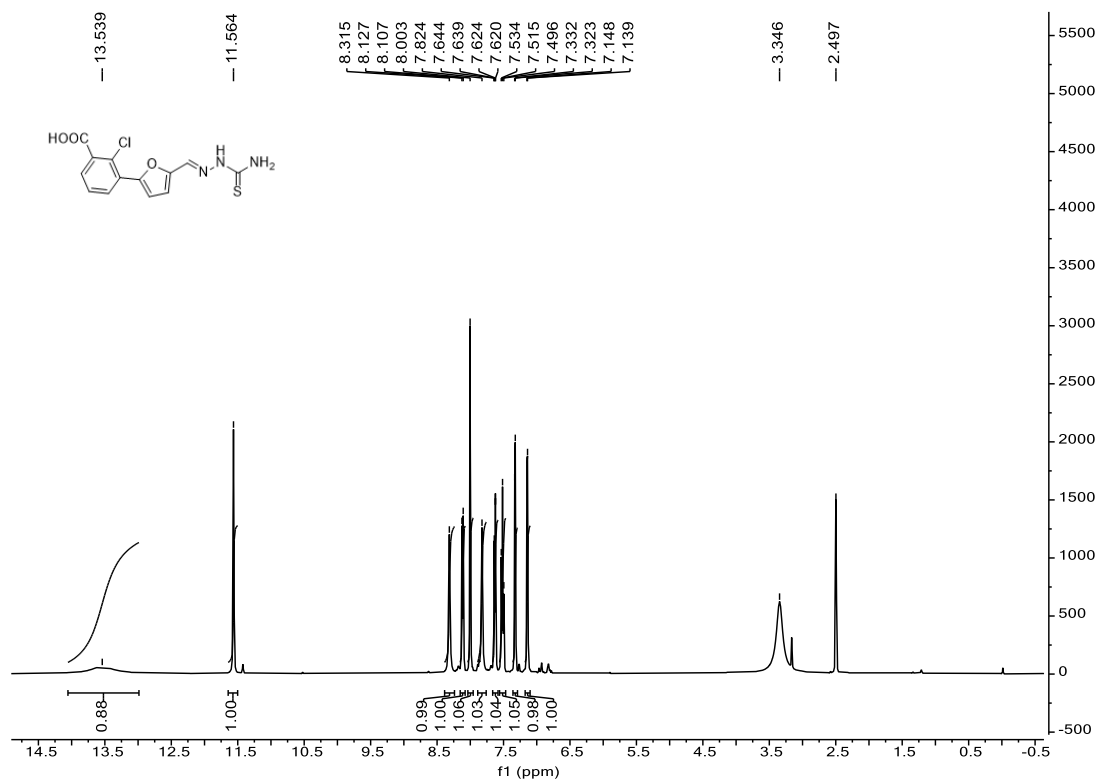

<sup>1</sup>H NMR of compound **F8-B8** (400 MHz, DMSO-*d*<sub>6</sub>)

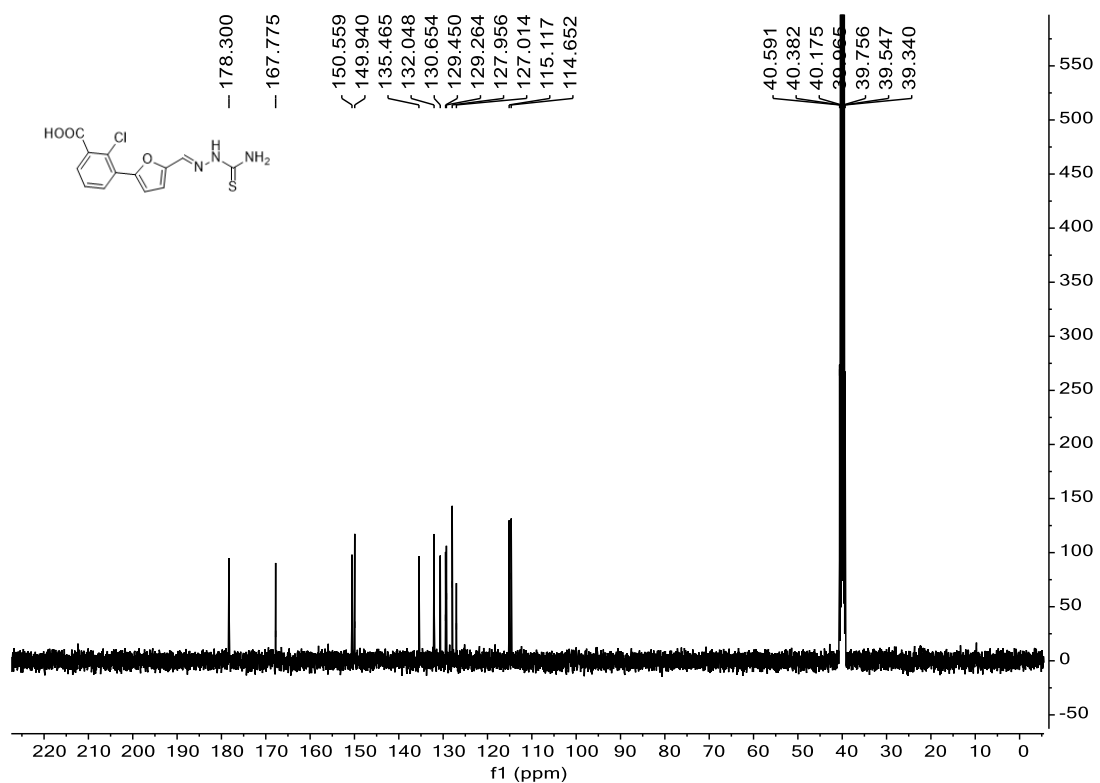

<sup>13</sup>C NMR of compound **F8-B8** ((100 MHz, DMSO-*d*<sub>6</sub>)

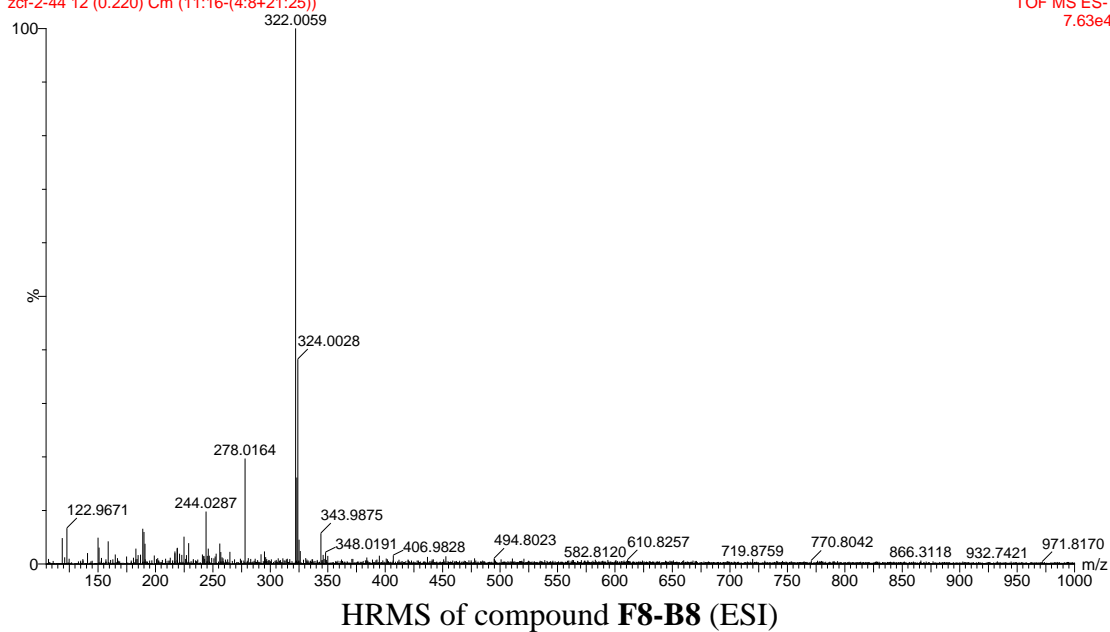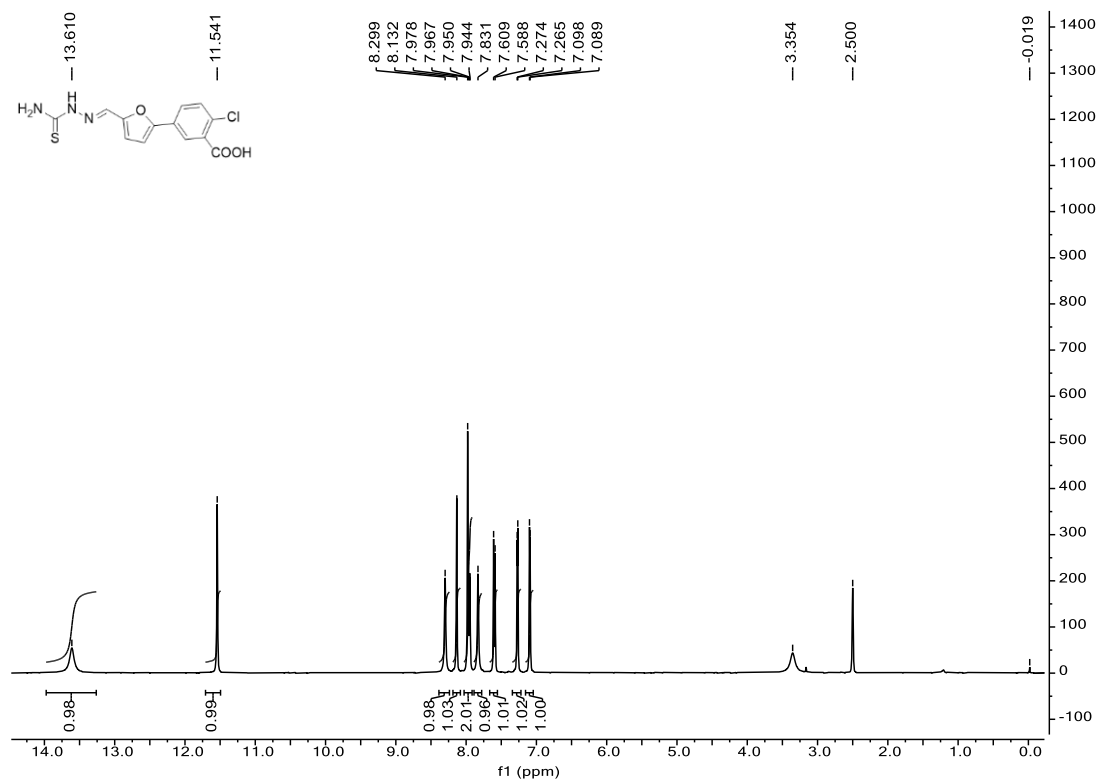

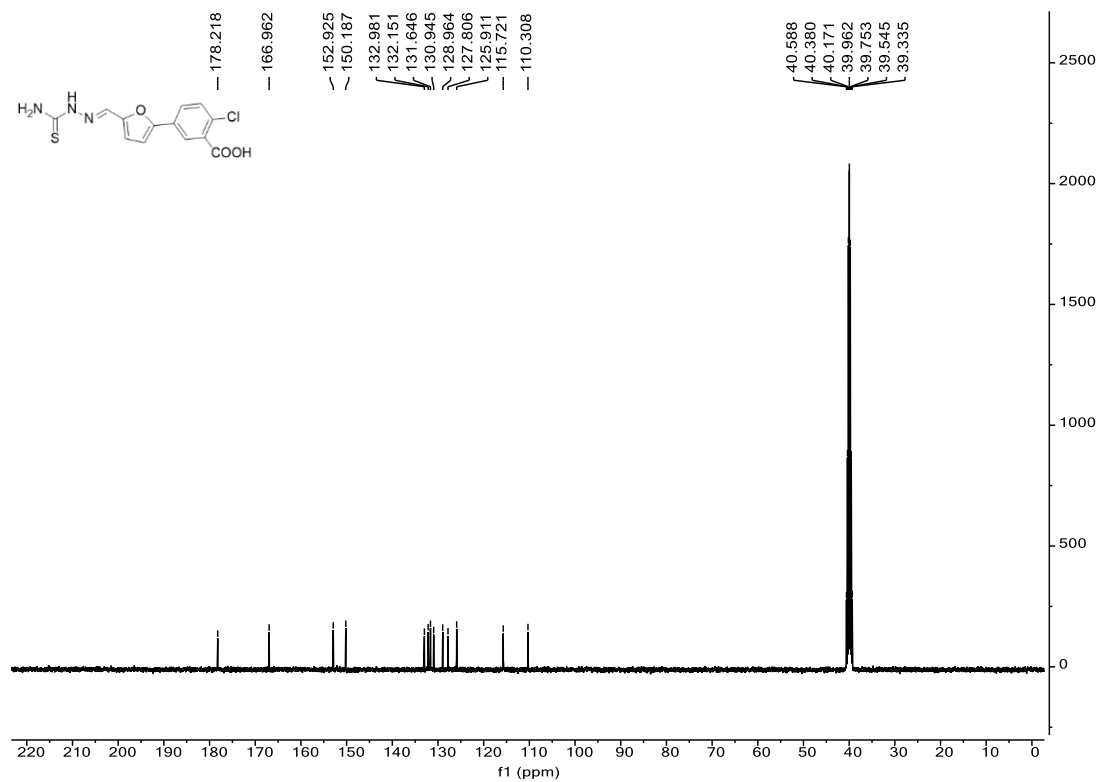

$^{13}\text{C}$  NMR of compound **F8-B9** ((100 MHz, DMSO- $d_6$ ))

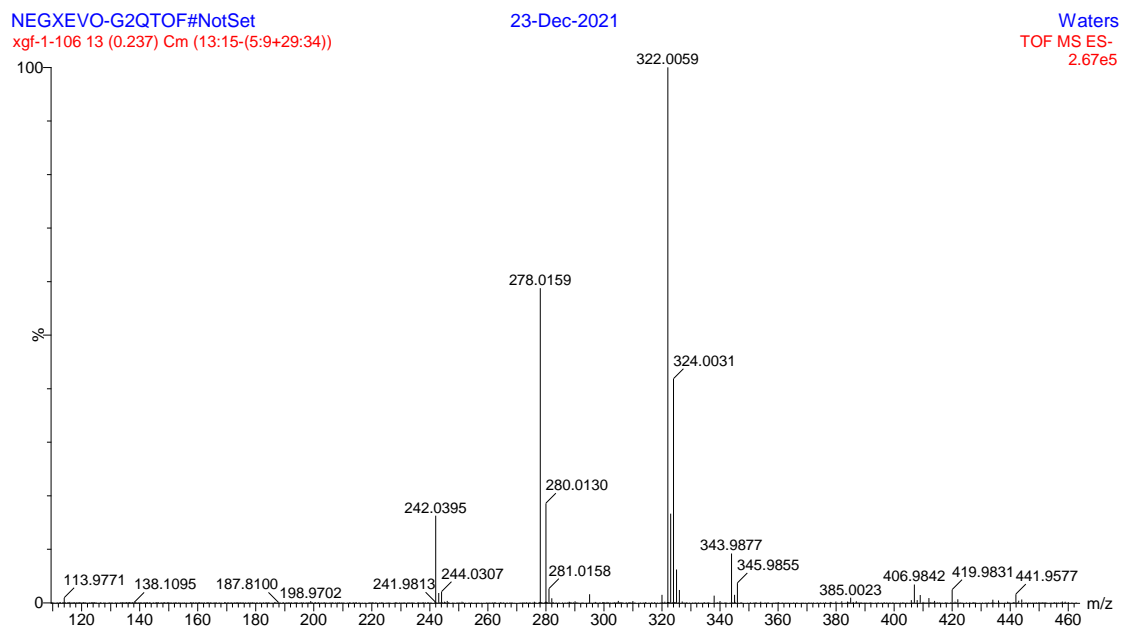

HRMS of compound **F8-B9** (ESI)

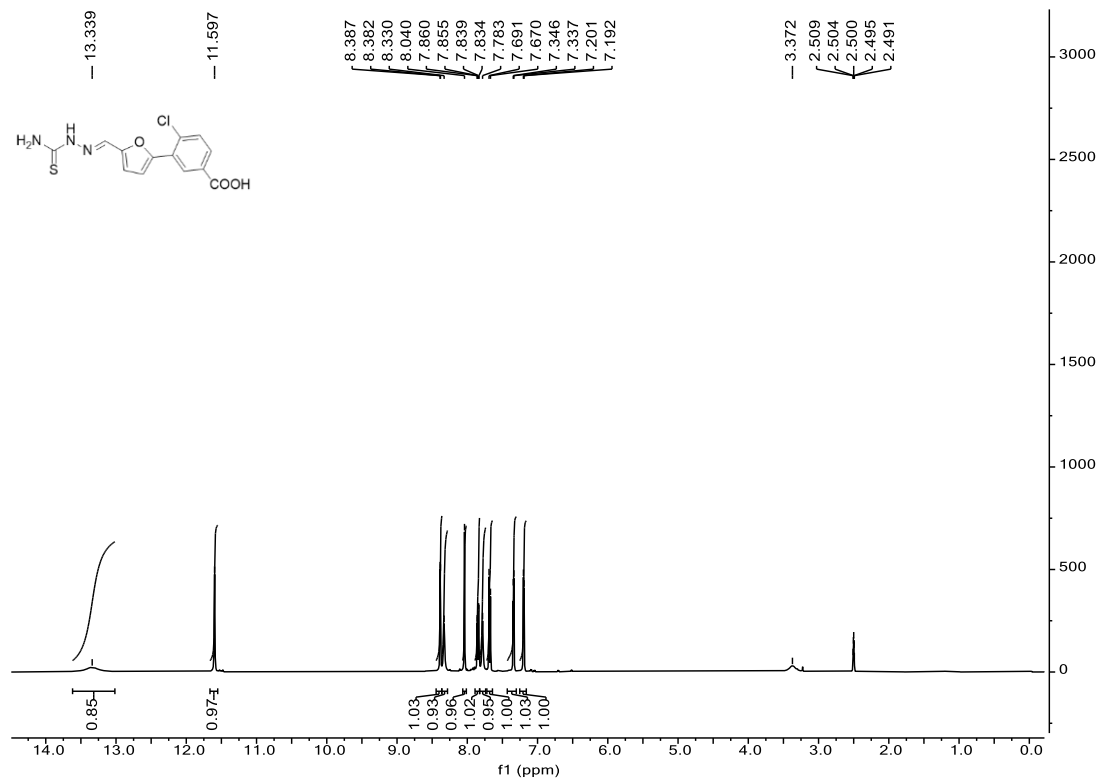

<sup>1</sup>H NMR of compound **F8-B10** (400 MHz, DMSO-*d*<sub>6</sub>)

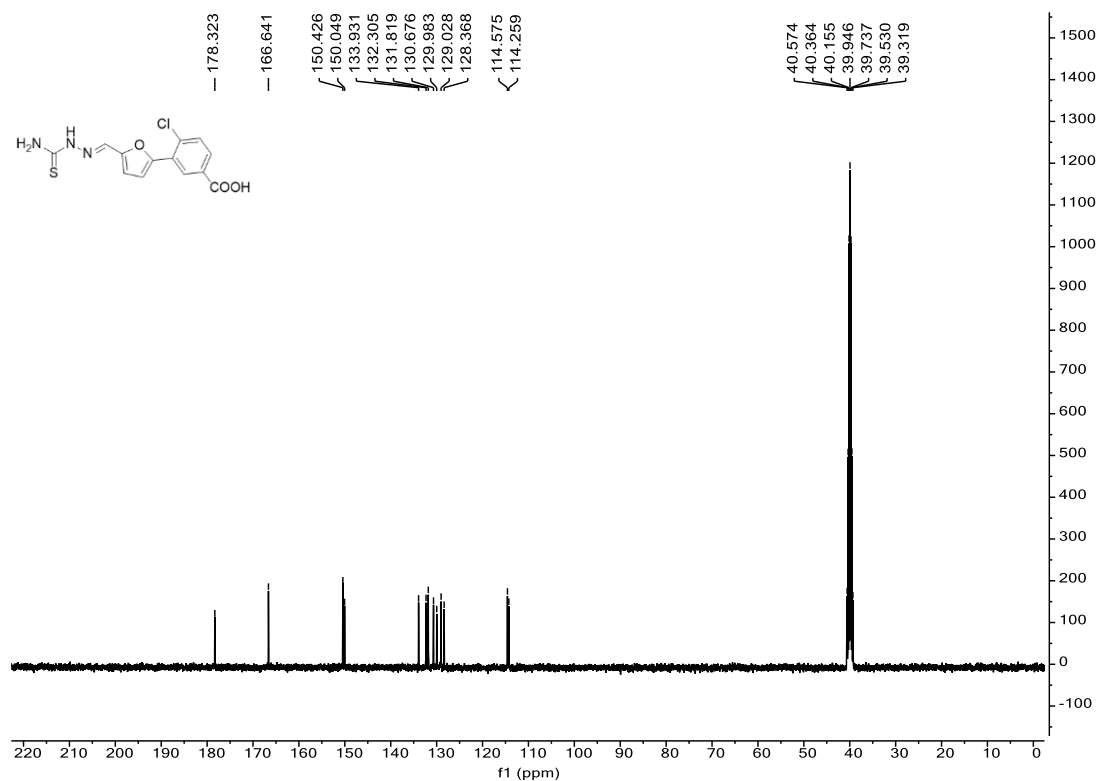

<sup>13</sup>C NMR of compound **F8-B10** ((100 MHz, DMSO-*d*<sub>6</sub>)



NEGXEVO-G2QTOF#NotSet  
xgf-1-110 12 (0.220) Cm (10:17-(2:7+24:36))

23-Dec-2021

Waters  
TOF MS ES-  
4.64e5

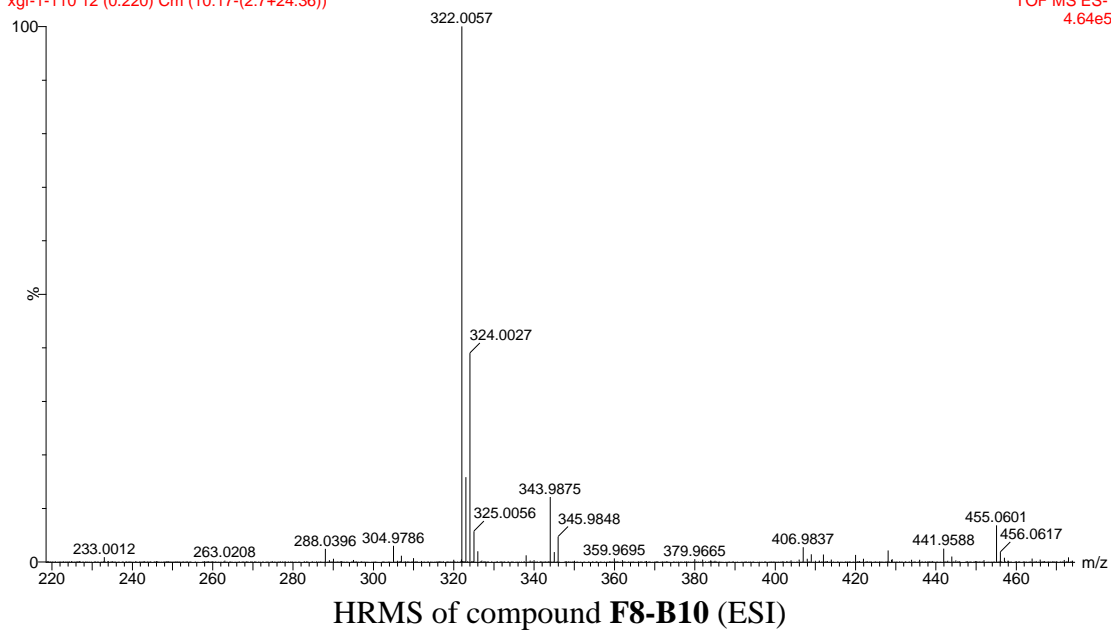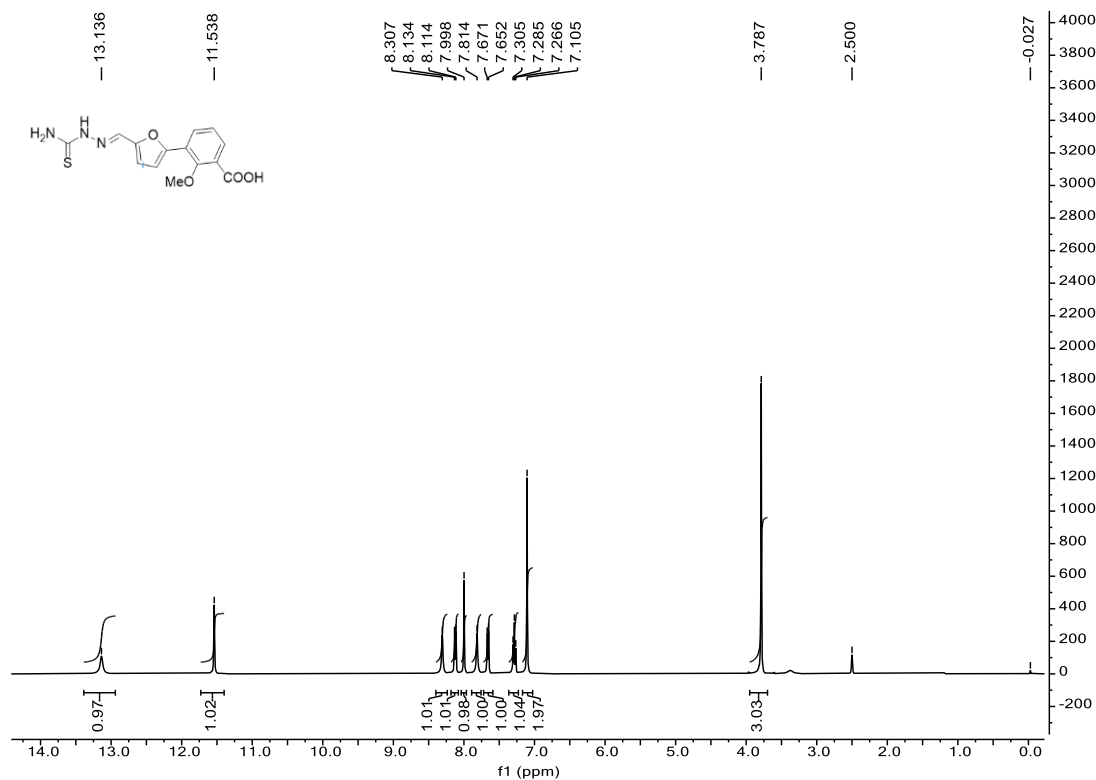

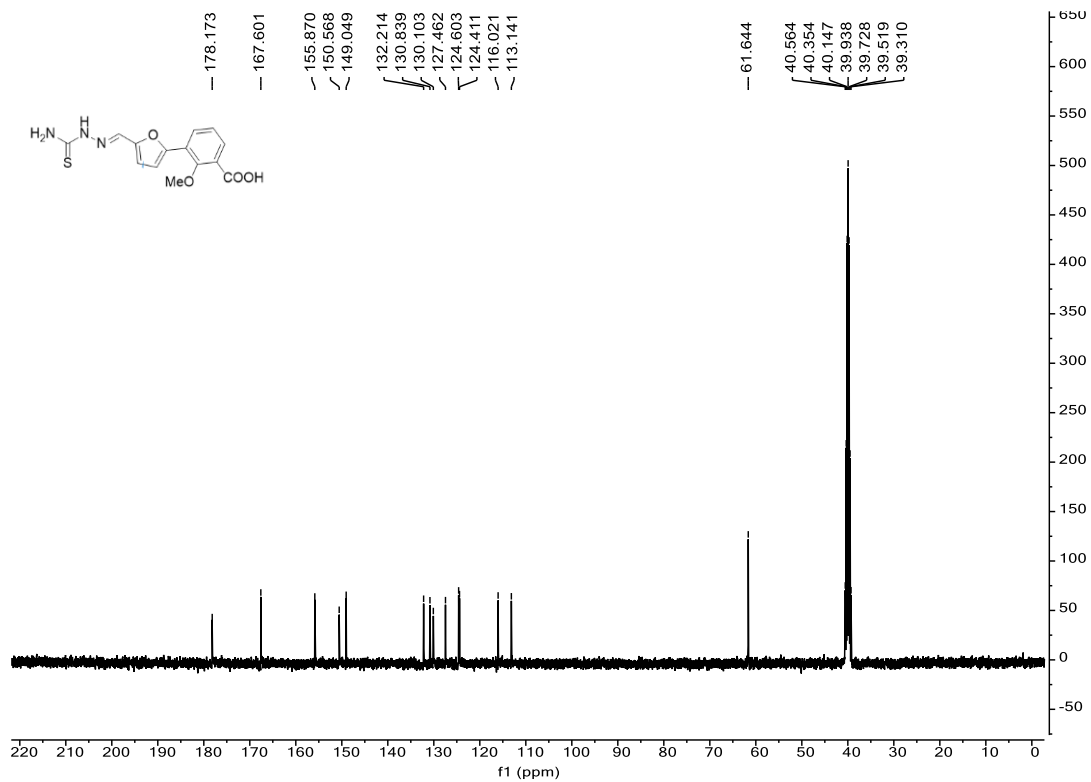

<sup>13</sup>C NMR of compound **F8-B11** (100 MHz, DMSO-*d*<sub>6</sub>)

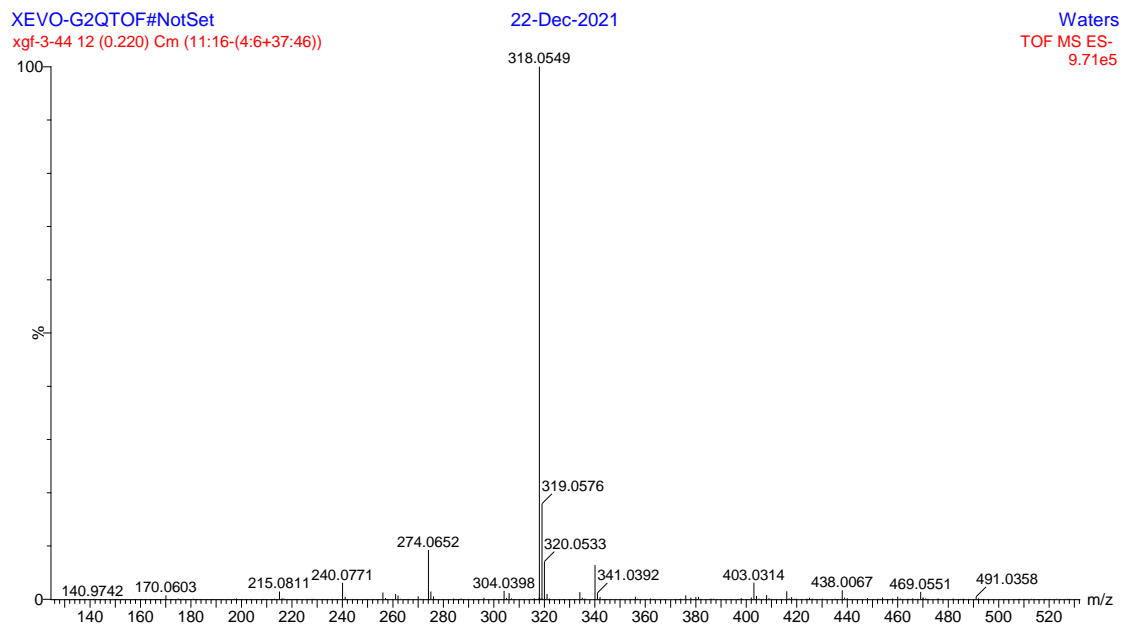

HRMS of compound **F8-B11** (ESI)

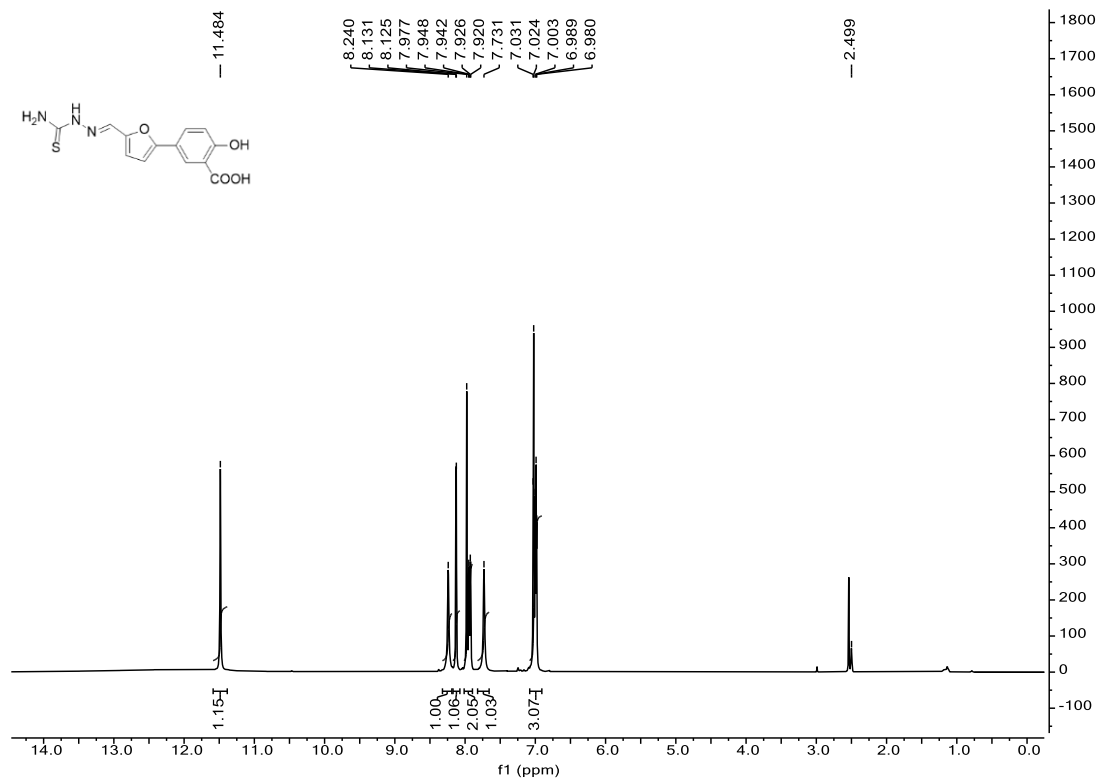

<sup>1</sup>H NMR of compound **F8-B12** (400 MHz, DMSO-*d*<sub>6</sub>)

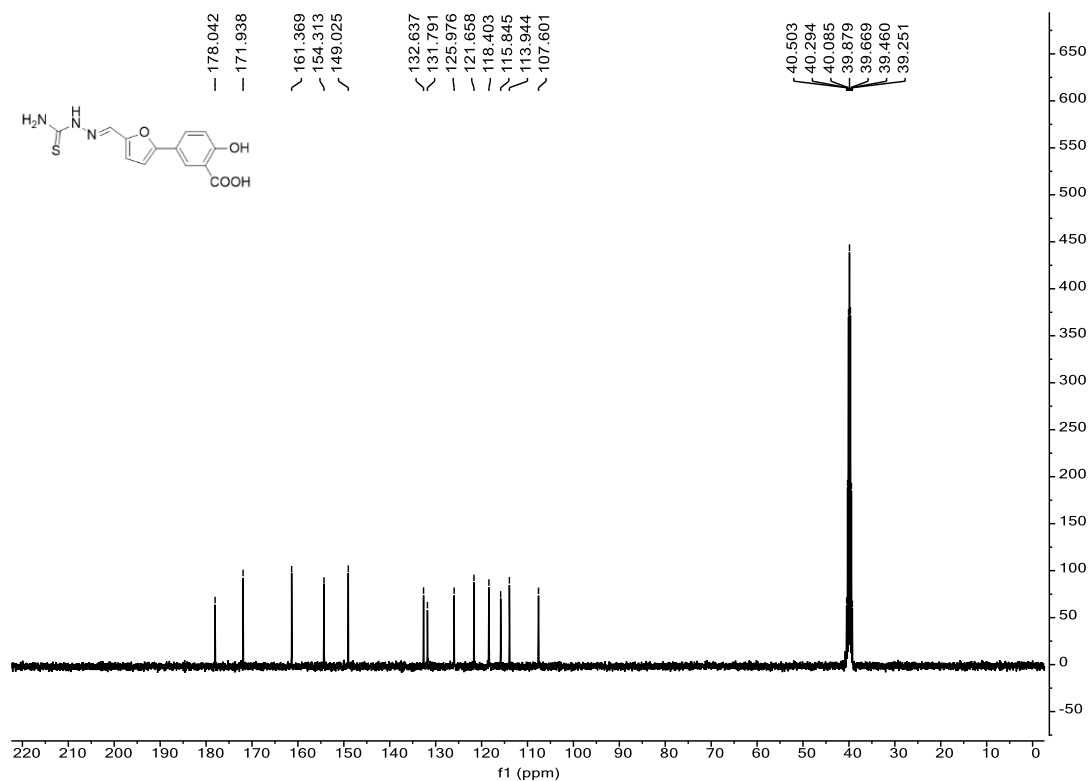

<sup>13</sup>C NMR of compound **F8-B12** (100 MHz, DMSO-*d*<sub>6</sub>)

NEGXEVO-G2QTOF#NotSet  
xgf-3-37 12 (0.220) Cm (11:16-(3:8+30:41))

29-Dec-2021

Waters  
TOF MS ES-  
2.23e6

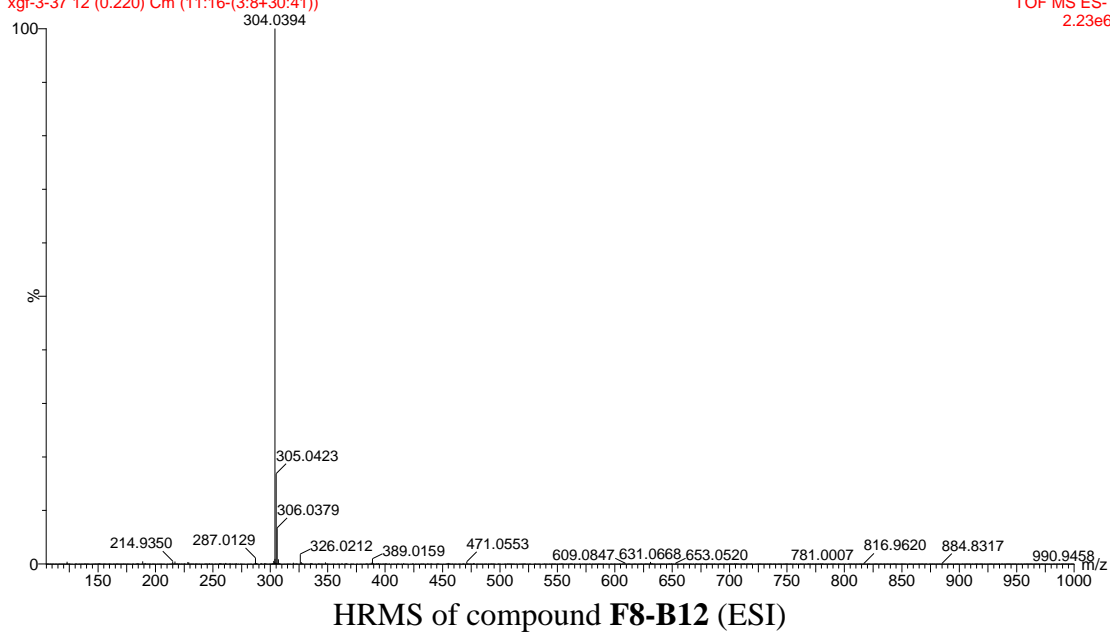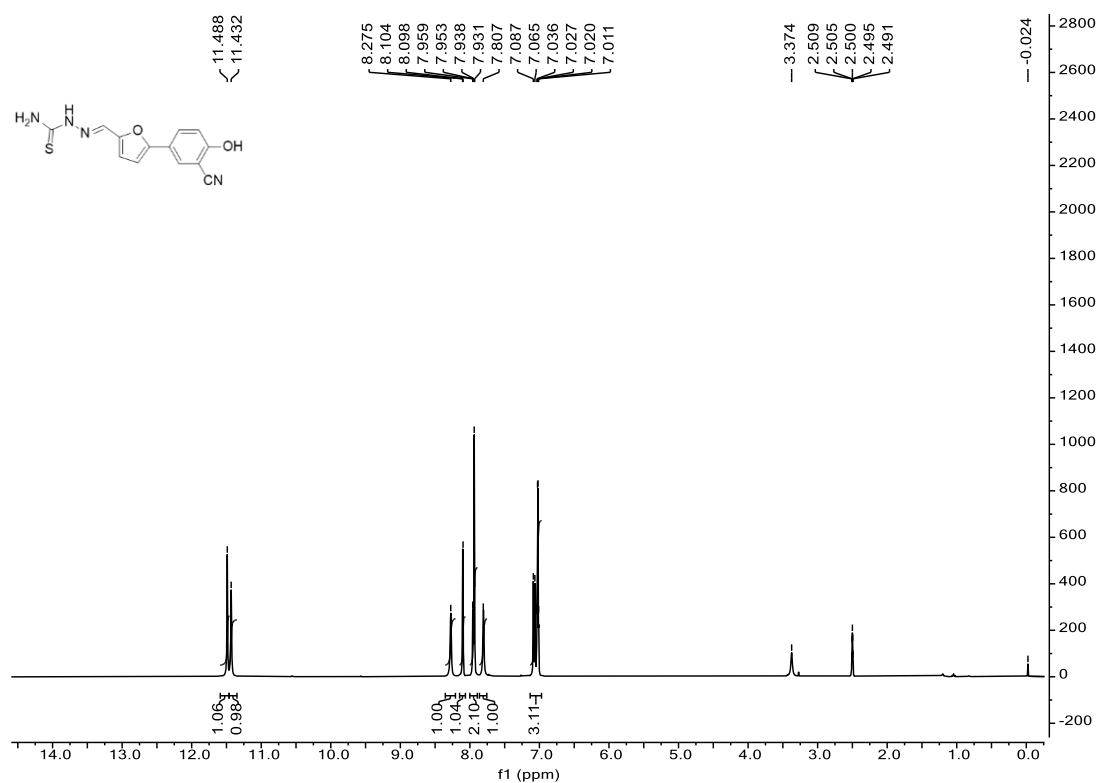

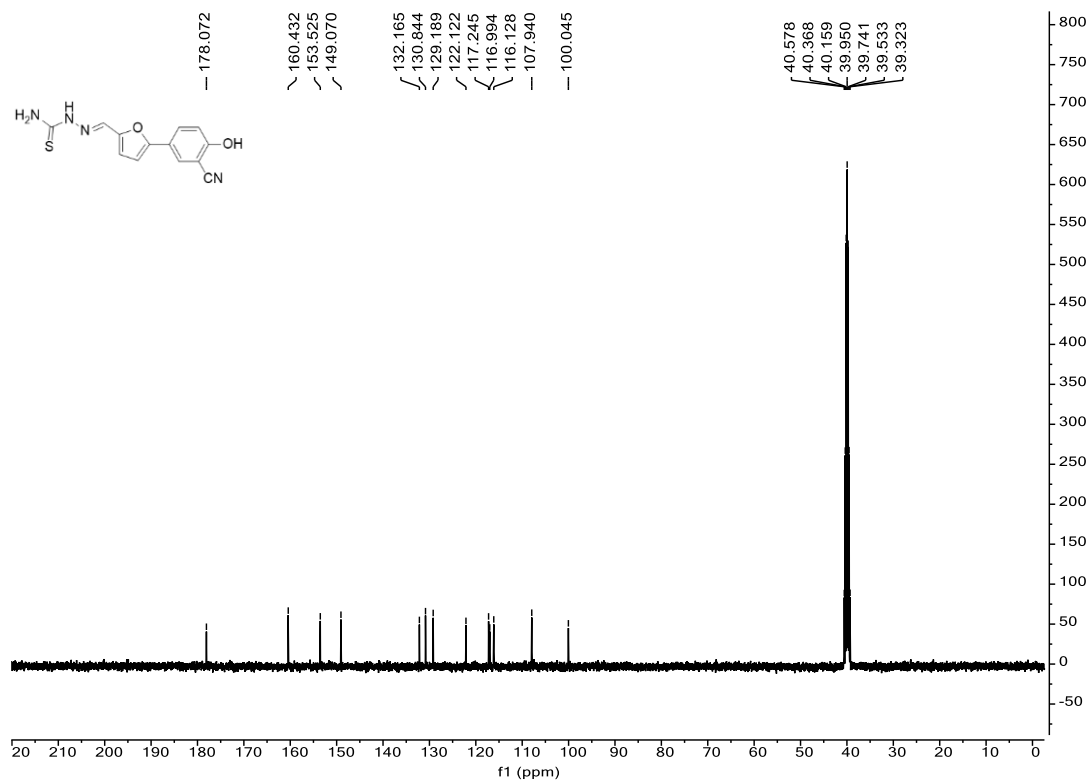

<sup>13</sup>C NMR of compound **F8-B13** (100 MHz, DMSO-*d*<sub>6</sub>)

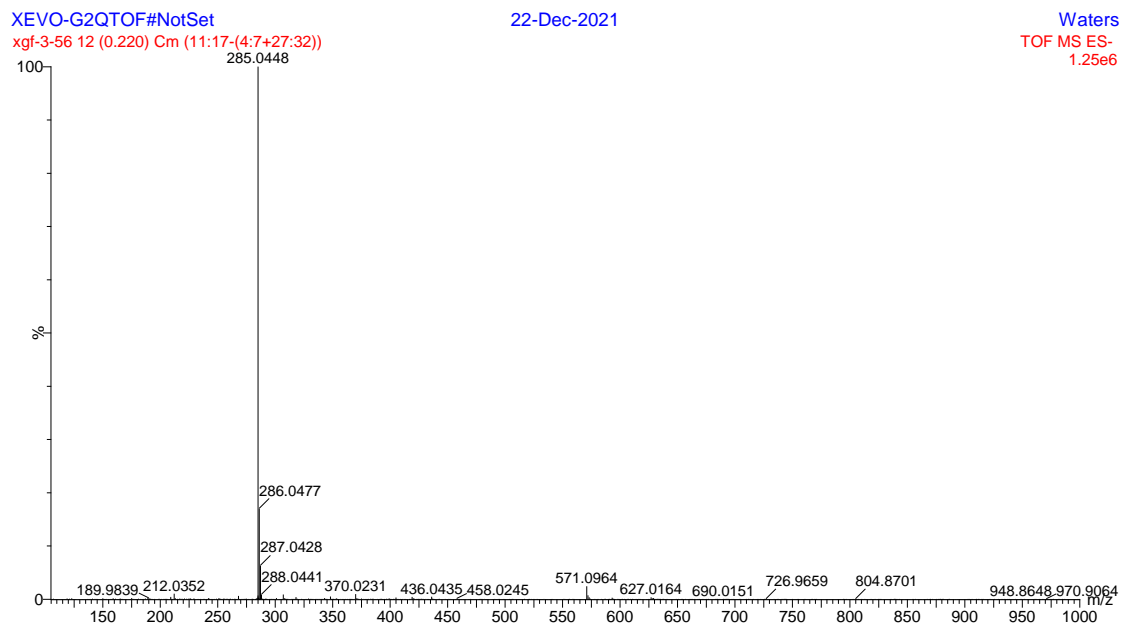

HRMS of compound **F8-B13** (ESI)

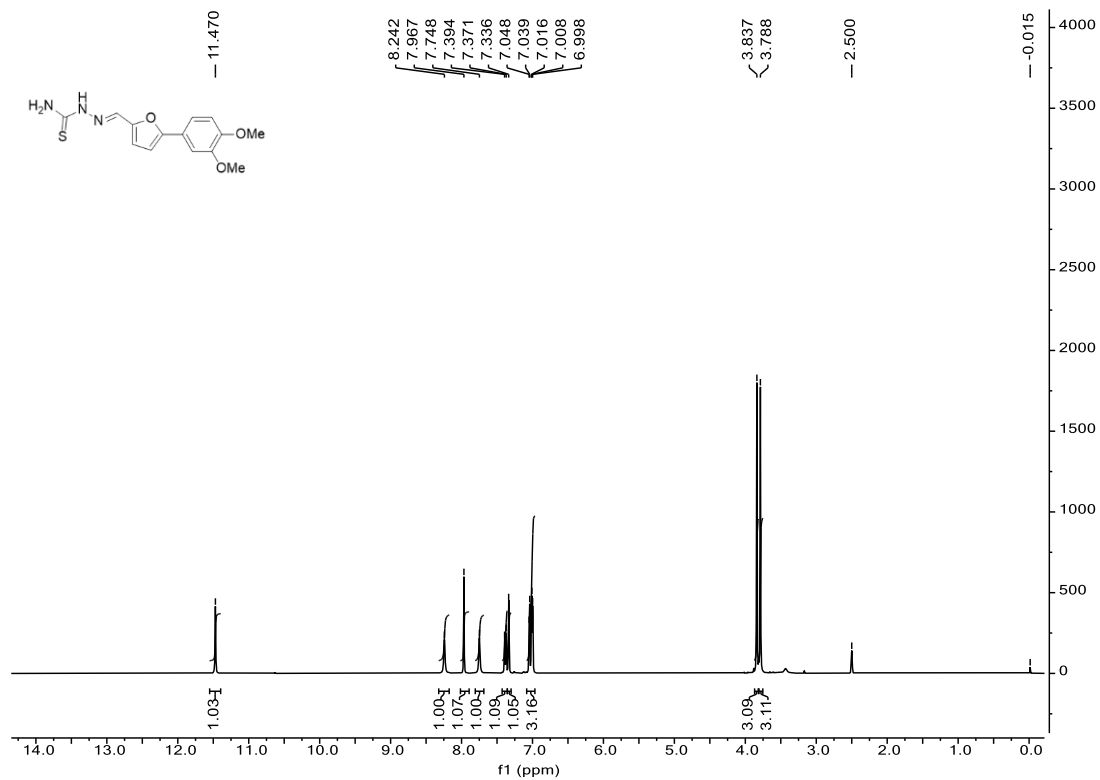

<sup>1</sup>H NMR of compound **F8-B14** (400 MHz, DMSO-*d*<sub>6</sub>)

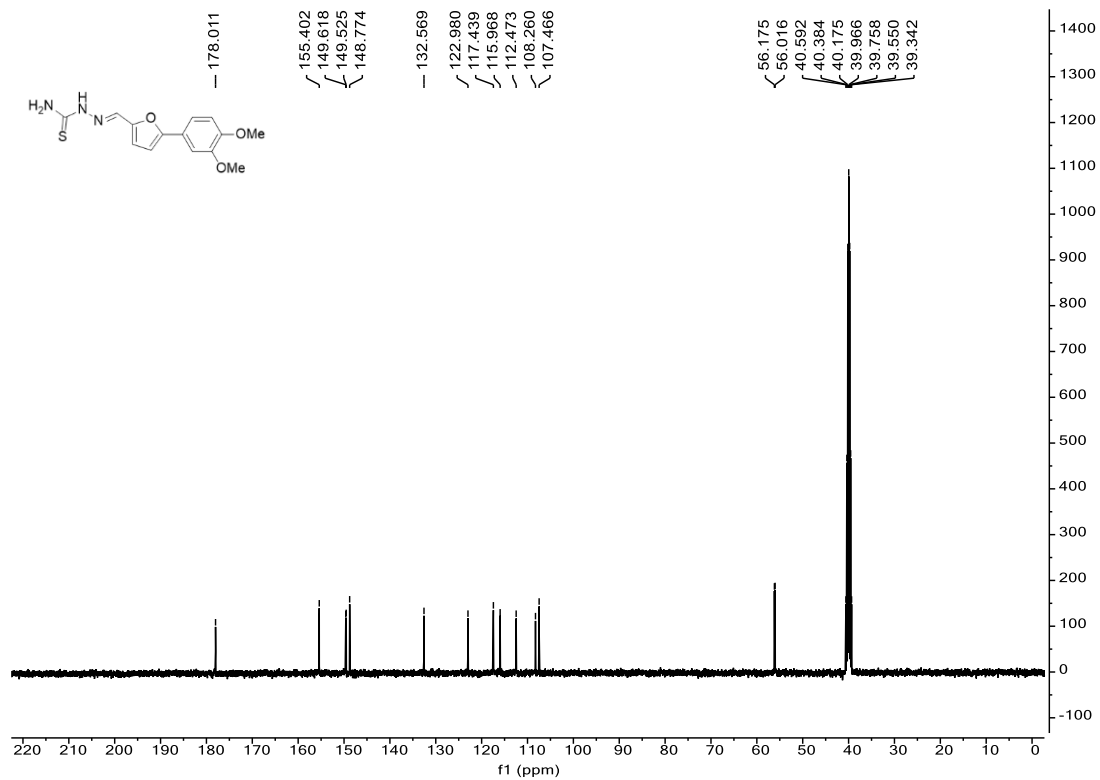

<sup>13</sup>C NMR of compound **F8-B14** ((100 MHz, DMSO-*d*<sub>6</sub>)

XEVO-G2TOF#NotSet  
xgf-3-49 13 (0.237) Cm (10:16-(4:8+33:54))

22-Dec-2021

Waters  
TOF MS ES+  
7.06e5

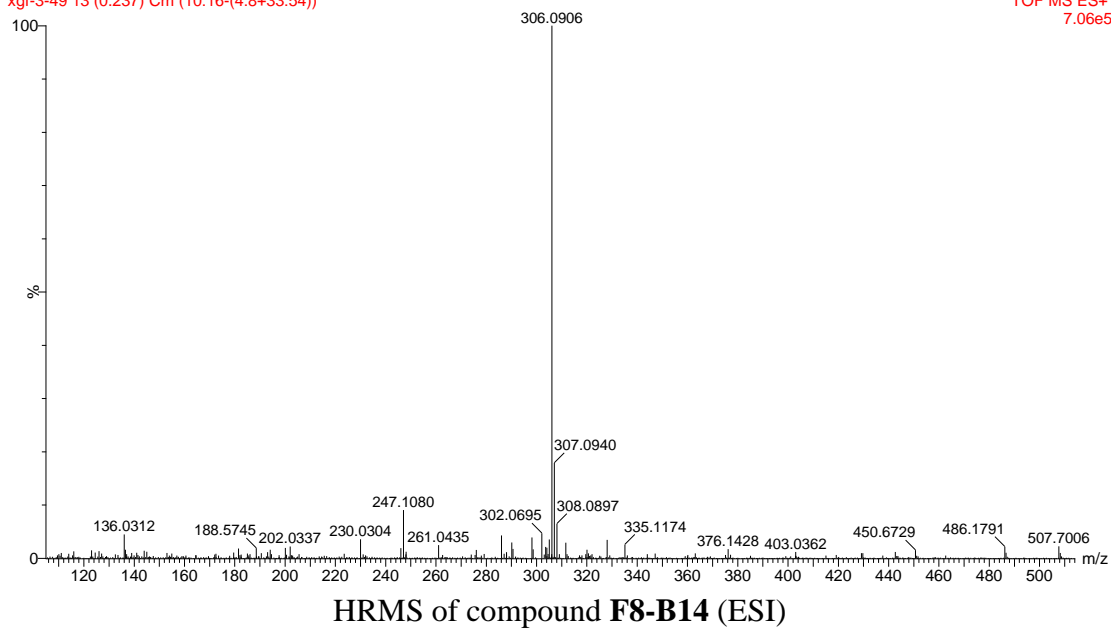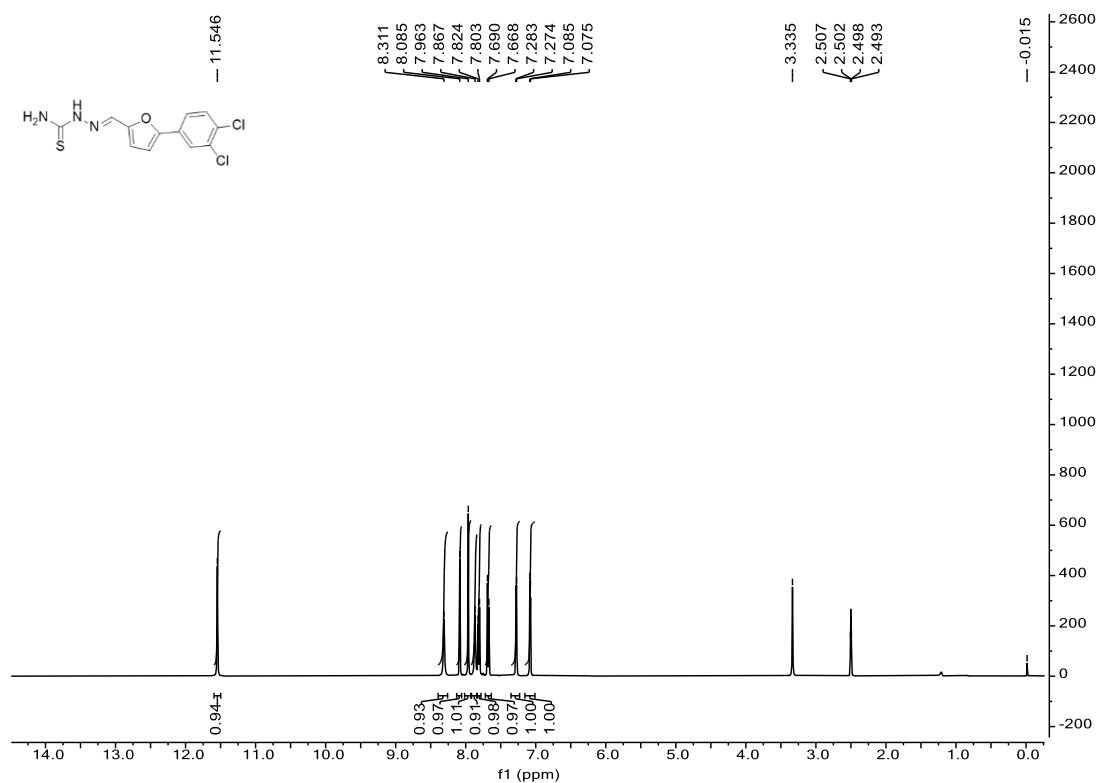

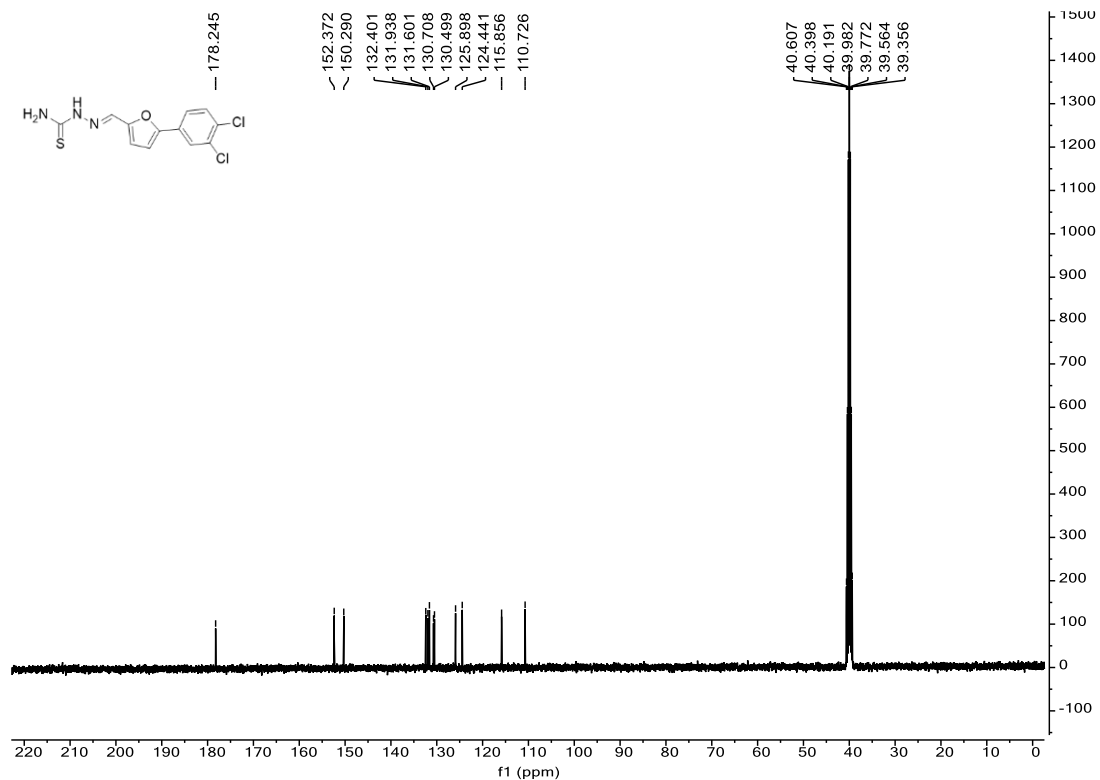

<sup>13</sup>C NMR of compound **F8-B15** (100 MHz, DMSO-*d*<sub>6</sub>)

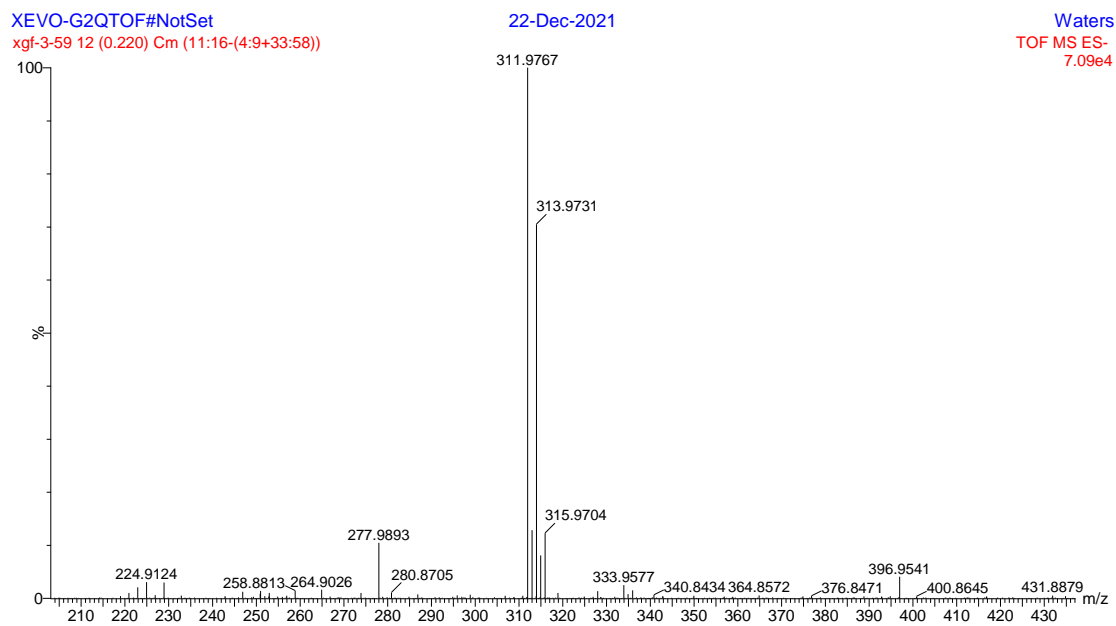

HRMS of compound **F8-B15** (ESI)



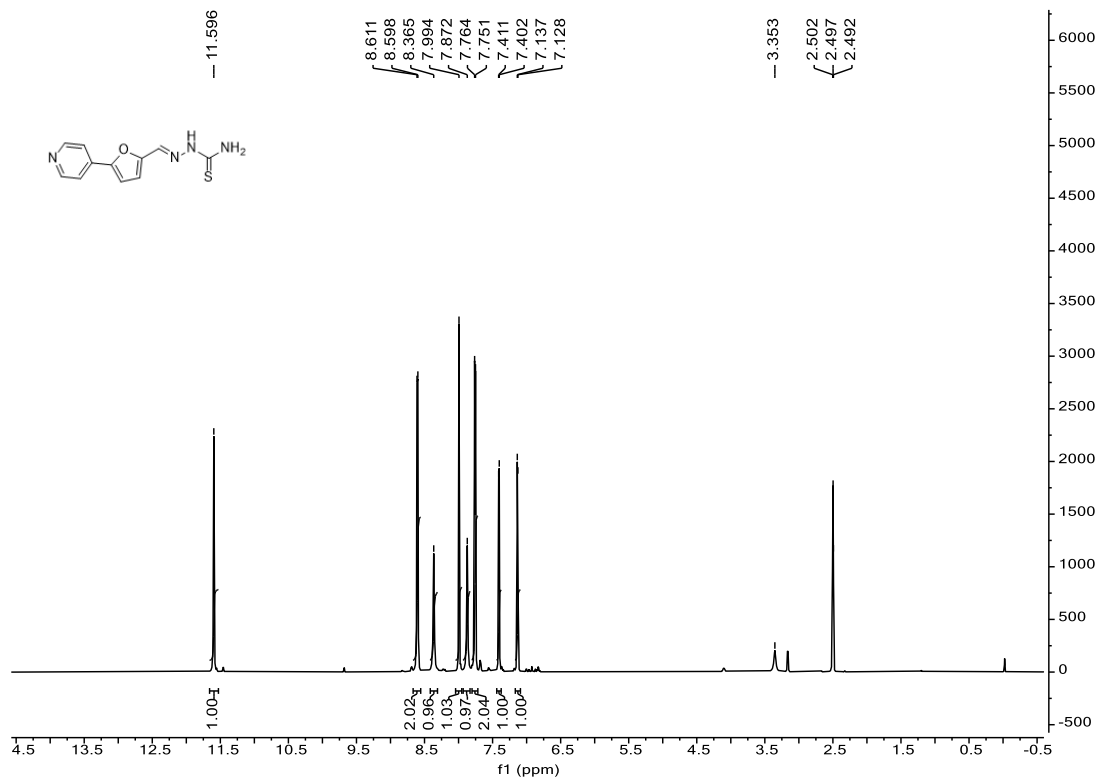

<sup>1</sup>H NMR of compound **F8-B16** (400 MHz, DMSO-*d*<sub>6</sub>)

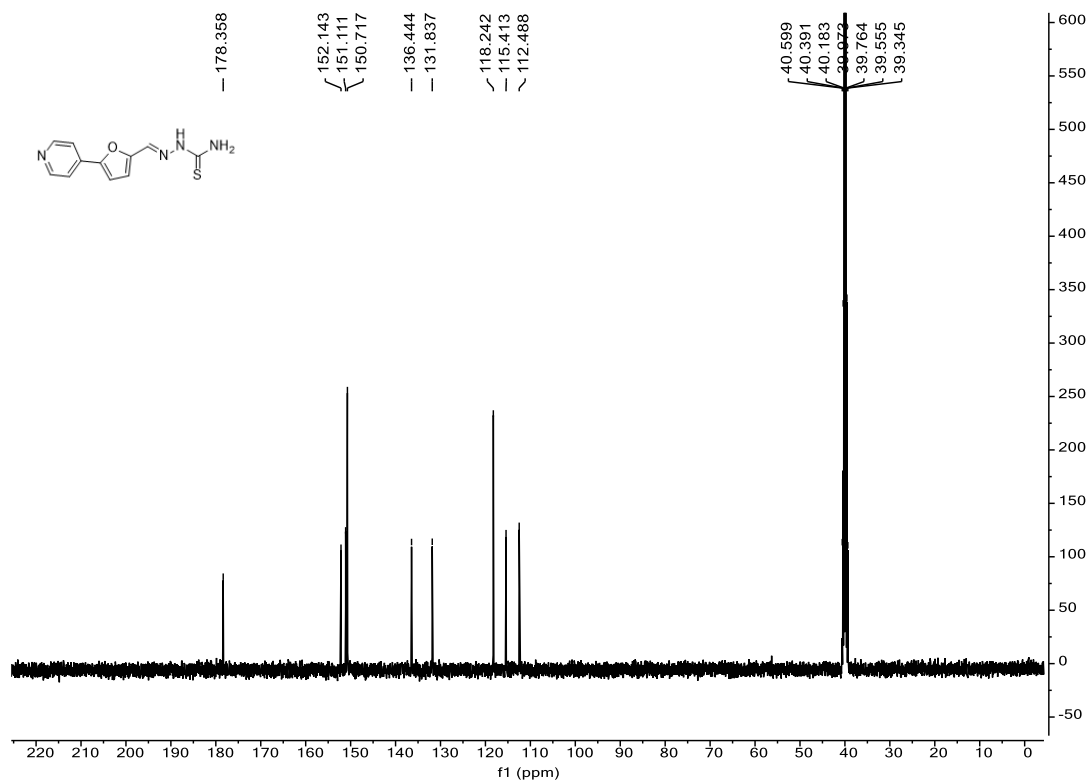

<sup>13</sup>C NMR of compound **F8-B16** (100 MHz, DMSO-*d*<sub>6</sub>)

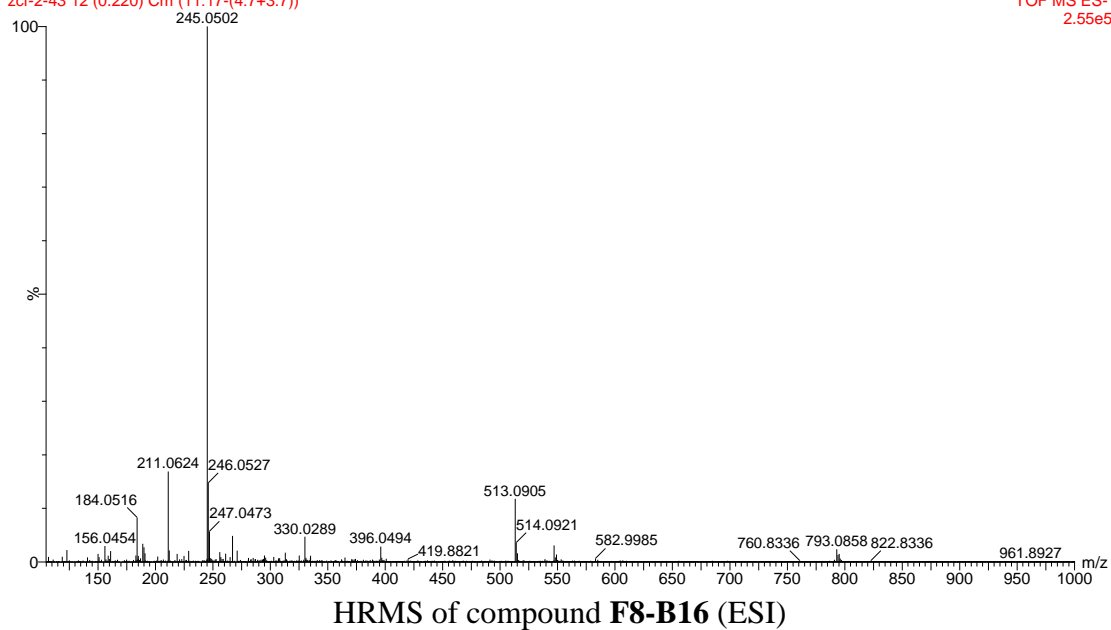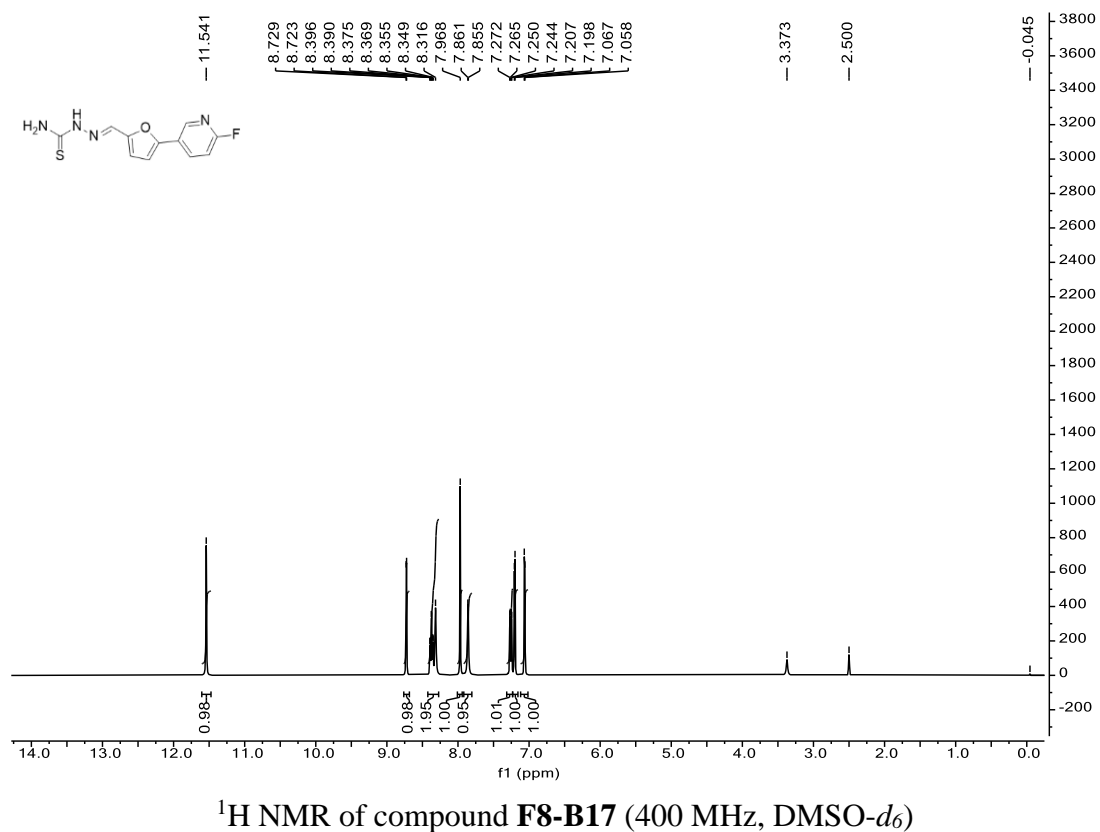

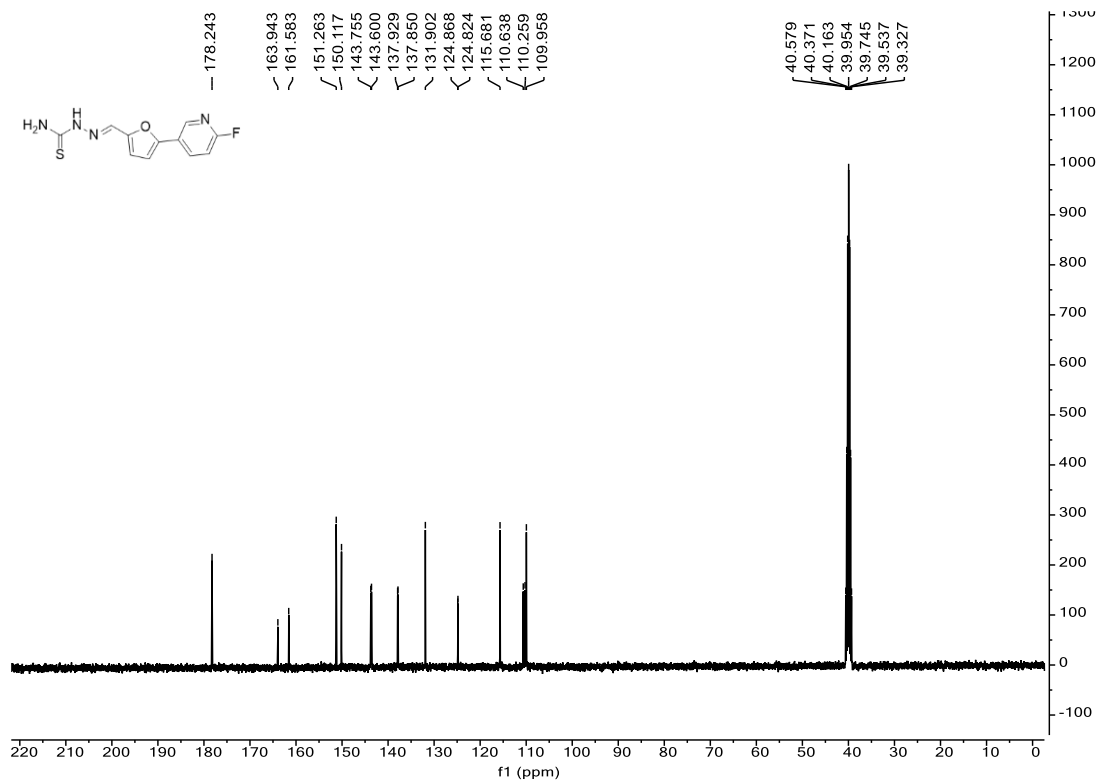

<sup>13</sup>C NMR of compound **F8-B17** ((100 MHz, DMSO-*d*<sub>6</sub>)

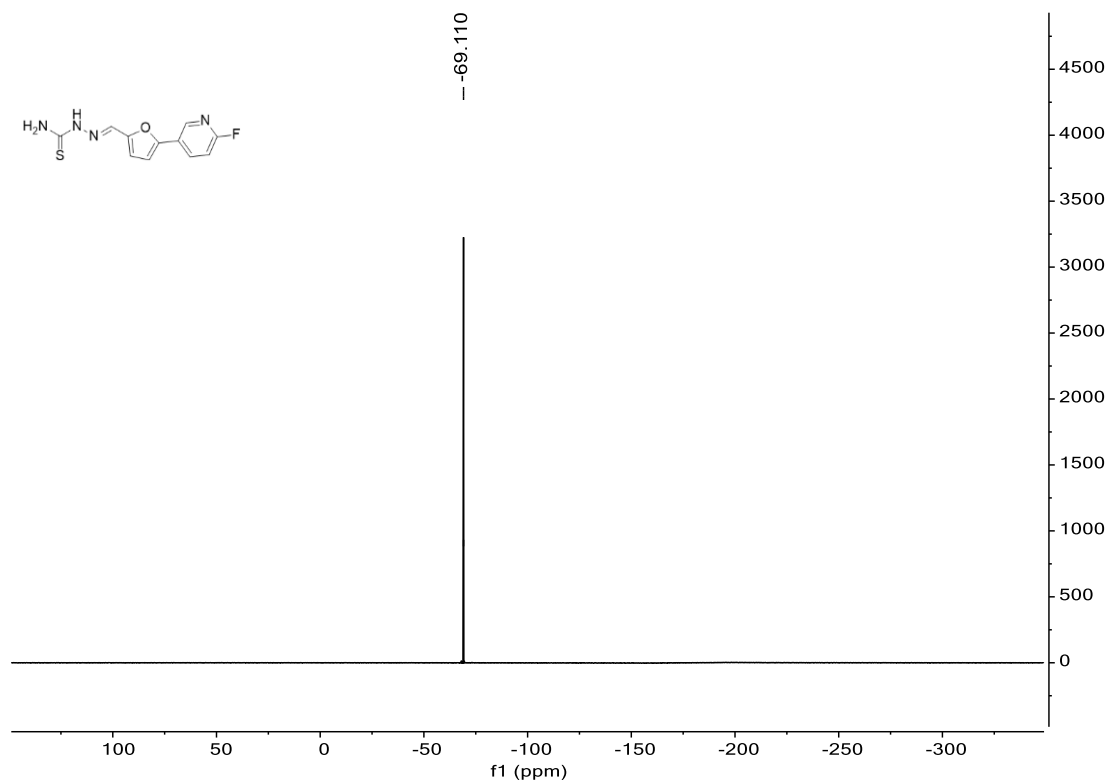

<sup>19</sup>F NMR of compound **F8-B17** (376 MHz, DMSO-*d*<sub>6</sub>)

NEGXEVO-G2QTOF#NotSet  
zcf-1-19 12 (0.220) Cm (11:14-(3:8+31:38))

23-Dec-2021

Waters  
TOF MS ES-  
5.33e5

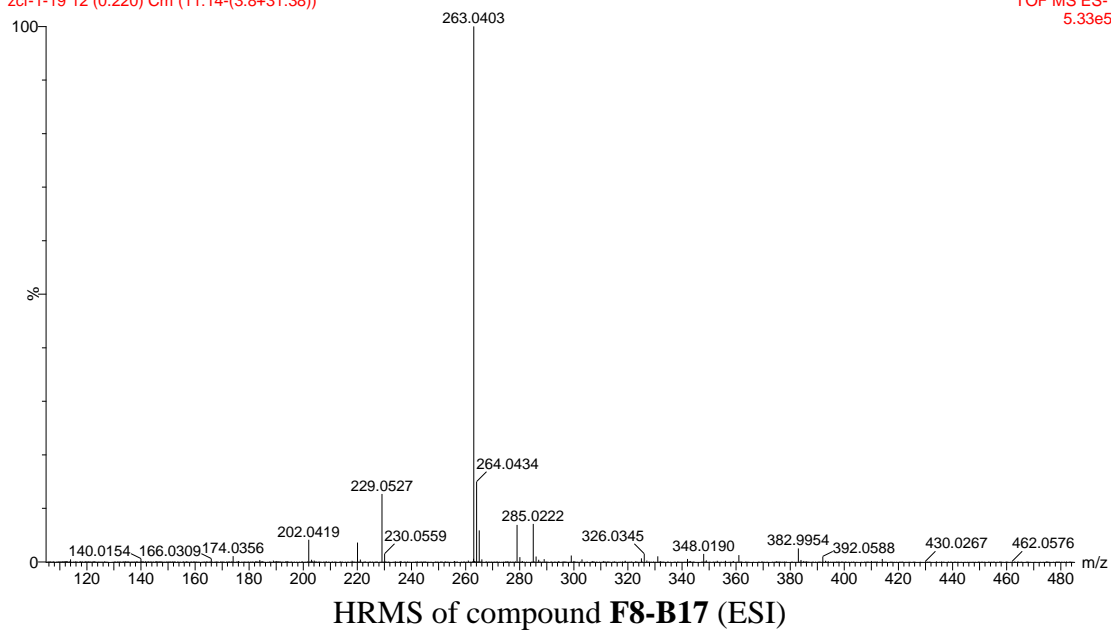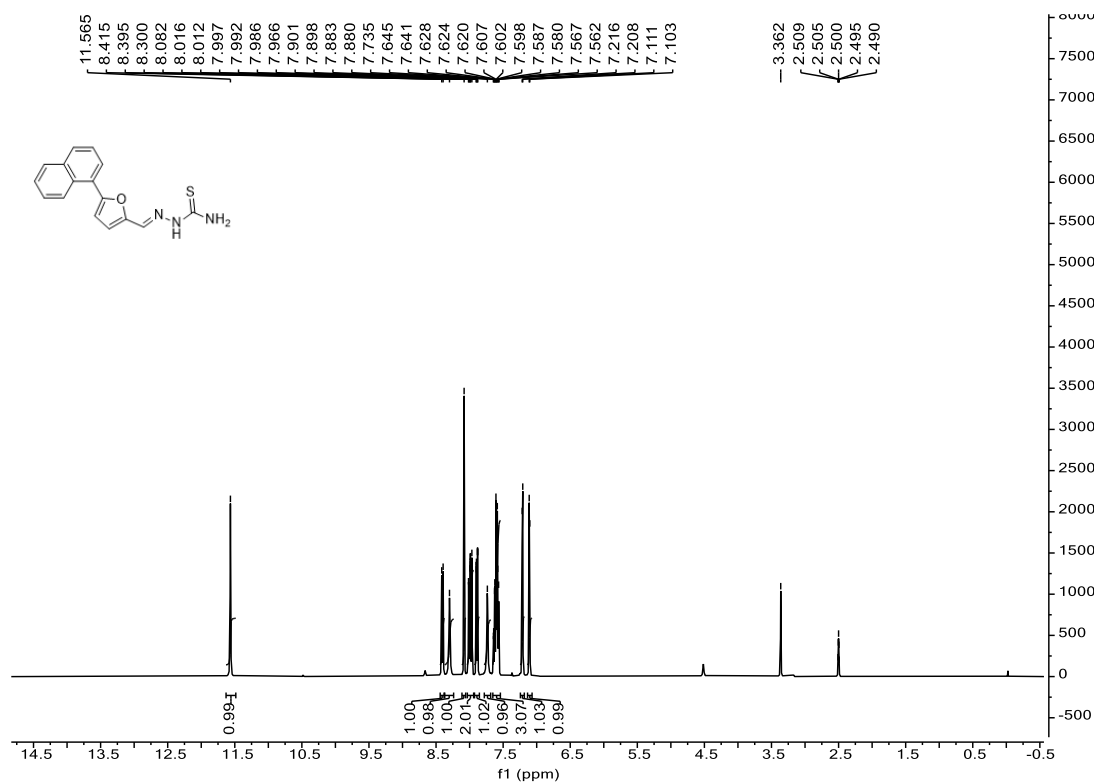

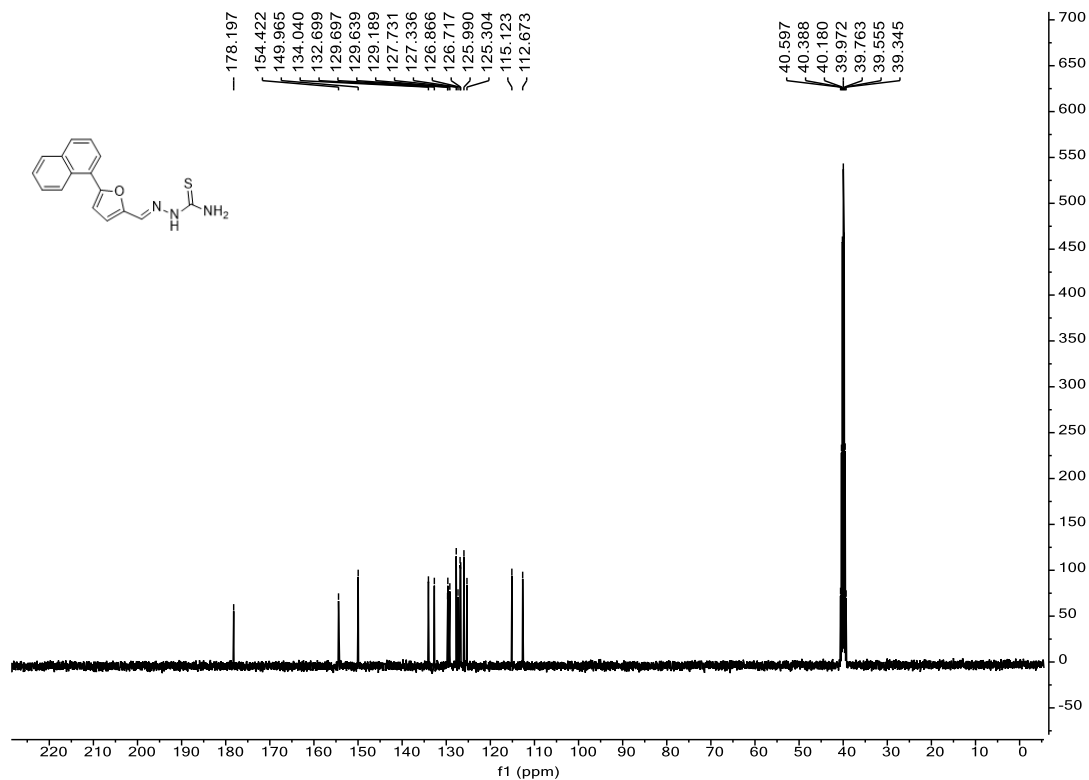

$^{13}\text{C}$  NMR of compound **F8-B18** (100 MHz,  $\text{DMSO-}d_6$ )

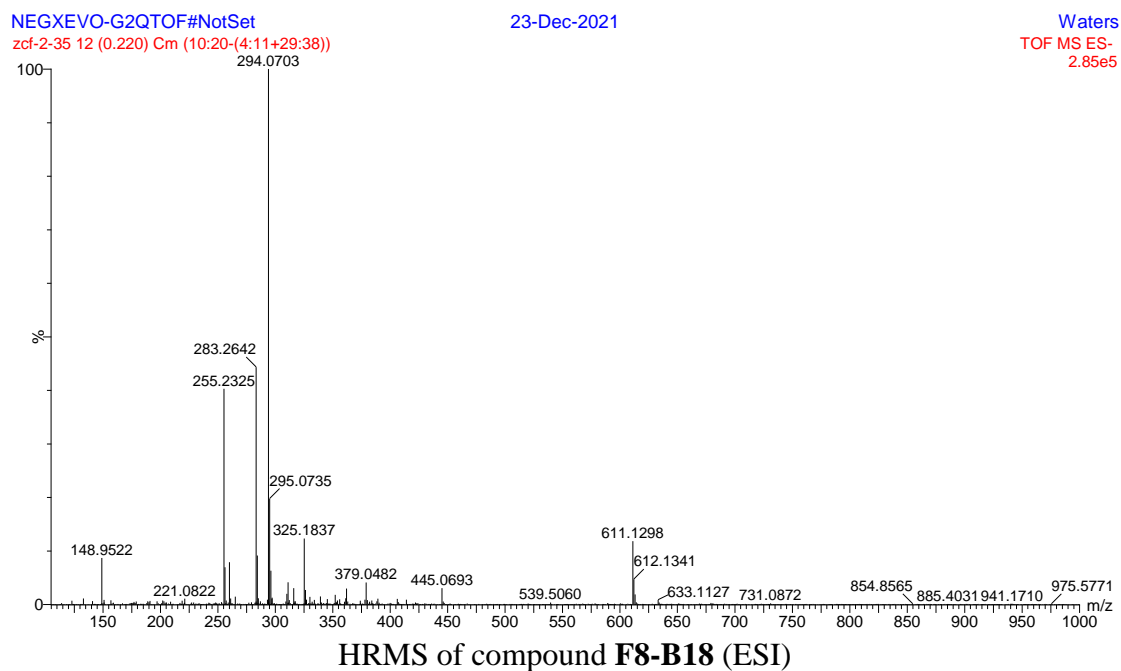

HRMS of compound **F8-B18** (ESI)

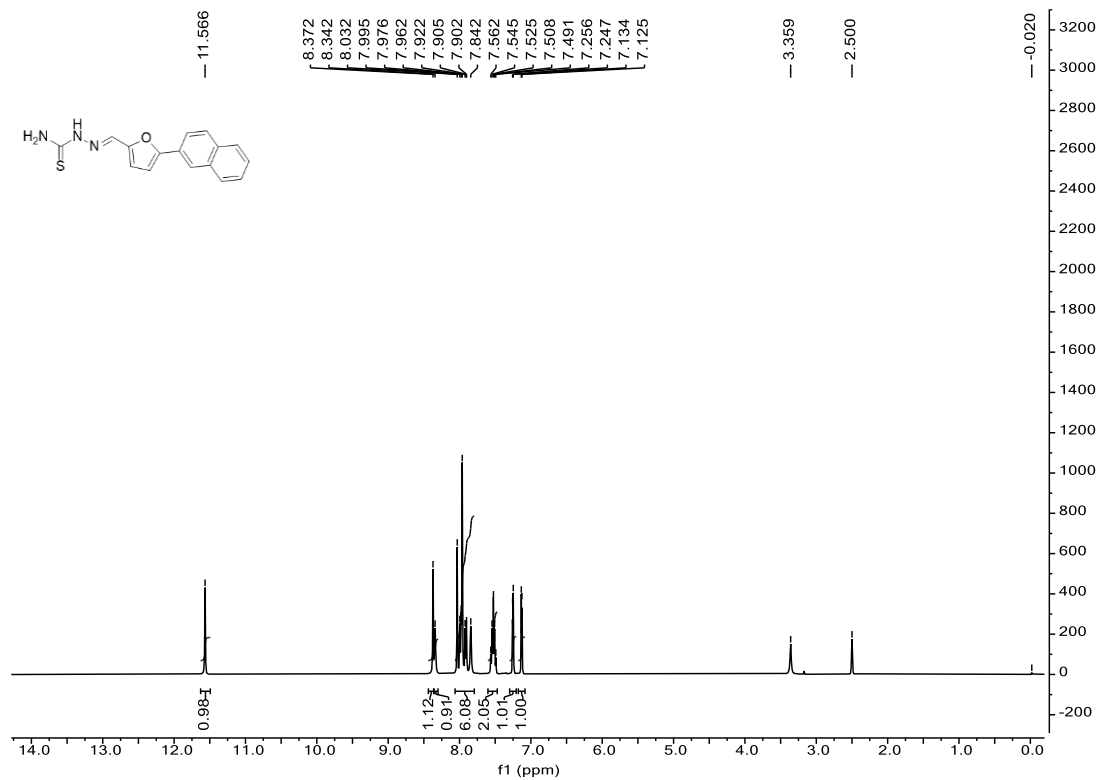

<sup>1</sup>H NMR of compound **F8-B19** (400 MHz, DMSO-*d*<sub>6</sub>)

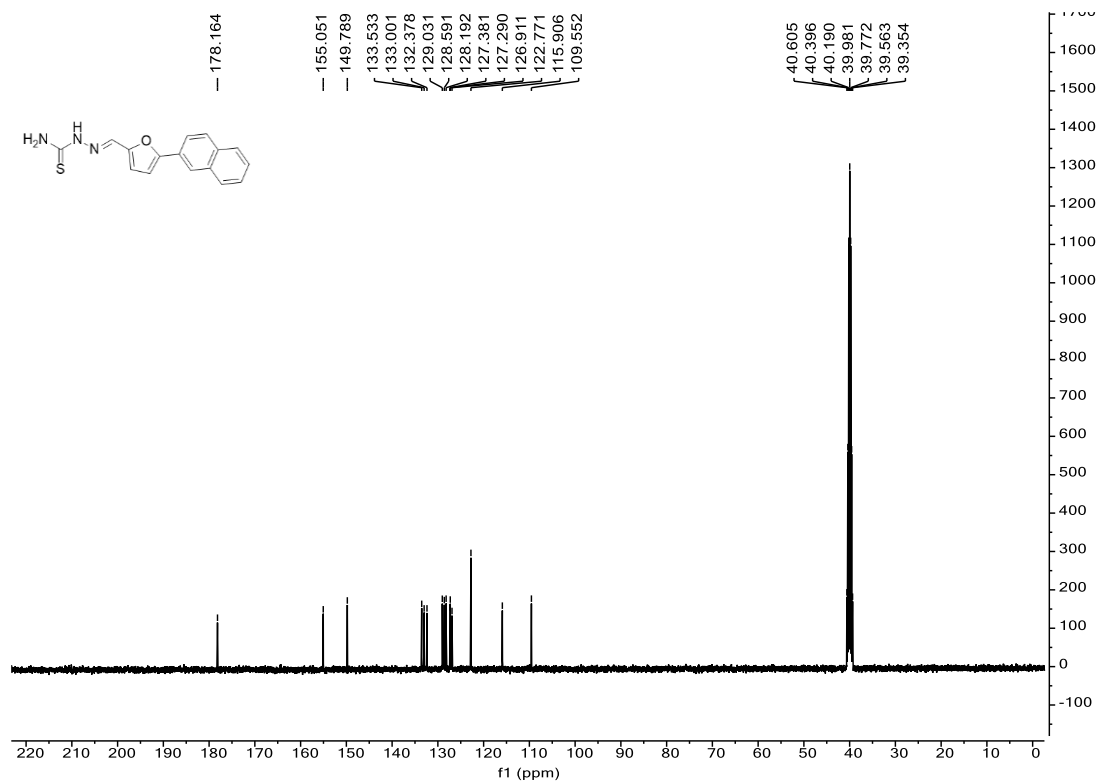

<sup>13</sup>C NMR of compound **F8-B19** ((100 MHz, DMSO-*d*<sub>6</sub>)

NEGXEVO-G2QTOF#NotSet  
xgf-1-122 11 (0.203) Cm (11:15-(4:6+34:39))

23-Dec-2021

Waters  
TOF MS ES-  
1.68e5

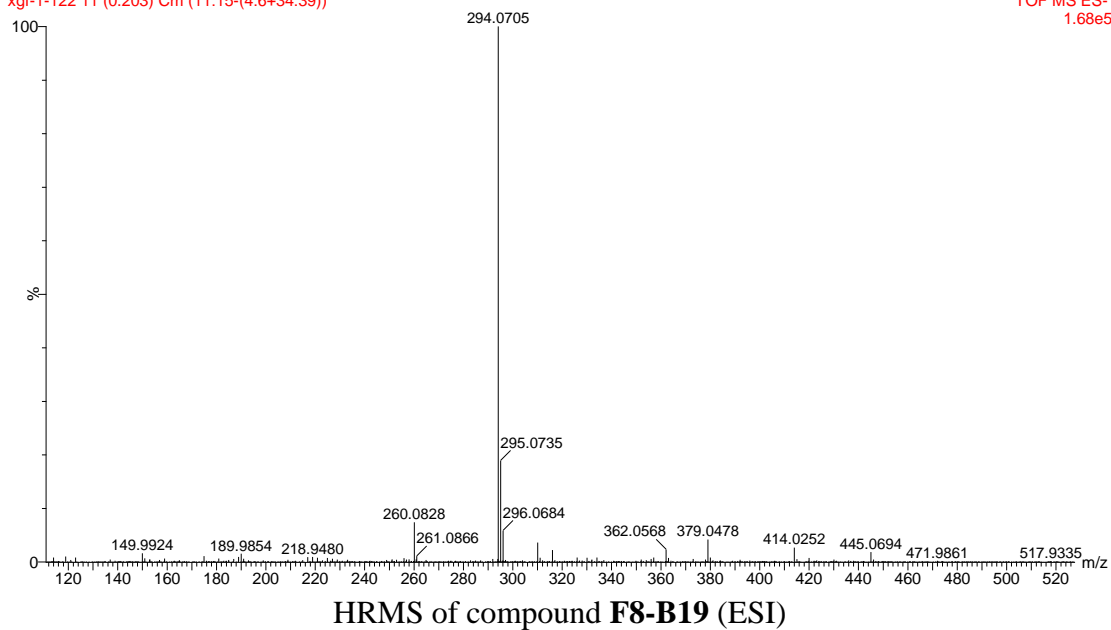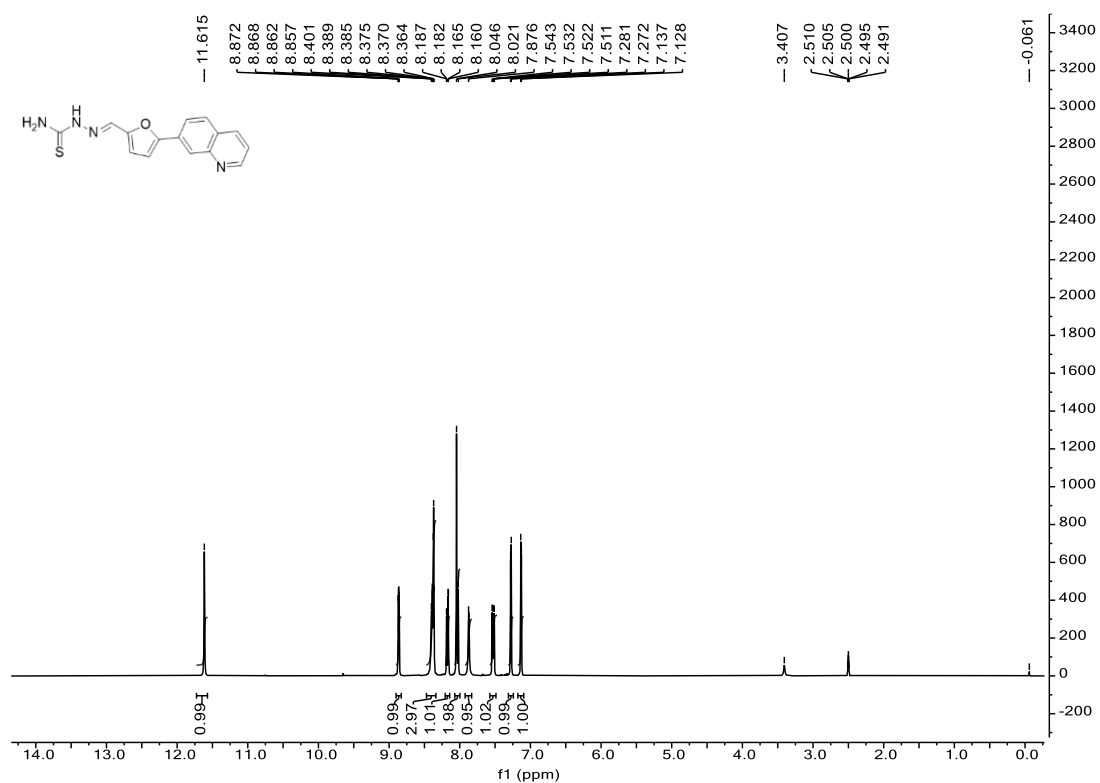

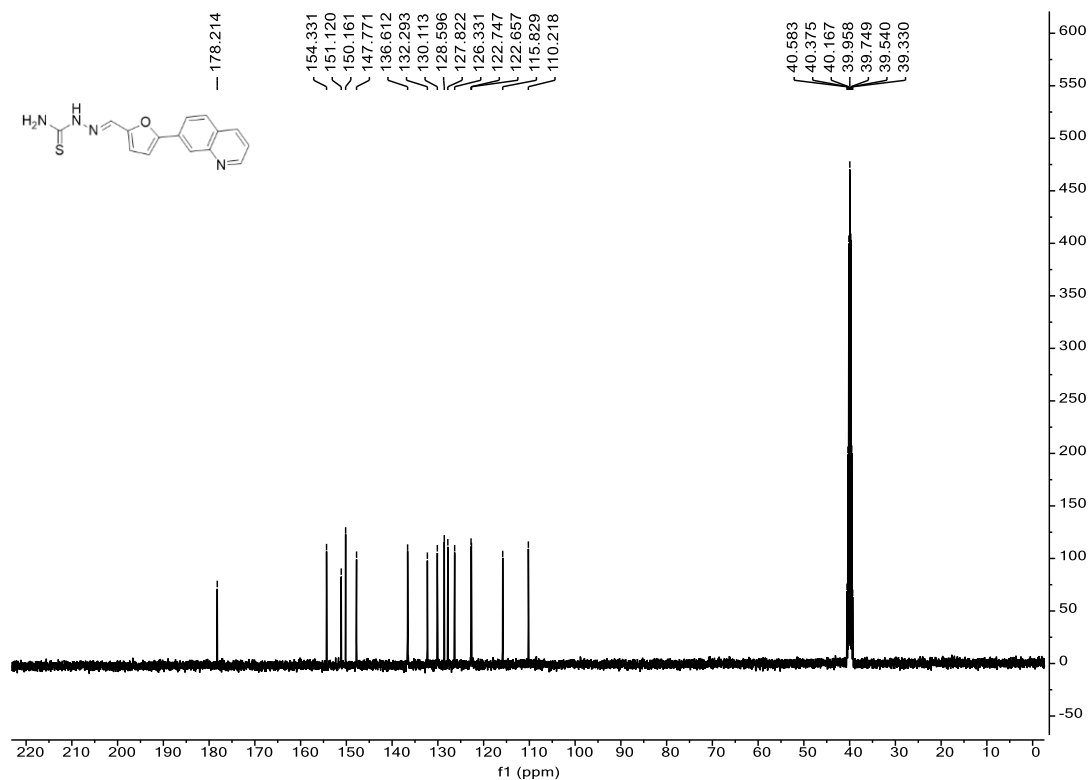

$^{13}\text{C}$  NMR of compound **F8-B20** (100 MHz,  $\text{DMSO-}d_6$ )

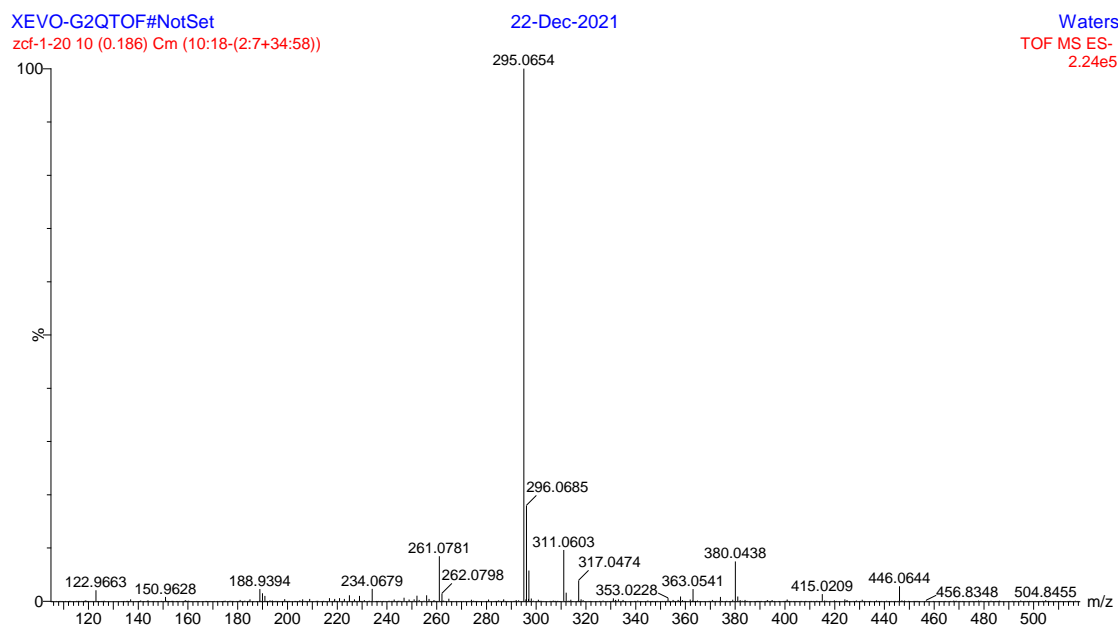



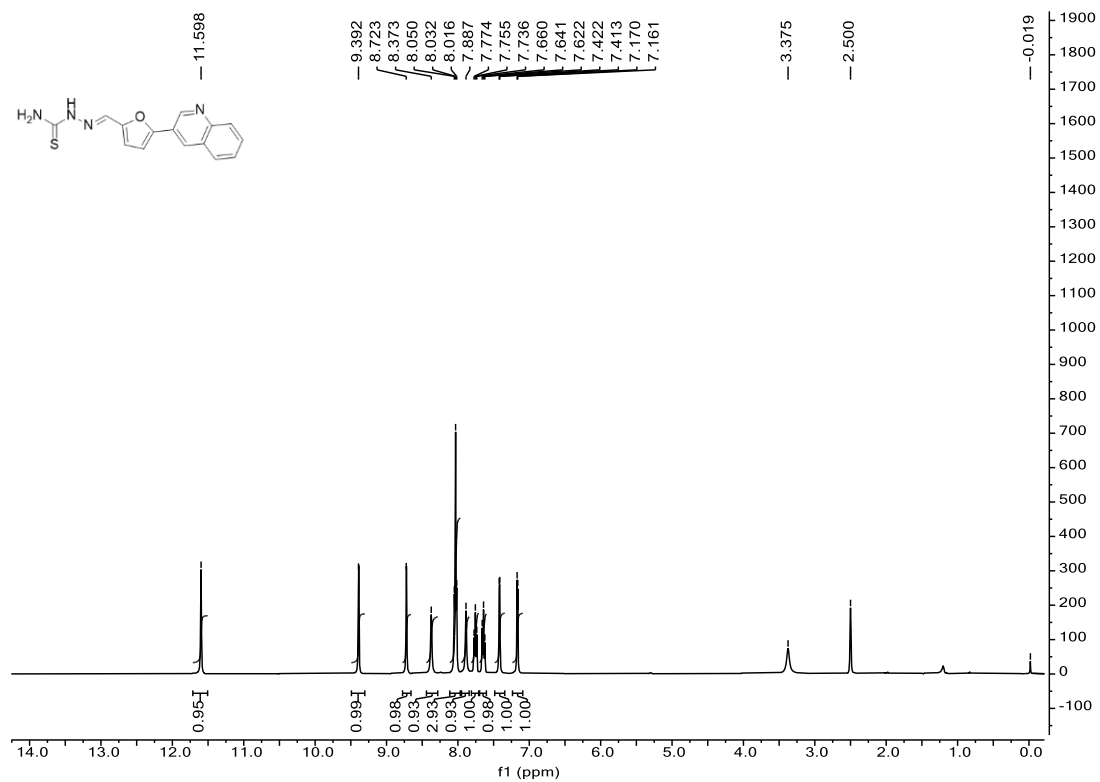

<sup>1</sup>H NMR of compound **F8-B21** (400 MHz, DMSO-*d*<sub>6</sub>)

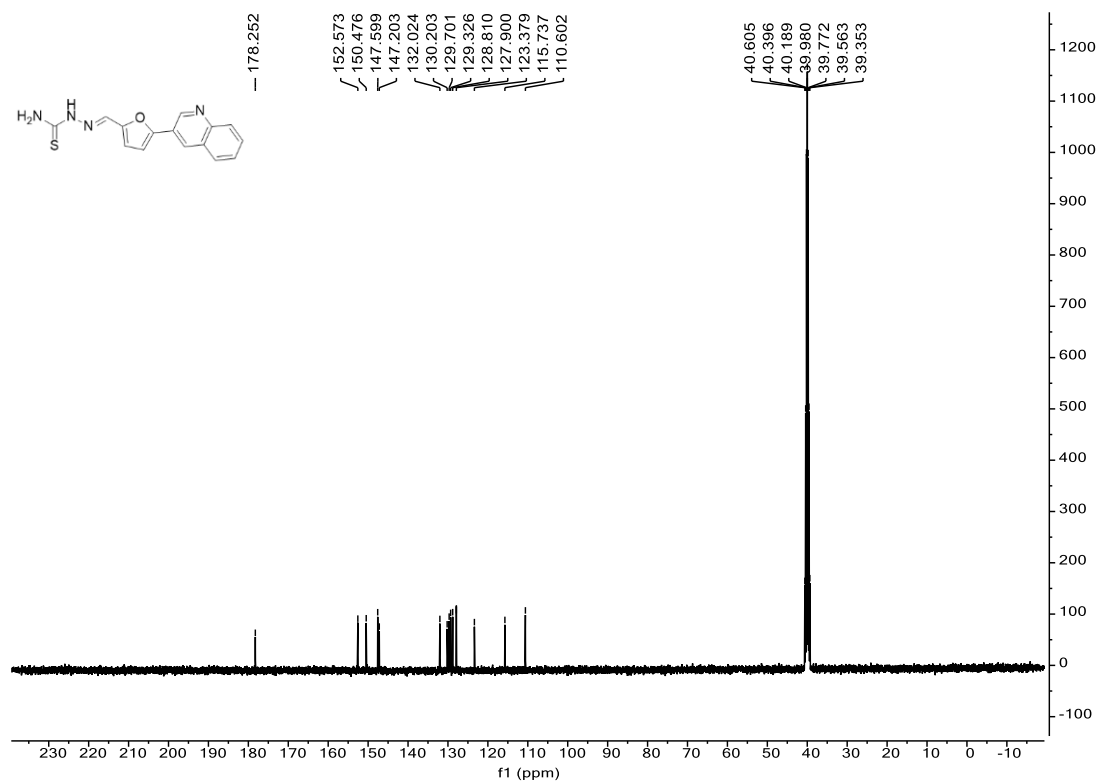

<sup>13</sup>C NMR of compound **F8-B21** ((100 MHz, DMSO-*d*<sub>6</sub>)

XEVO-G2TOF#NotSet  
zcf-1-20 10 (0.186) Cm (10:18-(2:7+34:58))

22-Dec-2021

Waters  
TOF MS ES-  
2.24e5

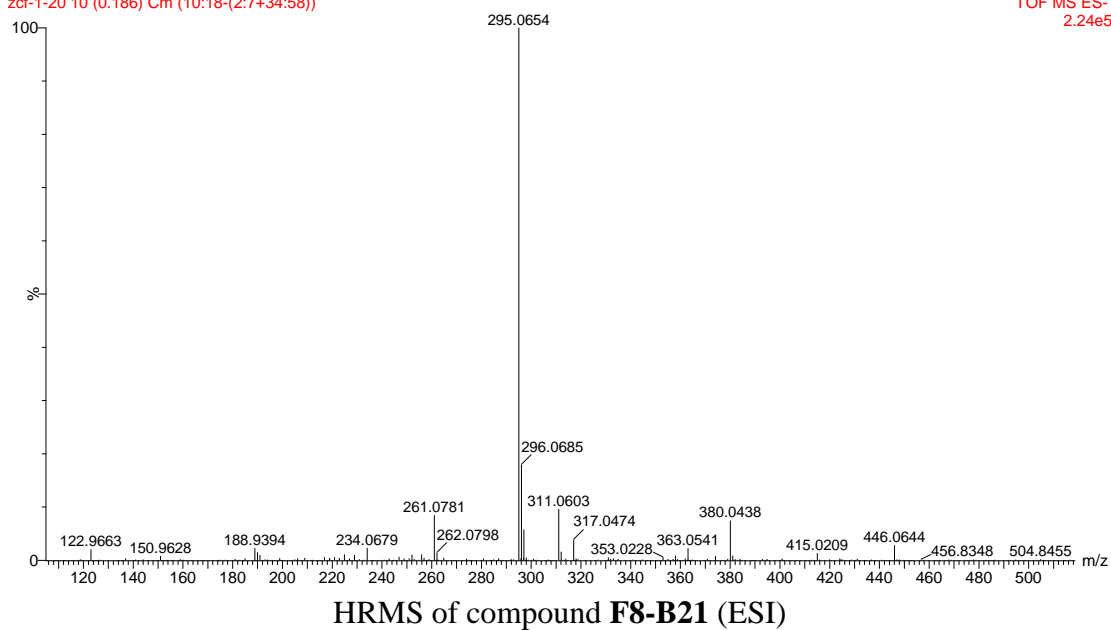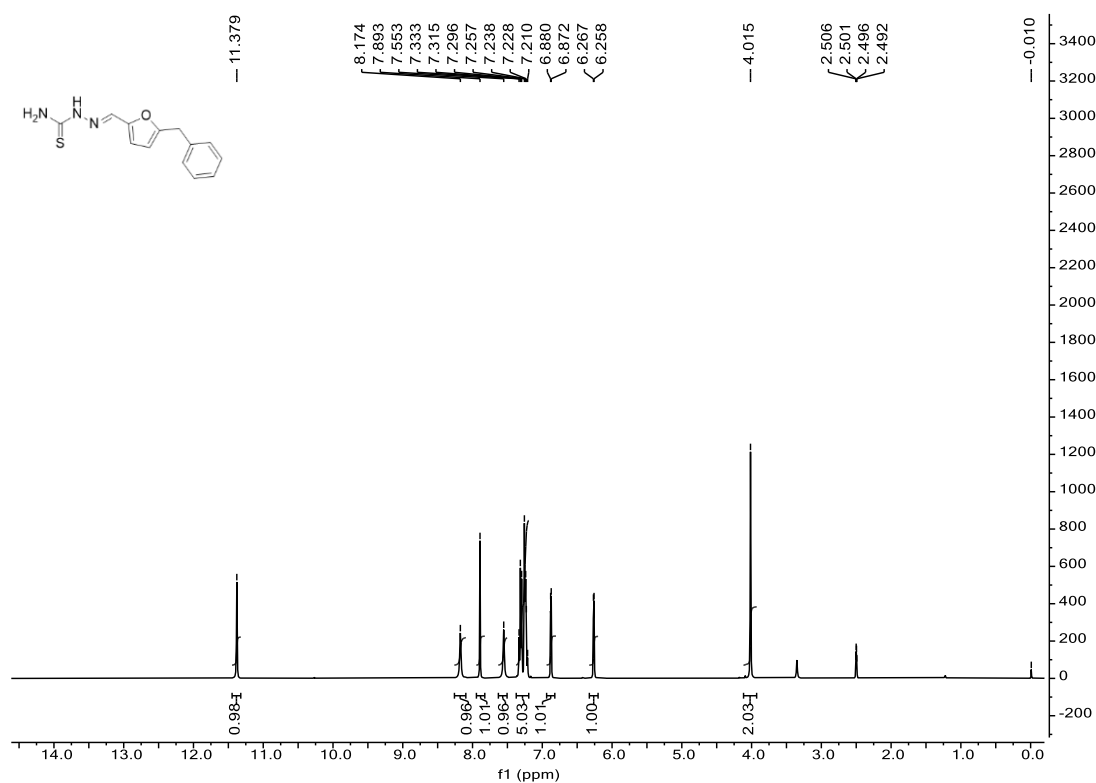

$^1\text{H}$  NMR of compound **F8-B22** (400 MHz,  $\text{DMSO-}d_6$ )

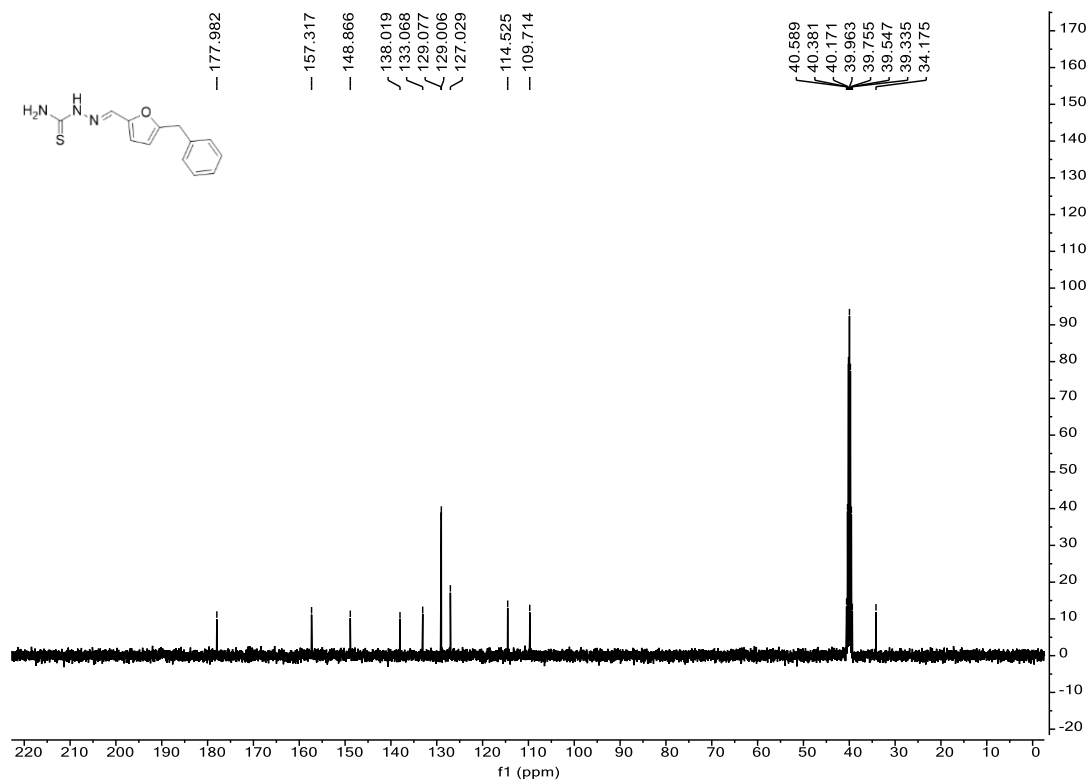

$^{13}\text{C}$  NMR of compound **F8-B22** (100 MHz,  $\text{DMSO-}d_6$ )

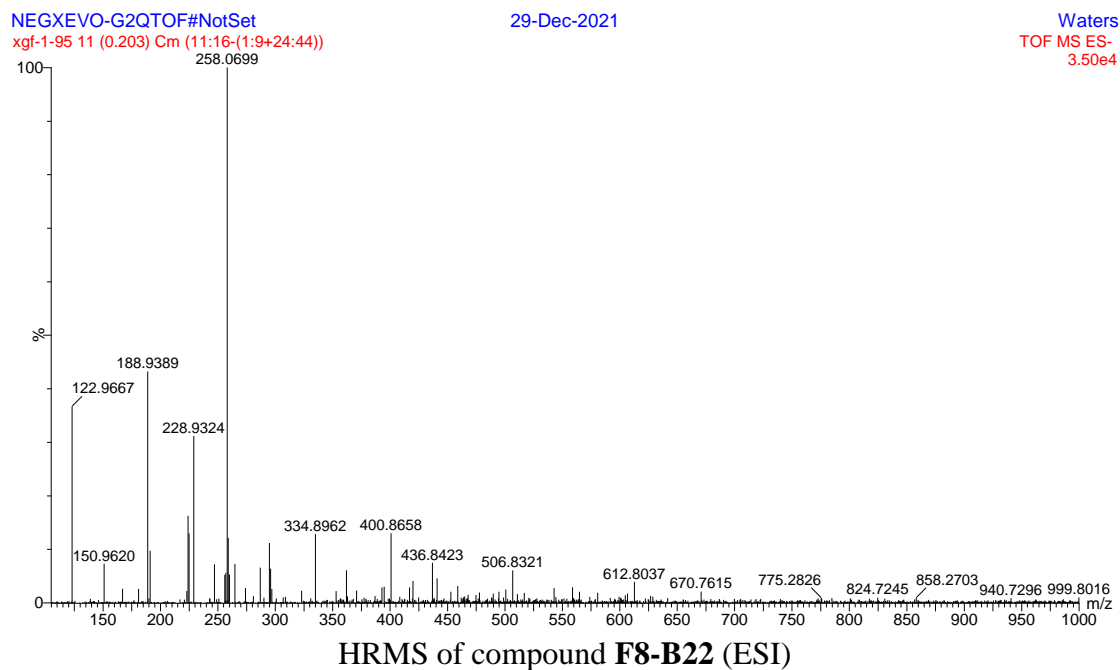

HRMS of compound **F8-B22** (ESI)

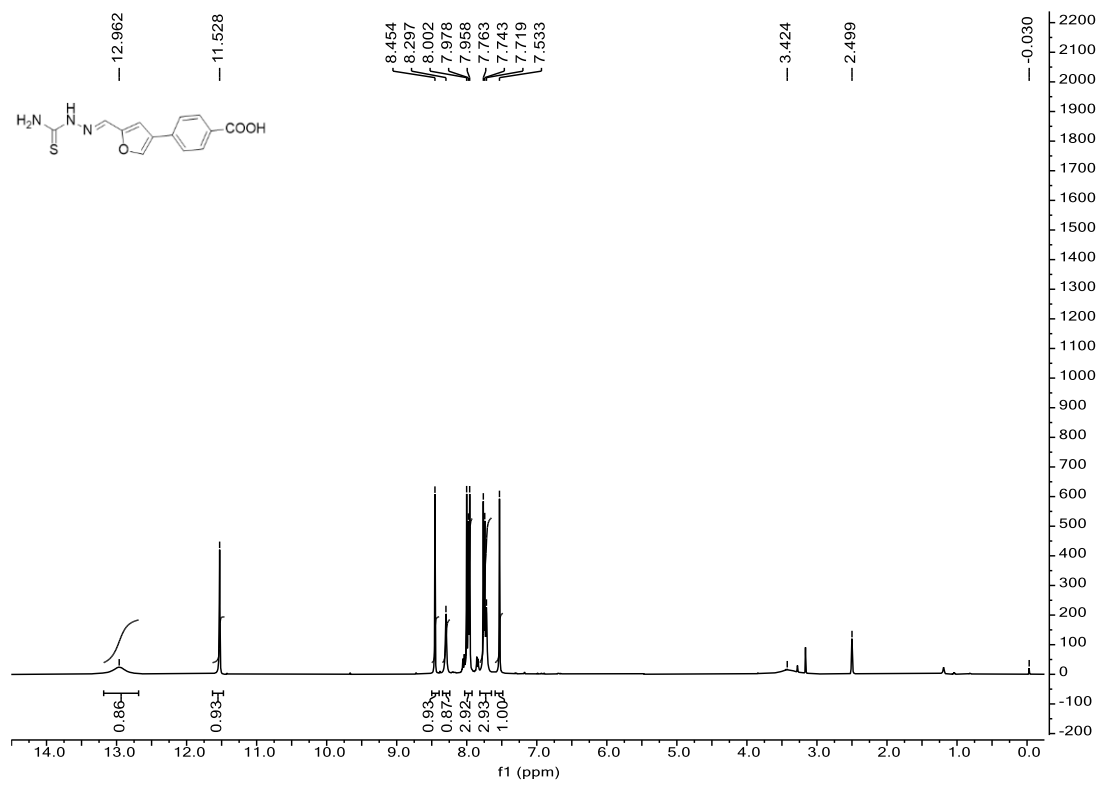

<sup>1</sup>H NMR of compound **F8-C1** (400 MHz, DMSO-*d*<sub>6</sub>)

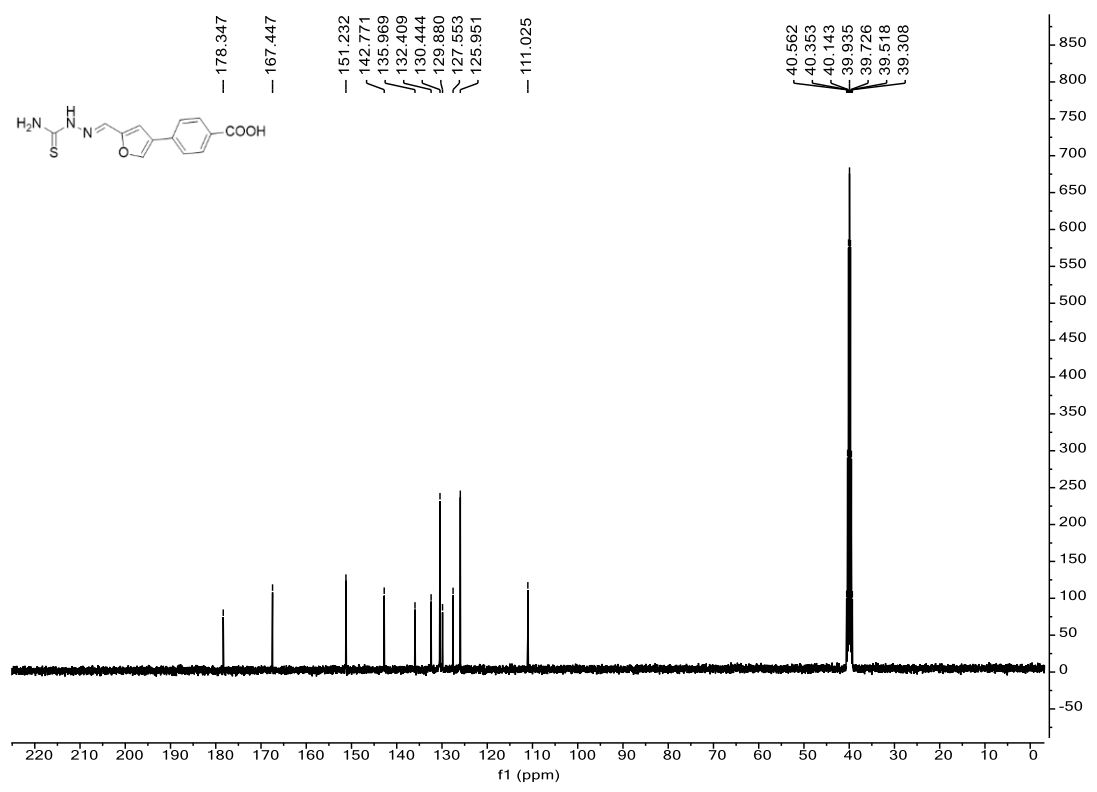

<sup>13</sup>C NMR of compound **F8-C1** (100 MHz, DMSO-*d*<sub>6</sub>)

NEGXEVO-G2QTOF#NotSet  
xgf-3-36 11 (0.203) Cm (11:13-(5:11+29:49))

23-Dec-2021

Waters  
TOF MS ES-  
1.93e5

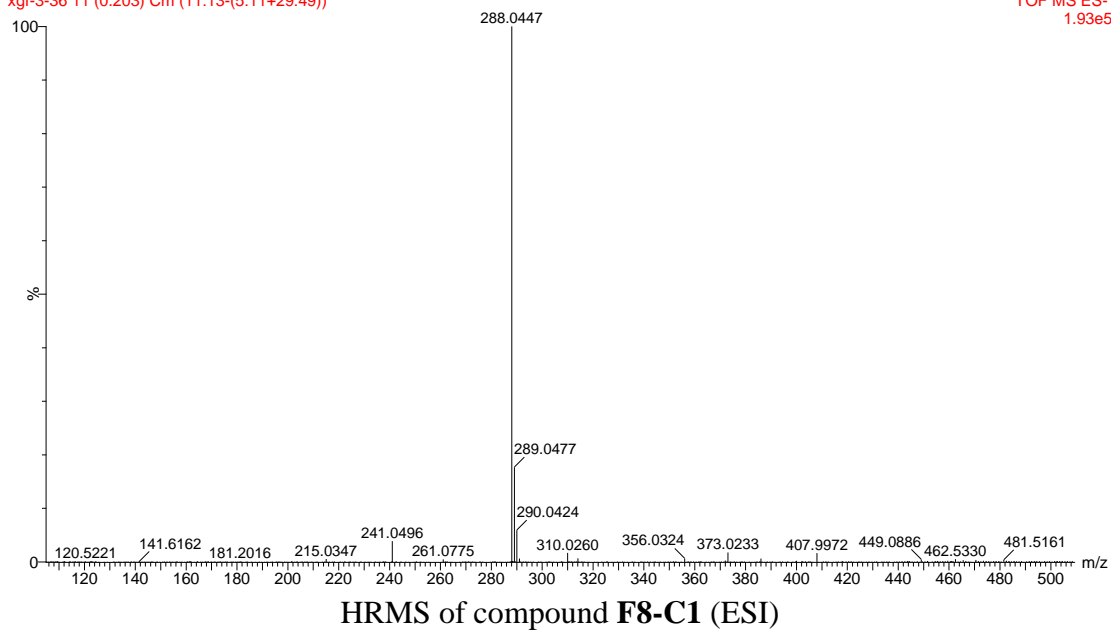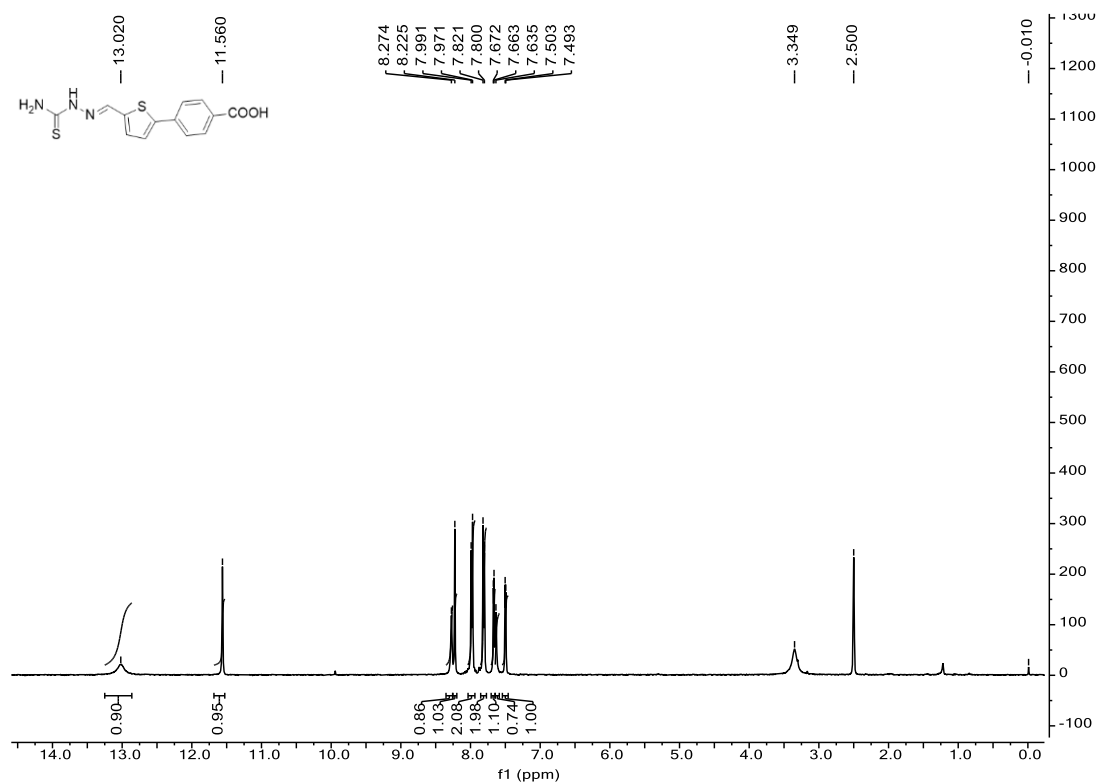

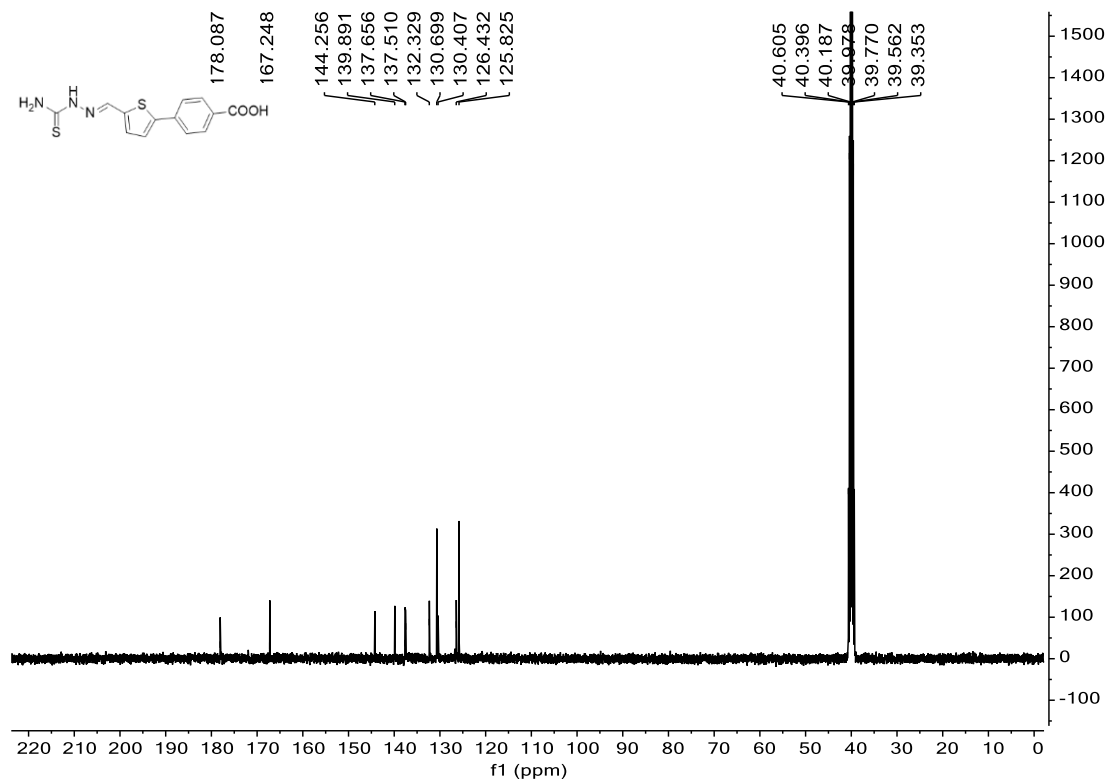

$^{13}\text{C}$  NMR of compound **F8-C2** (100 MHz, DMSO- $d_6$ )

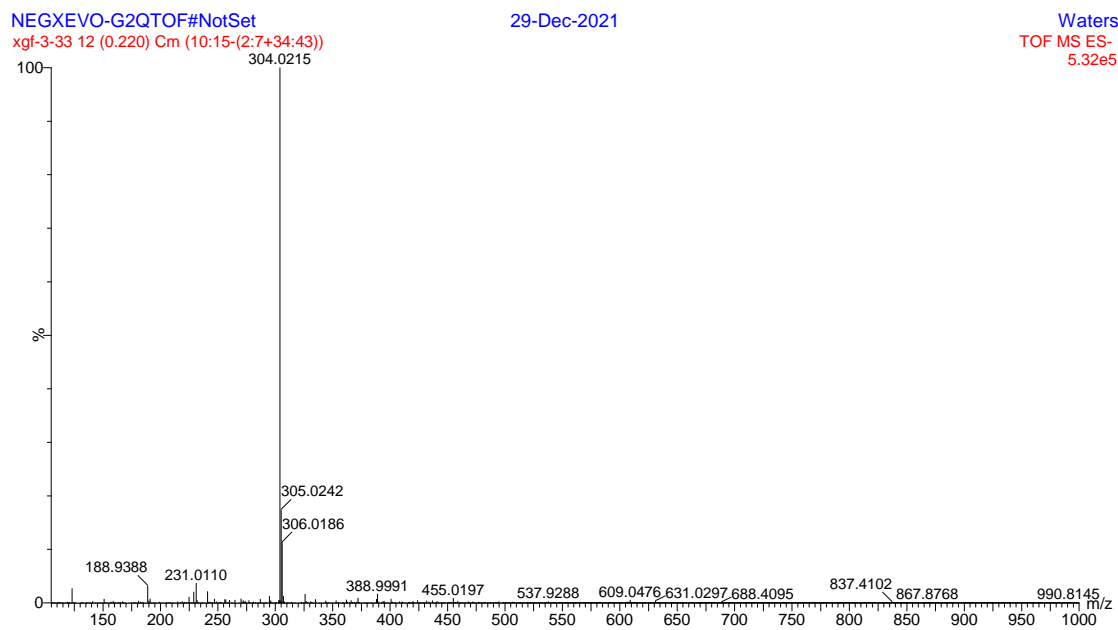

HRMS of compound **F8-C2** (ESI)

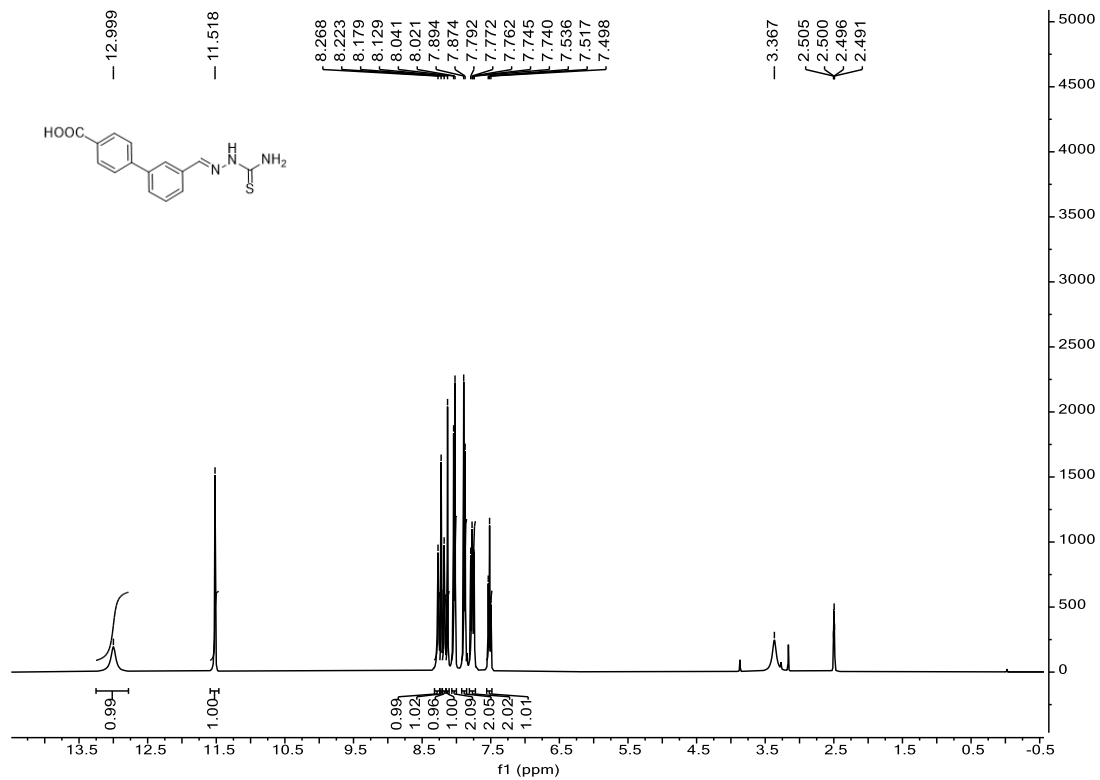

<sup>1</sup>H NMR of compound **F8-C3** (400 MHz, DMSO-*d*<sub>6</sub>)

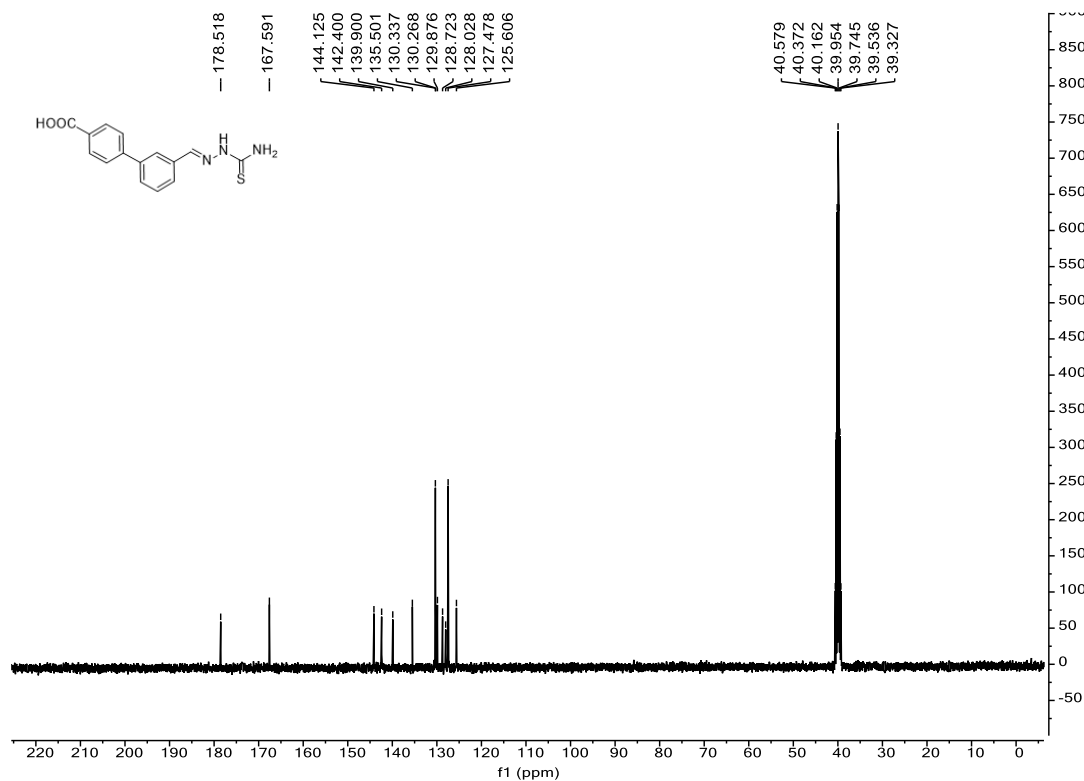

<sup>13</sup>C NMR of compound **F8-C3** (100 MHz, DMSO-*d*<sub>6</sub>)

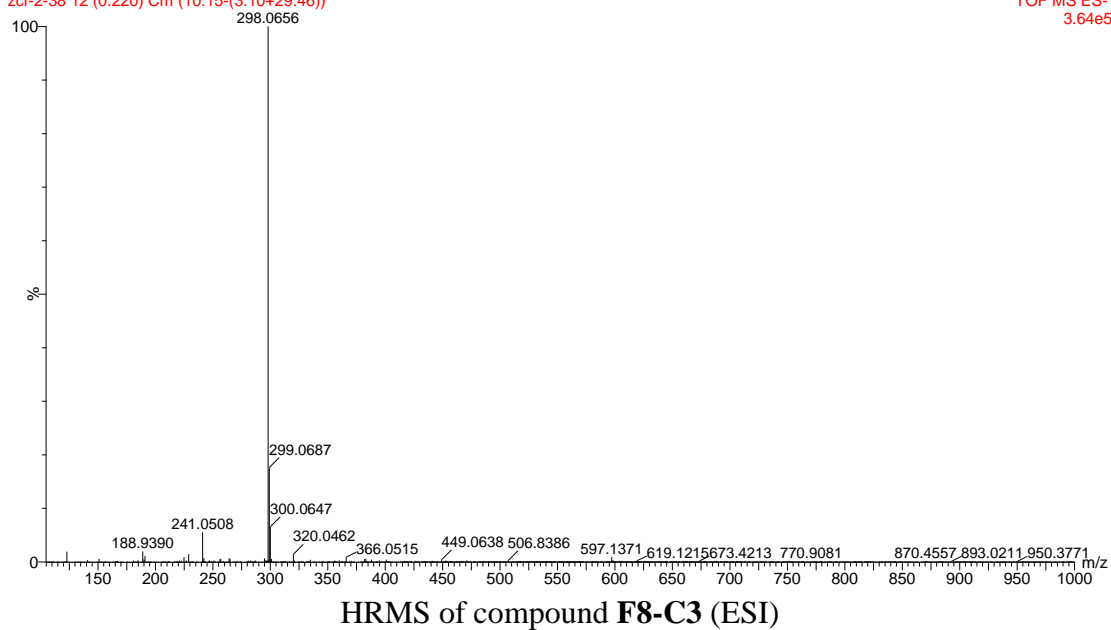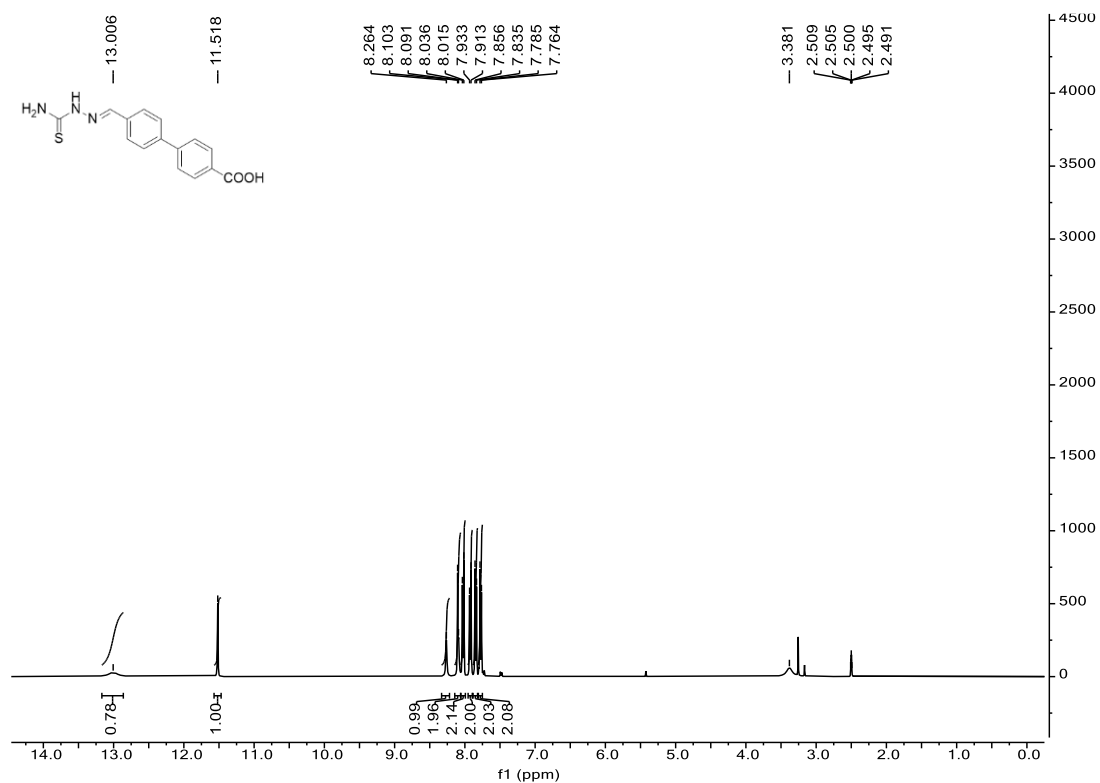



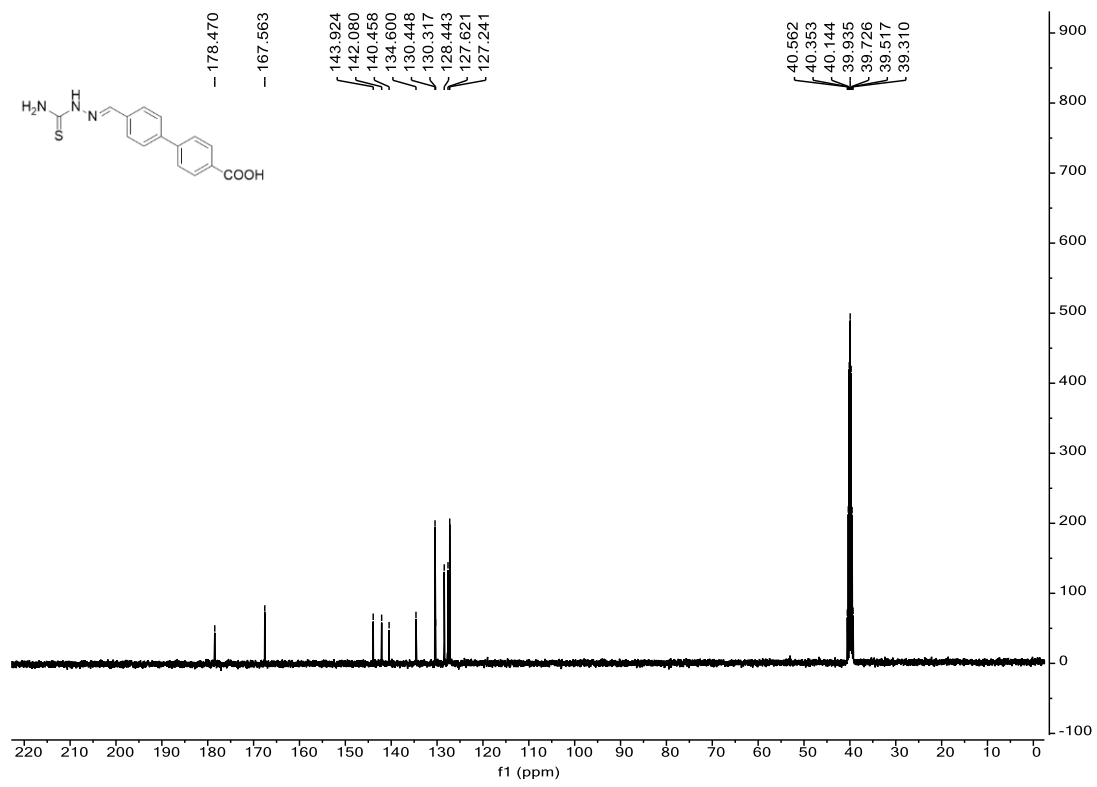

<sup>13</sup>C NMR of compound **F8-C4** (100 MHz, DMSO-*d*<sub>6</sub>)

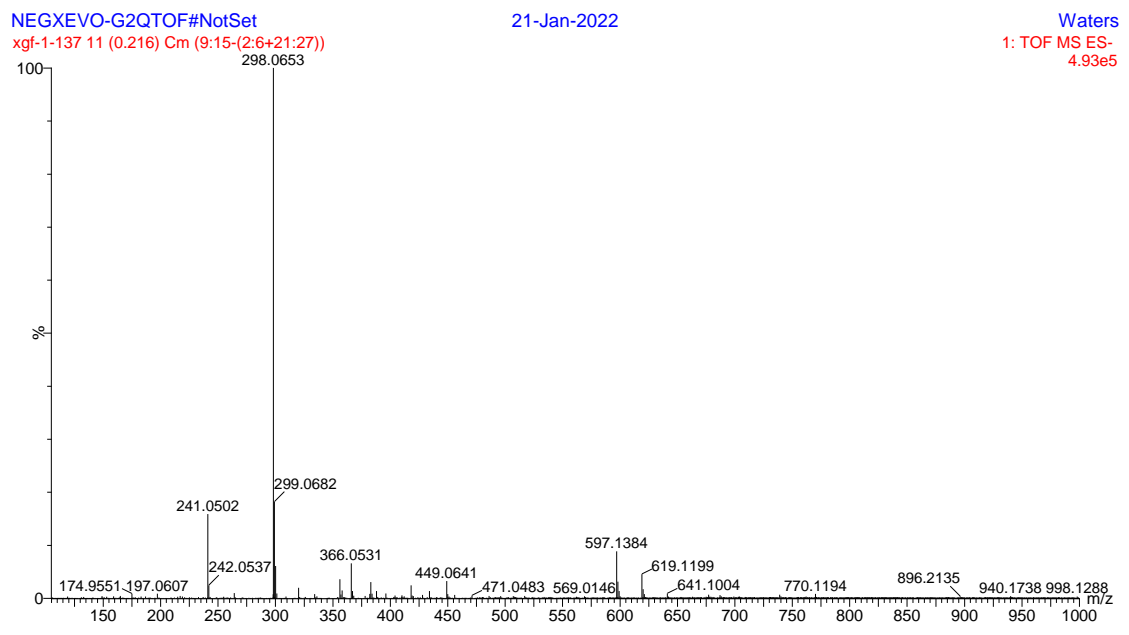

HRMS of compound **F8-C4** (ESI)
